# Supplementary material for: VIGET: A web portal for study of vaccine-induced host responses based on Reactome pathways and ImmPort data
Source: Front Immunol. 2023 Mar 21;14:1141030. doi: 10.3389/fimmu.2023.1141030 (PMC10172660; doi:10.3389/fimmu.2023.1141030)
Supplement: Supplementary Table 6 — Reactome pathway enrichment analysis results for genes having Log2FC > 0.2 reported in Table S3 . [file Table_6.xlsx]

## Sheet: OneWeek_PosGenes_Pathways
Stable Identifier	Pathway Name	Entities Found	Entities Total	Entities Ratio	Entitis pValue	Entities FDR
R-HSA-909733	Interferon alpha/beta signaling	44	190	0.012514	1.11022e-16	3.23075e-14
R-HSA-913531	Interferon Signaling	74	397	0.0261477	1.11022e-16	3.23075e-14
R-HSA-168256	Immune System	176	2698	0.177699	1.11022e-16	3.23075e-14
R-HSA-1280215	Cytokine Signaling in Immune system	112	1107	0.0729105	1.11022e-16	3.23075e-14
R-HSA-877300	Interferon gamma signaling	37	252	0.0165975	1.43219e-14	3.32268e-12
R-HSA-6783783	Interleukin-10 signaling	14	86	0.00566423	7.47596e-07	0.000145034
R-HSA-6798695	Neutrophil degranulation	36	480	0.0316143	1.42051e-06	0.000235805
R-HSA-1169410	Antiviral mechanism by IFN-stimulated genes	14	94	0.00619113	2.07989e-06	0.000301584
R-HSA-168249	Innate Immune System	72	1345	0.0885859	3.76982e-06	0.000486306
R-HSA-8936459	RUNX1 regulates genes involved in megakaryocyte differentiation and platelet function	12	78	0.00513732	8.02117e-06	0.000930456
R-HSA-936440	Negative regulators of DDX58/IFIH1 signaling	8	37	0.00243694	2.51914e-05	0.0026451
R-HSA-1169408	ISG15 antiviral mechanism	11	83	0.00546664	7.1623e-05	0.00694744
R-HSA-449147	Signaling by Interleukins	38	658	0.0433379	0.000207102	0.018432
R-HSA-380108	Chemokine receptors bind chemokines	8	57	0.0037542	0.00046959	0.0389759
R-HSA-69895	Transcriptional activation of cell cycle inhibitor p21	3	6	0.000395179	0.000918866	0.0661584
R-HSA-69560	Transcriptional activation of p53 responsive genes	3	6	0.000395179	0.000918866	0.0661584
R-HSA-6785807	Interleukin-4 and Interleukin-13 signaling	16	211	0.0138971	0.00108655	0.0738855
R-HSA-8983711	OAS antiviral response	4	15	0.000987947	0.00131651	0.0842568
R-HSA-168928	DDX58/IFIH1-mediated induction of interferon-alpha/beta	10	104	0.00684977	0.00173278	0.0953027
R-HSA-2559586	DNA Damage/Telomere Stress Induced Senescence	8	71	0.00467628	0.00188015	0.097768
R-HSA-1500620	Meiosis	9	92	0.00605941	0.00258539	0.0982447
R-HSA-5218859	Regulated Necrosis	8	73	0.00480801	0.00222763	0.0982447
R-HSA-912446	Meiotic recombination	7	58	0.00382006	0.00244335	0.0982447
R-HSA-69205	G1/S-Specific Transcription	6	43	0.00283211	0.0024314	0.0982447
R-HSA-453279	Mitotic G1 phase and G1/S transition	13	174	0.0114602	0.00348043	0.125295
R-HSA-918233	TRAF3-dependent IRF activation pathway	4	20	0.00131726	0.00368912	0.12543
R-HSA-6804116	TP53 Regulates Transcription of Genes Involved in G1 Cell Cycle Arrest	4	20	0.00131726	0.00368912	0.12543
R-HSA-2562578	TRIF-mediated programmed cell death	3	10	0.000658631	0.00388414	0.128177
R-HSA-171306	Packaging Of Telomere Ends	5	34	0.00223935	0.00443137	0.132941
R-HSA-5620971	Pyroptosis	5	34	0.00223935	0.00443137	0.132941
R-HSA-73728	RNA Polymerase I Promoter Opening	5	34	0.00223935	0.00443137	0.132941
R-HSA-168898	Toll-like Receptor Cascades	14	202	0.0133044	0.00475919	0.138017
R-HSA-201722	Formation of the beta-catenin:TCF transactivating complex	7	67	0.00441283	0.00531225	0.143431
R-HSA-76002	Platelet activation, signaling and aggregation	18	293	0.0192979	0.00516357	0.143431
R-HSA-114608	Platelet degranulation	11	141	0.0092867	0.00506406	0.143431
R-HSA-5334118	DNA methylation	5	36	0.00237107	0.00561191	0.151522
R-HSA-166016	Toll Like Receptor 4 (TLR4) Cascade	12	165	0.0108674	0.00600497	0.156129
R-HSA-448706	Interleukin-1 processing	3	12	0.000790358	0.00641476	0.16033
R-HSA-75072	mRNA Editing	3	12	0.000790358	0.00641476	0.16033
R-HSA-9707616	Heme signaling	7	70	0.00461042	0.00668043	0.16033
R-HSA-76005	Response to elevated platelet cytosolic Ca2+	11	148	0.00974774	0.00715077	0.171619
R-HSA-110330	Recognition and association of DNA glycosylase with site containing an affected purine	5	39	0.00256866	0.0077745	0.178814
R-HSA-1236973	Cross-presentation of particulate exogenous antigens (phagosomes)	3	13	0.000856221	0.00797373	0.183396
R-HSA-68616	Assembly of the ORC complex at the origin of replication	5	40	0.00263453	0.00860832	0.189383
R-HSA-933543	NF-kB activation through FADD/RIP-1 pathway mediated by caspase-8 and -10	3	14	0.000922084	0.00973702	0.19474
R-HSA-168188	Toll Like Receptor TLR6:TLR2 Cascade	10	133	0.0087598	0.00934365	0.19474
R-HSA-166058	MyD88:MAL(TIRAP) cascade initiated on plasma membrane	10	133	0.0087598	0.00934365	0.19474
R-HSA-181438	Toll Like Receptor 2 (TLR2) Cascade	10	136	0.00895739	0.0107839	0.204894
R-HSA-168179	Toll Like Receptor TLR1:TLR2 Cascade	10	136	0.00895739	0.0107839	0.204894
R-HSA-110328	Recognition and association of DNA glycosylase with site containing an affected pyrimidine	5	42	0.00276625	0.0104576	0.204894
R-HSA-140877	Formation of Fibrin Clot (Clotting Cascade)	5	43	0.00283211	0.0114769	0.21806
R-HSA-212300	PRC2 methylates histones and DNA	5	44	0.00289798	0.0125618	0.219425
R-HSA-73772	RNA Polymerase I Promoter Escape	6	61	0.00401765	0.0125521	0.219425
R-HSA-1221632	Meiotic synapsis	6	62	0.00408351	0.0134941	0.219425
R-HSA-5250924	B-WICH complex positively regulates rRNA expression	6	62	0.00408351	0.0134941	0.219425
R-HSA-427359	SIRT1 negatively regulates rRNA expression	5	45	0.00296384	0.013714	0.219425
R-HSA-1640170	Cell Cycle	34	734	0.0483435	0.0134447	0.219425
R-HSA-1834949	Cytosolic sensors of pathogen-associated DNA	7	78	0.00513732	0.0115973	0.219425
R-HSA-110331	Cleavage of the damaged purine	5	45	0.00296384	0.013714	0.219425
R-HSA-9707587	Regulation of HMOX1 expression and activity	2	6	0.000395179	0.0151688	0.227531
R-HSA-3214815	HDACs deacetylate histones	6	63	0.00414938	0.0144843	0.227531
R-HSA-8866911	TFAP2 (AP-2) family regulates transcription of cell cycle factors	2	6	0.000395179	0.0151688	0.227531
R-HSA-73927	Depurination	5	46	0.0030297	0.0149354	0.227531
R-HSA-1474165	Reproduction	9	123	0.00810117	0.0155618	0.233426
R-HSA-157118	Signaling by NOTCH	15	259	0.0170586	0.0164025	0.246038
R-HSA-9670095	Inhibition of DNA recombination at telomere	5	48	0.00316143	0.017592	0.246288
R-HSA-427389	ERCC6 (CSB) and EHMT2 (G9a) positively regulate rRNA expression	5	48	0.00316143	0.017592	0.246288
R-HSA-8939236	RUNX1 regulates transcription of genes involved in differentiation of HSCs	8	106	0.00698149	0.018594	0.260315
R-HSA-5625886	Activated PKN1 stimulates transcription of AR (androgen receptor) regulated genes KLK2 and KLK3	5	49	0.00322729	0.0190302	0.260668
R-HSA-69278	Cell Cycle, Mitotic	28	596	0.0392544	0.0200514	0.260668
R-HSA-69206	G1/S Transition	10	150	0.00987947	0.0198279	0.260668
R-HSA-381426	Regulation of Insulin-like Growth Factor (IGF) transport and uptake by Insulin-like Growth Factor Binding Proteins (IGFBPs)	9	127	0.00836462	0.0186897	0.260668
R-HSA-3134963	DEx/H-box helicases activate type I IFN and inflammatory cytokines production	2	7	0.000461042	0.0202342	0.263045
R-HSA-1810476	RIP-mediated NFkB activation via ZBP1	3	19	0.0012514	0.0217569	0.274336
R-HSA-69580	p53-Dependent G1/S DNA damage checkpoint	6	70	0.00461042	0.0228614	0.274336
R-HSA-69563	p53-Dependent G1 DNA Damage Response	6	70	0.00461042	0.0228614	0.274336
R-HSA-977225	Amyloid fiber formation	7	89	0.00586182	0.0220368	0.274336
R-HSA-110329	Cleavage of the damaged pyrimidine	5	51	0.00335902	0.0221336	0.274336
R-HSA-73928	Depyrimidination	5	51	0.00335902	0.0221336	0.274336
R-HSA-936964	Activation of IRF3/IRF7 mediated by TBK1/IKK epsilon	3	20	0.00131726	0.0248161	0.283245
R-HSA-5656169	Termination of translesion DNA synthesis	4	35	0.00230521	0.0242139	0.283245
R-HSA-140534	Caspase activation via Death Receptors in the presence of ligand	3	20	0.00131726	0.0248161	0.283245
R-HSA-69615	G1/S DNA Damage Checkpoints	6	72	0.00474215	0.0257495	0.283245
R-HSA-2559582	Senescence-Associated Secretory Phenotype (SASP)	7	91	0.00599355	0.0244661	0.283245
R-HSA-9616222	Transcriptional regulation of granulopoiesis	6	71	0.00467628	0.0242767	0.283245
R-HSA-8941855	RUNX3 regulates CDKN1A transcription	2	8	0.000526905	0.0259021	0.284923
R-HSA-75094	Formation of the Editosome	2	8	0.000526905	0.0259021	0.284923
R-HSA-375276	Peptide ligand-binding receptors	12	203	0.0133702	0.0260224	0.286247
R-HSA-5686938	Regulation of TLR by endogenous ligand	4	36	0.00237107	0.0264708	0.291178
R-HSA-2299718	Condensation of Prophase Chromosomes	5	55	0.00362247	0.0292826	0.292826
R-HSA-3214858	RMTs methylate histone arginines	5	55	0.00362247	0.0292826	0.292826
R-HSA-5689880	Ub-specific processing proteases	12	206	0.0135678	0.028643	0.292826
R-HSA-975155	MyD88 dependent cascade initiated on endosome	8	117	0.00770599	0.0308304	0.308304
R-HSA-168181	Toll Like Receptor 7/8 (TLR7/8) Cascade	8	118	0.00777185	0.0321635	0.321635
R-HSA-8878171	Transcriptional regulation by RUNX1	14	261	0.0171903	0.0347517	0.347517
R-HSA-1606322	ZBP1(DAI) mediated induction of type I IFNs	3	23	0.00151485	0.035306	0.349943
R-HSA-72200	mRNA Editing: C to U Conversion	2	10	0.000658631	0.0388826	0.349943
R-HSA-166166	MyD88-independent TLR4 cascade	8	121	0.00796944	0.0363976	0.349943
R-HSA-937061	TRIF(TICAM1)-mediated TLR4 signaling	8	121	0.00796944	0.0363976	0.349943
R-HSA-168138	Toll Like Receptor 9 (TLR9) Cascade	8	121	0.00796944	0.0363976	0.349943
R-HSA-5688426	Deubiquitination	15	289	0.0190344	0.0376504	0.349943
R-HSA-937041	IKK complex recruitment mediated by RIP1	3	24	0.00158072	0.0392349	0.353114
R-HSA-69306	DNA Replication	10	169	0.0111309	0.0396378	0.35674
R-HSA-5250913	Positive epigenetic regulation of rRNA expression	6	80	0.00526905	0.0396909	0.357218
R-HSA-427413	NoRC negatively regulates rRNA expression	6	80	0.00526905	0.0396909	0.357218
R-HSA-187577	SCF(Skp2)-mediated degradation of p27/p21	5	62	0.00408351	0.0449715	0.359772
R-HSA-445355	Smooth Muscle Contraction	5	61	0.00401765	0.0424759	0.359772
R-HSA-5578749	Transcriptional regulation by small RNAs	6	81	0.00533491	0.0417129	0.359772
R-HSA-5668541	TNFR2 non-canonical NF-kB pathway	7	104	0.00684977	0.0447976	0.359772
R-HSA-109582	Hemostasis	34	803	0.0528881	0.0412392	0.359772
R-HSA-140875	Common Pathway of Fibrin Clot Formation	3	25	0.00164658	0.043376	0.359772
R-HSA-73929	Base-Excision Repair, AP Site Formation	5	63	0.00414938	0.047553	0.380424
R-HSA-140837	Intrinsic Pathway of Fibrin Clot Formation	3	26	0.00171244	0.0477262	0.38181
R-HSA-933541	TRAF6 mediated IRF7 activation	4	44	0.00289798	0.0489703	0.391762
R-HSA-5689896	Ovarian tumor domain proteases	4	44	0.00289798	0.0489703	0.391762
R-HSA-73854	RNA Polymerase I Promoter Clearance	6	85	0.00559837	0.0504431	0.403544
R-HSA-9617828	FOXO-mediated transcription of cell cycle genes	3	27	0.0017783	0.0522821	0.418256
R-HSA-8877627	Vitamin E	1	2	0.000131726	0.0599138	0.419397
R-HSA-8957275	Post-translational protein phosphorylation	7	109	0.00717908	0.0548577	0.419397
R-HSA-3214847	HATs acetylate histones	7	110	0.00724495	0.0570255	0.419397
R-HSA-73864	RNA Polymerase I Transcription	6	87	0.00573009	0.0551975	0.419397
R-HSA-77042	Formation of editosomes by ADAR proteins	1	2	0.000131726	0.0599138	0.419397
R-HSA-112409	RAF-independent MAPK1/3 activation	3	28	0.00184417	0.0570397	0.419397
R-HSA-8953750	Transcriptional Regulation by E2F6	4	46	0.0030297	0.0558373	0.419397
R-HSA-5250941	Negative epigenetic regulation of rRNA expression	6	89	0.00586182	0.0602138	0.421496
R-HSA-1912408	Pre-NOTCH Transcription and Translation	6	89	0.00586182	0.0602138	0.421496
R-HSA-446652	Interleukin-1 family signaling	10	183	0.012053	0.0609385	0.42657
R-HSA-9648895	Response of EIF2AK1 (HRI) to heme deficiency	3	29	0.00191003	0.0619948	0.433964
R-HSA-5357801	Programmed Cell Death	12	234	0.015412	0.0628433	0.439903
R-HSA-110313	Translesion synthesis by Y family DNA polymerases bypasses lesions on DNA template	4	48	0.00316143	0.0631949	0.442364
R-HSA-68867	Assembly of the pre-replicative complex	7	114	0.0075084	0.0662226	0.463558
R-HSA-5357956	TNFR1-induced NFkappaB signaling pathway	3	30	0.00197589	0.0671431	0.470002
R-HSA-933542	TRAF6 mediated NF-kB activation	3	30	0.00197589	0.0671431	0.470002
R-HSA-5669034	TNFs bind their physiological receptors	3	30	0.00197589	0.0671431	0.470002
R-HSA-1280218	Adaptive Immune System	40	1012	0.0666535	0.067475	0.472325
R-HSA-2514853	Condensation of Prometaphase Chromosomes	2	15	0.000987947	0.0792224	0.475334
R-HSA-9758890	Transport of RCbl within the body	2	14	0.000922084	0.070387	0.475334
R-HSA-983169	Class I MHC mediated antigen processing & presentation	21	479	0.0315484	0.0715011	0.475334
R-HSA-5689901	Metalloprotease DUBs	3	32	0.00210762	0.0779994	0.475334
R-HSA-5357769	Caspase activation via extrinsic apoptotic signalling pathway	3	32	0.00210762	0.0779994	0.475334
R-HSA-381183	ATF6 (ATF6-alpha) activates chaperone genes	2	15	0.000987947	0.0792224	0.475334
R-HSA-975138	TRAF6 mediated induction of NFkB and MAP kinases upon TLR7/8 or 9 activation	7	116	0.00764012	0.0711378	0.475334
R-HSA-1266695	Interleukin-7 signaling	3	31	0.00204176	0.0724796	0.475334
R-HSA-166020	Transfer of LPS from LBP carrier to CD14	1	3	0.000197589	0.0885136	0.497141
R-HSA-5626978	TNFR1-mediated ceramide production	1	6	0.000395179	0.169208	0.497141
R-HSA-1251932	PLCG1 events in ERBB2 signaling	1	6	0.000395179	0.169208	0.497141
R-HSA-68911	G2 Phase	1	7	0.000461042	0.194489	0.497141
R-HSA-176417	Phosphorylation of Emi1	1	8	0.000526905	0.219003	0.497141
R-HSA-975110	TRAF6 mediated IRF7 activation in TLR7/8 or 9 signaling	2	17	0.00111967	0.0978347	0.497141
R-HSA-8964026	Chylomicron clearance	1	9	0.000592768	0.242772	0.497141
R-HSA-937072	TRAF6-mediated induction of TAK1 complex within TLR4 complex	2	19	0.0012514	0.117524	0.497141
R-HSA-8964315	G beta:gamma signalling through BTK	2	19	0.0012514	0.117524	0.497141
R-HSA-8951430	RUNX3 regulates WNT signaling	1	10	0.000658631	0.265819	0.497141
R-HSA-4411364	Binding of TCF/LEF:CTNNB1 to target gene promoters	1	10	0.000658631	0.265819	0.497141
R-HSA-9632974	NR1H2 & NR1H3 regulate gene expression linked to gluconeogenesis	1	10	0.000658631	0.265819	0.497141
R-HSA-212718	EGFR interacts with phospholipase C-gamma	1	11	0.000724495	0.288166	0.497141
R-HSA-9768778	Regulation of NPAS4 mRNA translation	1	11	0.000724495	0.288166	0.497141
R-HSA-164378	PKA activation in glucagon signalling	2	23	0.00151485	0.159374	0.497141
R-HSA-5218900	CASP8 activity is inhibited	1	12	0.000790358	0.309835	0.497141
R-HSA-174113	SCF-beta-TrCP mediated degradation of Emi1	4	55	0.00362247	0.0926776	0.497141
R-HSA-3214842	HDMs demethylate histones	2	31	0.00204176	0.248626	0.497141
R-HSA-3000484	Scavenging by Class F Receptors	1	16	0.00105381	0.390123	0.497141
R-HSA-5685939	HDR through MMEJ (alt-NHEJ)	1	17	0.00111967	0.408694	0.497141
R-HSA-170660	Adenylate cyclase activating pathway	1	17	0.00111967	0.408694	0.497141
R-HSA-8847993	ERBB2 Activates PTK6 Signaling	1	18	0.00118554	0.4267	0.497141
R-HSA-174184	Cdc20:Phospho-APC/C mediated degradation of Cyclin A	4	73	0.00480801	0.191199	0.497141
R-HSA-8854050	FBXL7 down-regulates AURKA during mitotic entry and in early mitosis	3	55	0.00362247	0.242352	0.497141
R-HSA-179419	APC:Cdc20 mediated degradation of cell cycle proteins prior to satisfation of the cell cycle checkpoint	4	74	0.00487387	0.197428	0.497141
R-HSA-176409	APC/C:Cdc20 mediated degradation of mitotic proteins	4	76	0.0050056	0.210066	0.497141
R-HSA-8948700	Competing endogenous RNAs (ceRNAs) regulate PTEN translation	1	19	0.0012514	0.44416	0.497141
R-HSA-170670	Adenylate cyclase inhibitory pathway	1	19	0.0012514	0.44416	0.497141
R-HSA-180336	SHC1 events in EGFR signaling	1	19	0.0012514	0.44416	0.497141
R-HSA-73780	RNA Polymerase III Chain Elongation	1	19	0.0012514	0.44416	0.497141
R-HSA-6785631	ERBB2 Regulates Cell Motility	1	19	0.0012514	0.44416	0.497141
R-HSA-3301854	Nuclear Pore Complex (NPC) Disassembly	2	42	0.00276625	0.372391	0.497141
R-HSA-430039	mRNA decay by 5' to 3' exoribonuclease	1	21	0.00138313	0.477502	0.497141
R-HSA-141405	Inhibition of the proteolytic activity of APC/C required for the onset of anaphase by mitotic spindle checkpoint components	1	21	0.00138313	0.477502	0.497141
R-HSA-141430	Inactivation of APC/C via direct inhibition of the APC/C complex	1	21	0.00138313	0.477502	0.497141
R-HSA-174437	Removal of the Flap Intermediate from the C-strand	1	22	0.00144899	0.493418	0.497141
R-HSA-174154	APC/C:Cdc20 mediated degradation of Securin	3	68	0.00447869	0.350566	0.497141
R-HSA-1989781	PPARA activates gene expression	7	175	0.011526	0.298679	0.497141
R-HSA-991365	Activation of GABAB receptors	2	50	0.00329316	0.457249	0.497141
R-HSA-5693607	Processing of DNA double-strand break ends	4	89	0.00586182	0.296617	0.497141
R-HSA-400206	Regulation of lipid metabolism by PPARalpha	7	177	0.0116578	0.308372	0.497141
R-HSA-5213460	RIPK1-mediated regulated necrosis	3	42	0.00276625	0.142059	0.497141
R-HSA-3214841	PKMTs methylate histone lysines	3	51	0.00335902	0.210115	0.497141
R-HSA-977444	GABA B receptor activation	2	50	0.00329316	0.457249	0.497141
R-HSA-5675482	Regulation of necroptotic cell death	3	36	0.00237107	0.101804	0.497141
R-HSA-2424491	DAP12 signaling	3	36	0.00237107	0.101804	0.497141
R-HSA-176814	Activation of APC/C and APC/C:Cdc20 mediated degradation of mitotic proteins	4	77	0.00507146	0.216469	0.497141
R-HSA-75158	TRAIL signaling	1	8	0.000526905	0.219003	0.497141
R-HSA-389359	CD28 dependent Vav1 pathway	1	17	0.00111967	0.408694	0.497141
R-HSA-8964616	G beta:gamma signalling through CDC42	1	21	0.00138313	0.477502	0.497141
R-HSA-157579	Telomere Maintenance	6	109	0.00717908	0.124586	0.497141
R-HSA-73886	Chromosome Maintenance	6	136	0.00895739	0.246433	0.497141
R-HSA-912694	Regulation of IFNA/IFNB signaling	2	28	0.00184417	0.214662	0.497141
R-HSA-5682910	LGI-ADAM interactions	1	14	0.000922084	0.351217	0.497141
R-HSA-171319	Telomere Extension By Telomerase	2	34	0.00223935	0.282741	0.497141
R-HSA-9634597	GPER1 signaling	3	56	0.00368834	0.250538	0.497141
R-HSA-397795	G-protein beta:gamma signalling	2	39	0.00256866	0.339167	0.497141
R-HSA-69656	Cyclin A:Cdk2-associated events at S phase entry	5	90	0.00592768	0.148674	0.497141
R-HSA-176408	Regulation of APC/C activators between G1/S and early anaphase	5	83	0.00546664	0.116968	0.497141
R-HSA-168638	NOD1/2 Signaling Pathway	2	41	0.00270039	0.361386	0.497141
R-HSA-983168	Antigen processing: Ubiquitination & Proteasome degradation	13	315	0.0207469	0.181456	0.497141
R-HSA-174577	Activation of C3 and C5	1	7	0.000461042	0.194489	0.497141
R-HSA-163680	AMPK inhibits chREBP transcriptional activation activity	1	11	0.000724495	0.288166	0.497141
R-HSA-163615	PKA activation	2	23	0.00151485	0.159374	0.497141
R-HSA-774815	Nucleosome assembly	4	54	0.00355661	0.0881223	0.497141
R-HSA-606279	Deposition of new CENPA-containing nucleosomes at the centromere	4	54	0.00355661	0.0881223	0.497141
R-HSA-9029558	NR1H2 & NR1H3 regulate gene expression linked to lipogenesis	1	17	0.00111967	0.408694	0.497141
R-HSA-9762114	GSK3B and BTRC:CUL1-mediated-degradation of NFE2L2	3	54	0.00355661	0.234212	0.497141
R-HSA-68949	Orc1 removal from chromatin	4	73	0.00480801	0.191199	0.497141
R-HSA-453276	Regulation of mitotic cell cycle	5	92	0.00605941	0.158342	0.497141
R-HSA-174143	APC/C-mediated degradation of cell cycle proteins	5	92	0.00605941	0.158342	0.497141
R-HSA-174430	Telomere C-strand synthesis initiation	1	19	0.0012514	0.44416	0.497141
R-HSA-5619507	Activation of HOX genes during differentiation	6	116	0.00764012	0.152834	0.497141
R-HSA-5617472	Activation of anterior HOX genes in hindbrain development during early embryogenesis	6	116	0.00764012	0.152834	0.497141
R-HSA-430116	GP1b-IX-V activation signalling	1	12	0.000790358	0.309835	0.497141
R-HSA-9609523	Insertion of tail-anchored proteins into the endoplasmic reticulum membrane	2	25	0.00164658	0.181201	0.497141
R-HSA-4641265	Repression of WNT target genes	1	16	0.00105381	0.390123	0.497141
R-HSA-75893	TNF signaling	3	56	0.00368834	0.250538	0.497141
R-HSA-212165	Epigenetic regulation of gene expression	6	139	0.00915498	0.261746	0.497141
R-HSA-1606341	IRF3 mediated activation of type 1 IFN	1	7	0.000461042	0.194489	0.497141
R-HSA-75892	Platelet Adhesion to exposed collagen	2	16	0.00105381	0.0883809	0.497141
R-HSA-9705462	Inactivation of CSF3 (G-CSF) signaling	2	27	0.0017783	0.203433	0.497141
R-HSA-179812	GRB2 events in EGFR signaling	1	16	0.00105381	0.390123	0.497141
R-HSA-2565942	Regulation of PLK1 Activity at G2/M Transition	4	92	0.00605941	0.317281	0.497141
R-HSA-174178	APC/C:Cdh1 mediated degradation of Cdc20 and other APC/C:Cdh1 targeted proteins in late mitosis/early G1	3	74	0.00487387	0.40039	0.497141
R-HSA-456926	Thrombin signalling through proteinase activated receptors (PARs)	2	36	0.00237107	0.305423	0.497141
R-HSA-8949664	Processing of SMDT1	1	17	0.00111967	0.408694	0.497141
R-HSA-8856828	Clathrin-mediated endocytosis	7	161	0.010604	0.233118	0.497141
R-HSA-69236	G1 Phase	3	52	0.00342488	0.218088	0.497141
R-HSA-69231	Cyclin D associated events in G1	3	52	0.00342488	0.218088	0.497141
R-HSA-5357905	Regulation of TNFR1 signaling	3	46	0.0030297	0.171368	0.497141
R-HSA-9707564	Cytoprotection by HMOX1	5	91	0.00599355	0.153476	0.497141
R-HSA-5693571	Nonhomologous End-Joining (NHEJ)	3	56	0.00368834	0.250538	0.497141
R-HSA-416482	G alpha (12/13) signalling events	5	86	0.00566423	0.130134	0.497141
R-HSA-381340	Transcriptional regulation of white adipocyte differentiation	4	109	0.00717908	0.434702	0.497141
R-HSA-2173782	Binding and Uptake of Ligands by Scavenger Receptors	7	168	0.011065	0.26533	0.497141
R-HSA-75064	mRNA Editing: A to I Conversion	1	4	0.000263453	0.116245	0.497141
R-HSA-75102	C6 deamination of adenosine	1	4	0.000263453	0.116245	0.497141
R-HSA-8875513	MET interacts with TNS proteins	1	5	0.000329316	0.143135	0.497141
R-HSA-844623	The IPAF inflammasome	1	5	0.000329316	0.143135	0.497141
R-HSA-170145	Phosphorylation of proteins involved in the G2/M transition by Cyclin A:Cdc2 complexes	1	5	0.000329316	0.143135	0.497141
R-HSA-69478	G2/M DNA replication checkpoint	1	7	0.000461042	0.194489	0.497141
R-HSA-434313	Intracellular metabolism of fatty acids regulates insulin secretion	1	9	0.000592768	0.242772	0.497141
R-HSA-162791	Attachment of GPI anchor to uPAR	1	10	0.000658631	0.265819	0.497141
R-HSA-419771	Opsins	1	10	0.000658631	0.265819	0.497141
R-HSA-3371378	Regulation by c-FLIP	1	11	0.000724495	0.288166	0.497141
R-HSA-1237044	Erythrocytes take up carbon dioxide and release oxygen	2	24	0.00158072	0.170228	0.497141
R-HSA-9619229	Activation of RAC1 downstream of NMDARs	1	12	0.000790358	0.309835	0.497141
R-HSA-176974	Unwinding of DNA	1	12	0.000790358	0.309835	0.497141
R-HSA-428543	Inactivation of CDC42 and RAC1	1	12	0.000790358	0.309835	0.497141
R-HSA-6803544	Ion influx/efflux at host-pathogen interface	1	13	0.000856221	0.330845	0.497141
R-HSA-2151209	Activation of PPARGC1A (PGC-1alpha) by phosphorylation	1	13	0.000856221	0.330845	0.497141
R-HSA-3000497	Scavenging by Class H Receptors	1	15	0.000987947	0.37097	0.497141
R-HSA-202670	ERKs are inactivated	1	15	0.000987947	0.37097	0.497141
R-HSA-3000480	Scavenging by Class A Receptors	3	49	0.00322729	0.194376	0.497141
R-HSA-2559584	Formation of Senescence-Associated Heterochromatin Foci (SAHF)	1	17	0.00111967	0.408694	0.497141
R-HSA-804914	Transport of fatty acids	1	18	0.00118554	0.4267	0.497141
R-HSA-163359	Glucagon signaling in metabolic regulation	2	40	0.00263453	0.350309	0.497141
R-HSA-5610780	Degradation of GLI1 by the proteasome	3	62	0.00408351	0.300329	0.497141
R-HSA-1963640	GRB2 events in ERBB2 signaling	1	21	0.00138313	0.477502	0.497141
R-HSA-453274	Mitotic G2-G2/M phases	10	214	0.0140947	0.130771	0.497141
R-HSA-432720	Lysosome Vesicle Biogenesis	2	43	0.00283211	0.38332	0.497141
R-HSA-9696273	RND1 GTPase cycle	2	43	0.00283211	0.38332	0.497141
R-HSA-1236974	ER-Phagosome pathway	8	173	0.0113943	0.170548	0.497141
R-HSA-1614517	Sulfide oxidation to sulfate	1	22	0.00144899	0.493418	0.497141
R-HSA-69052	Switching of origins to a post-replicative state	4	94	0.00619113	0.331123	0.497141
R-HSA-69017	CDK-mediated phosphorylation and removal of Cdc6	3	75	0.00493974	0.408602	0.497141
R-HSA-4615885	SUMOylation of DNA replication proteins	2	50	0.00329316	0.457249	0.497141
R-HSA-211733	Regulation of activated PAK-2p34 by proteasome mediated degradation	2	50	0.00329316	0.457249	0.497141
R-HSA-69275	G2/M Transition	10	212	0.013963	0.125319	0.497141
R-HSA-2172127	DAP12 interactions	3	53	0.00349075	0.226122	0.497141
R-HSA-114604	GPVI-mediated activation cascade	3	43	0.00283211	0.149222	0.497141
R-HSA-432040	Vasopressin regulates renal water homeostasis via Aquaporins	3	53	0.00349075	0.226122	0.497141
R-HSA-5689603	UCH proteinases	6	98	0.00645459	0.086029	0.497141
R-HSA-9013973	TICAM1-dependent activation of IRF3/IRF7	1	14	0.000922084	0.351217	0.497141
R-HSA-209543	p75NTR recruits signalling complexes	1	16	0.00105381	0.390123	0.497141
R-HSA-69273	Cyclin A/B1/B2 associated events during G2/M transition	2	32	0.00210762	0.259996	0.497141
R-HSA-388396	GPCR downstream signalling	25	794	0.0522953	0.489782	0.497141
R-HSA-1480926	O2/CO2 exchange in erythrocytes	2	24	0.00158072	0.170228	0.497141
R-HSA-111931	PKA-mediated phosphorylation of CREB	2	26	0.00171244	0.192274	0.497141
R-HSA-3295583	TRP channels	2	32	0.00210762	0.259996	0.497141
R-HSA-1679131	Trafficking and processing of endosomal TLR	1	16	0.00105381	0.390123	0.497141
R-HSA-1963642	PI3K events in ERBB2 signaling	1	22	0.00144899	0.493418	0.497141
R-HSA-166663	Initial triggering of complement	5	120	0.00790358	0.313863	0.497141
R-HSA-1912422	Pre-NOTCH Expression and Processing	6	114	0.0075084	0.144488	0.497141
R-HSA-199992	trans-Golgi Network Vesicle Budding	3	80	0.00526905	0.449095	0.497141
R-HSA-69242	S Phase	6	179	0.0117895	0.476629	0.497141
R-HSA-381676	Glucagon-like Peptide-1 (GLP1) regulates insulin secretion	2	50	0.00329316	0.457249	0.497141
R-HSA-5625740	RHO GTPases activate PKNs	5	80	0.00526905	0.104475	0.497141
R-HSA-69202	Cyclin E associated events during G1/S transition	5	88	0.00579596	0.139268	0.497141
R-HSA-8856825	Cargo recognition for clathrin-mediated endocytosis	6	115	0.00757426	0.148634	0.497141
R-HSA-5610785	GLI3 is processed to GLI3R by the proteasome	3	62	0.00408351	0.300329	0.497141
R-HSA-5610783	Degradation of GLI2 by the proteasome	3	62	0.00408351	0.300329	0.497141
R-HSA-3000471	Scavenging by Class B Receptors	1	21	0.00138313	0.477502	0.497141
R-HSA-418594	G alpha (i) signalling events	15	426	0.0280577	0.339949	0.497141
R-HSA-1236975	Antigen processing-Cross presentation	10	195	0.0128433	0.0842122	0.497141
R-HSA-168643	Nucleotide-binding domain, leucine rich repeat containing receptor (NLR) signaling pathways	3	72	0.00474215	0.383874	0.497141
R-HSA-73887	Death Receptor Signalling	8	164	0.0108016	0.13922	0.497141
R-HSA-4086398	Ca2+ pathway	3	81	0.00533491	0.457063	0.497141
R-HSA-69620	Cell Cycle Checkpoints	12	279	0.0183758	0.159643	0.497141
R-HSA-68875	Mitotic Prophase	7	135	0.00889152	0.128219	0.497141
R-HSA-195253	Degradation of beta-catenin by the destruction complex	4	91	0.00599355	0.310377	0.497141
R-HSA-9020702	Interleukin-1 signaling	7	125	0.00823289	0.0958643	0.497141
R-HSA-9013957	TLR3-mediated TICAM1-dependent programmed cell death	1	6	0.000395179	0.169208	0.497141
R-HSA-1566977	Fibronectin matrix formation	1	7	0.000461042	0.194489	0.497141
R-HSA-1247673	Erythrocytes take up oxygen and release carbon dioxide	2	16	0.00105381	0.0883809	0.497141
R-HSA-3134975	Regulation of innate immune responses to cytosolic DNA	2	21	0.00138313	0.138096	0.497141
R-HSA-69416	Dimerization of procaspase-8	1	11	0.000724495	0.288166	0.497141
R-HSA-444473	Formyl peptide receptors bind formyl peptides and many other ligands	1	11	0.000724495	0.288166	0.497141
R-HSA-2855086	Ficolins bind to repetitive carbohydrate structures on the target cell surface	1	12	0.000790358	0.309835	0.497141
R-HSA-426048	Arachidonate production from DAG	1	13	0.000856221	0.330845	0.497141
R-HSA-428359	Insulin-like Growth Factor-2 mRNA Binding Proteins (IGF2BPs/IMPs/VICKZs) bind RNA	1	13	0.000856221	0.330845	0.497141
R-HSA-5357786	TNFR1-induced proapoptotic signaling	1	14	0.000922084	0.351217	0.497141
R-HSA-166662	Lectin pathway of complement activation	1	15	0.000987947	0.37097	0.497141
R-HSA-442720	CREB1 phosphorylation through the activation of Adenylate Cyclase	1	17	0.00111967	0.408694	0.497141
R-HSA-9674555	Signaling by CSF3 (G-CSF)	2	35	0.00230521	0.294095	0.497141
R-HSA-9604323	Negative regulation of NOTCH4 signaling	3	57	0.0037542	0.258764	0.497141
R-HSA-9013407	RHOH GTPase cycle	2	38	0.0025028	0.327967	0.497141
R-HSA-168927	TICAM1, RIP1-mediated IKK complex recruitment	1	19	0.0012514	0.44416	0.497141
R-HSA-5676590	NIK-->noncanonical NF-kB signaling	3	61	0.00401765	0.291974	0.497141
R-HSA-5607761	Dectin-1 mediated noncanonical NF-kB signaling	3	66	0.00434697	0.333827	0.497141
R-HSA-176407	Conversion from APC/C:Cdc20 to APC/C:Cdh1 in late anaphase	1	22	0.00144899	0.493418	0.497141
R-HSA-9013026	RHOB GTPase cycle	3	75	0.00493974	0.408602	0.497141
R-HSA-9013106	RHOC GTPase cycle	3	79	0.00520319	0.441081	0.497141
R-HSA-166658	Complement cascade	7	156	0.0102746	0.210971	0.497141
R-HSA-9018519	Estrogen-dependent gene expression	7	154	0.0101429	0.202342	0.497141
R-HSA-193639	p75NTR signals via NF-kB	1	19	0.0012514	0.44416	0.497141
R-HSA-8853884	Transcriptional Regulation by VENTX	2	48	0.00316143	0.436629	0.497141
R-HSA-8852276	The role of GTSE1 in G2/M progression after G2 checkpoint	4	83	0.00546664	0.255897	0.497141
R-HSA-1169091	Activation of NF-kappaB in B cells	3	72	0.00474215	0.383874	0.497141
R-HSA-422356	Regulation of insulin secretion	4	108	0.00711322	0.427887	0.497141
R-HSA-73894	DNA Repair	13	381	0.0250939	0.397294	0.497141
R-HSA-392154	Nitric oxide stimulates guanylate cyclase	2	35	0.00230521	0.294095	0.497141
R-HSA-975871	MyD88 cascade initiated on plasma membrane	5	109	0.00717908	0.24928	0.497141
R-HSA-9662360	Sensory processing of sound by inner hair cells of the cochlea	3	76	0.0050056	0.416779	0.497141
R-HSA-168142	Toll Like Receptor 10 (TLR10) Cascade	5	109	0.00717908	0.24928	0.497141
R-HSA-168176	Toll Like Receptor 5 (TLR5) Cascade	5	109	0.00717908	0.24928	0.497141
R-HSA-201681	TCF dependent signaling in response to WNT	9	216	0.0142264	0.228101	0.497141
R-HSA-5610787	Hedgehog 'off' state	5	124	0.00816703	0.33792	0.497141
R-HSA-445717	Aquaporin-mediated transport	3	69	0.00454456	0.35892	0.497141
R-HSA-9758274	Regulation of NF-kappa B signaling	1	20	0.00131726	0.461088	0.497141
R-HSA-1445148	Translocation of SLC2A4 (GLUT4) to the plasma membrane	3	81	0.00533491	0.457063	0.497141
R-HSA-977606	Regulation of Complement cascade	5	139	0.00915498	0.428601	0.497141
R-HSA-69239	Synthesis of DNA	5	132	0.00869393	0.386356	0.497141
R-HSA-163685	Integration of energy metabolism	6	147	0.00968188	0.303669	0.497141
R-HSA-438064	Post NMDA receptor activation events	4	96	0.00632286	0.344996	0.497141
R-HSA-75108	Activation, myristolyation of BID and translocation to mitochondria	1	4	0.000263453	0.116245	0.497141
R-HSA-844615	The AIM2 inflammasome	1	4	0.000263453	0.116245	0.497141
R-HSA-111457	Release of apoptotic factors from the mitochondria	1	8	0.000526905	0.219003	0.497141
R-HSA-1475029	Reversible hydration of carbon dioxide	2	17	0.00111967	0.0978347	0.497141
R-HSA-2980767	Activation of NIMA Kinases NEK9, NEK6, NEK7	1	9	0.000592768	0.242772	0.497141
R-HSA-877312	Regulation of IFNG signaling	1	16	0.00105381	0.390123	0.497141
R-HSA-5684264	MAP3K8 (TPL2)-dependent MAPK1/3 activation	1	18	0.00118554	0.4267	0.497141
R-HSA-77348	Beta oxidation of octanoyl-CoA to hexanoyl-CoA	1	18	0.00118554	0.4267	0.497141
R-HSA-9708530	Regulation of BACH1 activity	1	20	0.00131726	0.461088	0.497141
R-HSA-75876	Synthesis of very long-chain fatty acyl-CoAs	2	51	0.00335902	0.467395	0.497141
R-HSA-350562	Regulation of ornithine decarboxylase (ODC)	2	51	0.00335902	0.467395	0.497141
R-HSA-69473	G2/M DNA damage checkpoint	3	80	0.00526905	0.449095	0.497141
R-HSA-69601	Ubiquitin Mediated Degradation of Phosphorylated Cdc25A	2	54	0.00355661	0.497141	0.497141
R-HSA-69613	p53-Independent G1/S DNA damage checkpoint	2	54	0.00355661	0.497141	0.497141
R-HSA-69610	p53-Independent DNA Damage Response	2	54	0.00355661	0.497141	0.497141
R-HSA-8939902	Regulation of RUNX2 expression and activity	3	83	0.00546664	0.47285	0.497141
R-HSA-195721	Signaling by WNT	12	332	0.0218666	0.331646	0.497141
R-HSA-8939211	ESR-mediated signaling	9	257	0.0169268	0.398817	0.497141
R-HSA-917937	Iron uptake and transport	3	83	0.00546664	0.47285	0.497141
R-HSA-173736	Alternative complement activation	1	6	0.000395179	0.169208	0.497141
R-HSA-2197563	NOTCH2 intracellular domain regulates transcription	2	16	0.00105381	0.0883809	0.497141
R-HSA-1538133	G0 and Early G1	3	38	0.0025028	0.114663	0.497141
R-HSA-5635838	Activation of SMO	1	20	0.00131726	0.461088	0.497141
R-HSA-196741	Cobalamin (Cbl, vitamin B12) transport and metabolism	2	52	0.00342488	0.477427	0.497141
R-HSA-1170546	Prolactin receptor signaling	1	18	0.00118554	0.4267	0.497141
R-HSA-3769402	Deactivation of the beta-catenin transactivating complex	2	44	0.00289798	0.394166	0.497141
R-HSA-2559583	Cellular Senescence	10	200	0.0131726	0.0953159	0.497141
R-HSA-69481	G2/M Checkpoints	6	153	0.0100771	0.335866	0.497141
R-HSA-3108214	SUMOylation of DNA damage response and repair proteins	3	81	0.00533491	0.457063	0.497141
R-HSA-168164	Toll Like Receptor 3 (TLR3) Cascade	6	116	0.00764012	0.152834	0.497141
R-HSA-975163	IRAK2 mediated activation of TAK1 complex upon TLR7/8 or 9 stimulation	2	18	0.00118554	0.107558	0.497141
R-HSA-9613354	Lipophagy	1	12	0.000790358	0.309835	0.497141
R-HSA-6799990	Metal sequestration by antimicrobial proteins	1	13	0.000856221	0.330845	0.497141
R-HSA-2559580	Oxidative Stress Induced Senescence	6	114	0.0075084	0.144488	0.497141
R-HSA-3270619	IRF3-mediated induction of type I IFN	1	19	0.0012514	0.44416	0.497141
R-HSA-77346	Beta oxidation of decanoyl-CoA to octanoyl-CoA-CoA	1	21	0.00138313	0.477502	0.497141
R-HSA-5687128	MAPK6/MAPK4 signaling	5	106	0.00698149	0.23228	0.497141
R-HSA-349425	Autodegradation of the E3 ubiquitin ligase COP1	2	54	0.00355661	0.497141	0.497141
R-HSA-75815	Ubiquitin-dependent degradation of Cyclin D	2	54	0.00355661	0.497141	0.497141
R-HSA-169911	Regulation of Apoptosis	2	54	0.00355661	0.497141	0.497141
R-HSA-8878159	Transcriptional regulation by RUNX3	5	118	0.00777185	0.301919	0.497141
R-HSA-9711123	Cellular response to chemical stress	11	269	0.0177172	0.214344	0.497141
R-HSA-9768759	Regulation of NPAS4 gene expression	1	22	0.00144899	0.493418	0.497141
R-HSA-73893	DNA Damage Bypass	4	57	0.0037542	0.102116	0.497141
R-HSA-5358351	Signaling by Hedgehog	6	168	0.011065	0.417432	0.497141
R-HSA-1362277	Transcription of E2F targets under negative control by DREAM complex	2	25	0.00164658	0.181201	0.497141
R-HSA-416550	Sema4D mediated inhibition of cell attachment and migration	1	15	0.000987947	0.37097	0.497141
R-HSA-5676594	TNF receptor superfamily (TNFSF) members mediating non-canonical NF-kB pathway	1	17	0.00111967	0.408694	0.497141
R-HSA-162658	Golgi Cisternae Pericentriolar Stack Reorganization	1	17	0.00111967	0.408694	0.497141
R-HSA-77288	mitochondrial fatty acid beta-oxidation of unsaturated fatty acids	1	21	0.00138313	0.477502	0.497141
R-HSA-1236978	Cross-presentation of soluble exogenous antigens (endosomes)	2	53	0.00349075	0.487343	0.497141
R-HSA-75105	Fatty acyl-CoA biosynthesis	3	82	0.00540078	0.464982	0.497141
R-HSA-1834941	STING mediated induction of host immune responses	2	24	0.00158072	0.170228	0.497141
R-HSA-983712	Ion channel transport	7	208	0.0136995	0.462109	0.497141
R-HSA-450294	MAP kinase activation	3	69	0.00454456	0.35892	0.497141
R-HSA-442755	Activation of NMDA receptors and postsynaptic events	4	113	0.00744253	0.461722	0.497141
R-HSA-6804756	Regulation of TP53 Activity through Phosphorylation	4	95	0.006257	0.338057	0.497141
R-HSA-2672351	Stimuli-sensing channels	5	120	0.00790358	0.313863	0.497141
R-HSA-499943	Interconversion of nucleotide di- and triphosphates	3	80	0.00526905	0.449095	0.497141
R-HSA-9013694	Signaling by NOTCH4	5	92	0.00605941	0.158342	0.497141
R-HSA-6791312	TP53 Regulates Transcription of Cell Cycle Genes	4	65	0.0042811	0.143907	0.497141
R-HSA-622312	Inflammasomes	2	34	0.00223935	0.282741	0.497141
R-HSA-380994	ATF4 activates genes in response to endoplasmic reticulum stress	2	34	0.00223935	0.282741	0.497141
R-HSA-399997	Acetylcholine regulates insulin secretion	1	20	0.00131726	0.461088	0.497141
R-HSA-193648	NRAGE signals death through JNK	3	64	0.00421524	0.317071	0.497141
R-HSA-448424	Interleukin-17 signaling	3	78	0.00513732	0.433021	0.497141
R-HSA-156711	Polo-like kinase mediated events	2	23	0.00151485	0.159374	0.497141
R-HSA-2262752	Cellular responses to stress	35	1005	0.0661925	0.255378	0.497141
R-HSA-111933	Calmodulin induced events	2	43	0.00283211	0.38332	0.497141
R-HSA-8953897	Cellular responses to stimuli	36	1023	0.067378	0.232278	0.497141
R-HSA-9755511	KEAP1-NFE2L2 pathway	6	141	0.0092867	0.272091	0.497141
R-HSA-419812	Calcitonin-like ligand receptors	1	11	0.000724495	0.288166	0.497141
R-HSA-8851680	Butyrophilin (BTN) family interactions	1	12	0.000790358	0.309835	0.497141
R-HSA-1482883	Acyl chain remodeling of DAG and TAG	1	17	0.00111967	0.408694	0.497141
R-HSA-1433559	Regulation of KIT signaling	1	18	0.00118554	0.4267	0.497141
R-HSA-399955	SEMA3A-Plexin repulsion signaling by inhibiting Integrin adhesion	1	20	0.00131726	0.461088	0.497141
R-HSA-111997	CaM pathway	2	43	0.00283211	0.38332	0.497141
R-HSA-8878166	Transcriptional regulation by RUNX2	5	147	0.00968188	0.47612	0.497141
R-HSA-6803207	TP53 Regulates Transcription of Caspase Activators and Caspases	2	20	0.00131726	0.127711	0.497141
R-HSA-163560	Triglyceride catabolism	2	42	0.00276625	0.372391	0.497141
R-HSA-5675221	Negative regulation of MAPK pathway	2	49	0.00322729	0.446993	0.497141
R-HSA-73621	Pyrimidine catabolism	2	51	0.00335902	0.467395	0.497141
R-HSA-9690406	Transcriptional regulation of testis differentiation	2	21	0.00138313	0.138096	0.497141
R-HSA-844456	The NLRP3 inflammasome	2	24	0.00158072	0.170228	0.497141
R-HSA-9013695	NOTCH4 Intracellular Domain Regulates Transcription	2	26	0.00171244	0.192274	0.497141
R-HSA-5661231	Metallothioneins bind metals	1	16	0.00105381	0.390123	0.497141
R-HSA-198323	AKT phosphorylates targets in the cytosol	1	16	0.00105381	0.390123	0.497141
R-HSA-1592389	Activation of Matrix Metalloproteinases	2	35	0.00230521	0.294095	0.497141
R-HSA-111996	Ca-dependent events	2	48	0.00316143	0.436629	0.497141
R-HSA-9759194	Nuclear events mediated by NFE2L2	5	106	0.00698149	0.23228	0.497141
R-HSA-1489509	DAG and IP3 signaling	2	53	0.00349075	0.487343	0.497141
R-HSA-381033	ATF6 (ATF6-alpha) activates chaperones	2	17	0.00111967	0.0978347	0.497141
R-HSA-1502540	Signaling by Activin	1	17	0.00111967	0.408694	0.497141
R-HSA-1980145	Signaling by NOTCH2	2	38	0.0025028	0.327967	0.497141
R-HSA-193704	p75 NTR receptor-mediated signalling	4	110	0.00724495	0.441495	0.497141
R-HSA-5660526	Response to metal ions	1	21	0.00138313	0.477502	0.497141
R-HSA-196757	Metabolism of folate and pterines	2	47	0.00309557	0.42616	0.497141
R-HSA-69002	DNA Replication Pre-Initiation	7	132	0.00869393	0.11799	0.497141
R-HSA-189483	Heme degradation	2	40	0.00263453	0.350309	0.497141
R-HSA-381042	PERK regulates gene expression	2	42	0.00276625	0.372391	0.497141
R-HSA-197264	Nicotinamide salvaging	3	59	0.00388593	0.275318	0.497141
R-HSA-417957	P2Y receptors	1	18	0.00118554	0.4267	0.497141
R-HSA-373076	Class A/1 (Rhodopsin-like receptors)	16	414	0.0272673	0.215352	0.497141
R-HSA-189445	Metabolism of porphyrins	3	76	0.0050056	0.416779	0.497141
R-HSA-196807	Nicotinate metabolism	4	84	0.0055325	0.26261	0.497141
R-HSA-8864260	Transcriptional regulation by the AP-2 (TFAP2) family of transcription factors	2	52	0.00342488	0.477427	0.497141
R-HSA-198725	Nuclear Events (kinase and transcription factor activation)	3	80	0.00526905	0.449095	0.497141
R-HSA-1251985	Nuclear signaling by ERBB4	2	47	0.00309557	0.42616	0.497141
R-HSA-204998	Cell death signalling via NRAGE, NRIF and NADE	3	81	0.00533491	0.457063	0.497141
R-HSA-1236394	Signaling by ERBB4	3	82	0.00540078	0.464982	0.497141
R-HSA-109581	Apoptosis	7	192	0.0126457	0.382518	0.497141
R-HSA-73884	Base Excision Repair	5	100	0.00658631	0.199382	0.497141
R-HSA-2022377	Metabolism of Angiotensinogen to Angiotensins	2	27	0.0017783	0.203433	0.497141
R-HSA-211000	Gene Silencing by RNA	6	120	0.00790358	0.170144	0.497141
R-HSA-75205	Dissolution of Fibrin Clot	1	14	0.000922084	0.351217	0.497141
R-HSA-381119	Unfolded Protein Response (UPR)	6	155	0.0102088	0.346691	0.497141
R-HSA-3108232	SUMO E3 ligases SUMOylate target proteins	6	183	0.012053	0.497748	0.497748
R-HSA-9659379	Sensory processing of sound	3	87	0.00573009	0.503773	0.503773
R-HSA-445989	TAK1-dependent IKK and NF-kappa-B activation	2	55	0.00362247	0.506819	0.506819
R-HSA-73980	RNA Polymerase III Transcription Termination	1	23	0.00151485	0.508849	0.508849
R-HSA-418217	G beta:gamma signalling through PLC beta	1	23	0.00151485	0.508849	0.508849
R-HSA-180292	GAB1 signalosome	1	23	0.00151485	0.508849	0.508849
R-HSA-500657	Presynaptic function of Kainate receptors	1	23	0.00151485	0.508849	0.508849
R-HSA-9613829	Chaperone Mediated Autophagy	1	23	0.00151485	0.508849	0.508849
R-HSA-210993	Tie2 Signaling	1	23	0.00151485	0.508849	0.508849
R-HSA-418038	Nucleotide-like (purinergic) receptors	1	23	0.00151485	0.508849	0.508849
R-HSA-196791	Vitamin D (calciferol) metabolism	1	23	0.00151485	0.508849	0.508849
R-HSA-111471	Apoptotic factor-mediated response	1	23	0.00151485	0.508849	0.508849
R-HSA-198933	Immunoregulatory interactions between a Lymphoid and a non-Lymphoid cell	10	316	0.0208128	0.512882	0.512882
R-HSA-450408	AUF1 (hnRNP D0) binds and destabilizes mRNA	2	56	0.00368834	0.516375	0.516375
R-HSA-9031628	NGF-stimulated transcription	2	56	0.00368834	0.516375	0.516375
R-HSA-6806667	Metabolism of fat-soluble vitamins	3	89	0.00586182	0.518881	0.518881
R-HSA-68886	M Phase	13	416	0.0273991	0.521645	0.521645
R-HSA-174048	APC/C:Cdc20 mediated degradation of Cyclin B	1	24	0.00158072	0.523812	0.523812
R-HSA-392851	Prostacyclin signalling through prostacyclin receptor	1	24	0.00158072	0.523812	0.523812
R-HSA-4641258	Degradation of DVL	2	57	0.0037542	0.525807	0.525807
R-HSA-4641257	Degradation of AXIN	2	57	0.0037542	0.525807	0.525807
R-HSA-8941858	Regulation of RUNX3 expression and activity	2	57	0.0037542	0.525807	0.525807
R-HSA-6803157	Antimicrobial peptides	4	123	0.00810117	0.527067	0.527067
R-HSA-418555	G alpha (s) signalling events	6	189	0.0124481	0.528855	0.528855
R-HSA-983705	Signaling by the B Cell Receptor (BCR)	6	189	0.0124481	0.528855	0.528855
R-HSA-372790	Signaling by GPCR	27	875	0.0576302	0.530129	0.530129
R-HSA-5693567	HDR through Homologous Recombination (HRR) or Single Strand Annealing (SSA)	4	124	0.00816703	0.533394	0.533394
R-HSA-1168372	Downstream signaling events of B Cell Receptor (BCR)	3	91	0.00599355	0.533737	0.533737
R-HSA-2162123	Synthesis of Prostaglandins (PG) and Thromboxanes (TX)	2	58	0.00382006	0.535114	0.535114
R-HSA-389513	CTLA4 inhibitory signaling	1	25	0.00164658	0.538319	0.538319
R-HSA-5620916	VxPx cargo-targeting to cilium	1	25	0.00164658	0.538319	0.538319
R-HSA-1181150	Signaling by NODAL	1	25	0.00164658	0.538319	0.538319
R-HSA-202733	Cell surface interactions at the vascular wall	8	257	0.0169268	0.539576	0.539576
R-HSA-5632684	Hedgehog 'on' state	3	92	0.00605941	0.541068	0.541068
R-HSA-4839726	Chromatin organization	8	258	0.0169927	0.543949	0.543949
R-HSA-3247509	Chromatin modifying enzymes	8	258	0.0169927	0.543949	0.543949
R-HSA-196849	Metabolism of water-soluble vitamins and cofactors	8	258	0.0169927	0.543949	0.543949
R-HSA-2990846	SUMOylation	6	192	0.0126457	0.544112	0.544112
R-HSA-9013409	RHOJ GTPase cycle	2	59	0.00388593	0.544296	0.544296
R-HSA-69541	Stabilization of p53	2	59	0.00388593	0.544296	0.544296
R-HSA-9013148	CDC42 GTPase cycle	5	159	0.0104722	0.544696	0.544696
R-HSA-195258	RHO GTPase Effectors	10	326	0.0214714	0.552251	0.552251
R-HSA-179409	APC-Cdc20 mediated degradation of Nek2A	1	26	0.00171244	0.552386	0.552386
R-HSA-202040	G-protein activation	1	26	0.00171244	0.552386	0.552386
R-HSA-392170	ADP signalling through P2Y purinoceptor 12	1	26	0.00171244	0.552386	0.552386
R-HSA-450321	JNK (c-Jun kinases) phosphorylation and activation mediated by activated human TAK1	1	26	0.00171244	0.552386	0.552386
R-HSA-1368082	RORA activates gene expression	1	26	0.00171244	0.552386	0.552386
R-HSA-198753	ERK/MAPK targets	1	26	0.00171244	0.552386	0.552386
R-HSA-422085	Synthesis, secretion, and deacylation of Ghrelin	1	26	0.00171244	0.552386	0.552386
R-HSA-210991	Basigin interactions	1	26	0.00171244	0.552386	0.552386
R-HSA-4085001	Sialic acid metabolism	2	60	0.00395179	0.55335	0.55335
R-HSA-983231	Factors involved in megakaryocyte development and platelet production	6	194	0.0127774	0.554162	0.554162
R-HSA-8876198	RAB GEFs exchange GTP for GDP on RABs	3	94	0.00619113	0.555528	0.555528
R-HSA-432722	Golgi Associated Vesicle Biogenesis	2	61	0.00401765	0.562276	0.562276
R-HSA-6811558	PI5P, PP2A and IER3 Regulate PI3K/AKT Signaling	4	129	0.00849634	0.564376	0.564376
R-HSA-76066	RNA Polymerase III Transcription Initiation From Type 2 Promoter	1	27	0.0017783	0.566025	0.566025
R-HSA-8949215	Mitochondrial calcium ion transport	1	27	0.0017783	0.566025	0.566025
R-HSA-9617324	Negative regulation of NMDA receptor-mediated neuronal transmission	1	27	0.0017783	0.566025	0.566025
R-HSA-450302	activated TAK1 mediates p38 MAPK activation	1	27	0.0017783	0.566025	0.566025
R-HSA-2995383	Initiation of Nuclear Envelope (NE) Reformation	1	27	0.0017783	0.566025	0.566025
R-HSA-174403	Glutathione synthesis and recycling	1	27	0.0017783	0.566025	0.566025
R-HSA-5627123	RHO GTPases activate PAKs	1	27	0.0017783	0.566025	0.566025
R-HSA-5693538	Homology Directed Repair	4	130	0.00856221	0.570436	0.570436
R-HSA-2980736	Peptide hormone metabolism	4	130	0.00856221	0.570436	0.570436
R-HSA-4551638	SUMOylation of chromatin organization proteins	2	62	0.00408351	0.571074	0.571074
R-HSA-76071	RNA Polymerase III Transcription Initiation From Type 3 Promoter	1	28	0.00184417	0.579249	0.579249
R-HSA-8964038	LDL clearance	1	28	0.00184417	0.579249	0.579249
R-HSA-76061	RNA Polymerase III Transcription Initiation From Type 1 Promoter	1	28	0.00184417	0.579249	0.579249
R-HSA-389357	CD28 dependent PI3K/Akt signaling	1	28	0.00184417	0.579249	0.579249
R-HSA-975578	Reactions specific to the complex N-glycan synthesis pathway	1	28	0.00184417	0.579249	0.579249
R-HSA-9013507	NOTCH3 Activation and Transmission of Signal to the Nucleus	1	28	0.00184417	0.579249	0.579249
R-HSA-400451	Free fatty acids regulate insulin secretion	1	28	0.00184417	0.579249	0.579249
R-HSA-200425	Carnitine metabolism	1	28	0.00184417	0.579249	0.579249
R-HSA-418597	G alpha (z) signalling events	2	63	0.00414938	0.579744	0.579744
R-HSA-9013406	RHOQ GTPase cycle	2	63	0.00414938	0.579744	0.579744
R-HSA-3858494	Beta-catenin independent WNT signaling	5	166	0.0109333	0.582682	0.582682
R-HSA-174084	Autodegradation of Cdh1 by Cdh1:APC/C	2	64	0.00421524	0.588284	0.588284
R-HSA-109606	Intrinsic Pathway for Apoptosis	2	64	0.00421524	0.588284	0.588284
R-HSA-8943723	Regulation of PTEN mRNA translation	1	29	0.00191003	0.592071	0.592071
R-HSA-392451	G beta:gamma signalling through PI3Kgamma	1	29	0.00191003	0.592071	0.592071
R-HSA-444209	Free fatty acid receptors	1	29	0.00191003	0.592071	0.592071
R-HSA-446210	Synthesis of UDP-N-acetyl-glucosamine	1	29	0.00191003	0.592071	0.592071
R-HSA-3000170	Syndecan interactions	1	29	0.00191003	0.592071	0.592071
R-HSA-9634638	Estrogen-dependent nuclear events downstream of ESR-membrane signaling	1	29	0.00191003	0.592071	0.592071
R-HSA-982772	Growth hormone receptor signaling	1	29	0.00191003	0.592071	0.592071
R-HSA-8854691	Interleukin-20 family signaling	1	29	0.00191003	0.592071	0.592071
R-HSA-2980766	Nuclear Envelope Breakdown	2	65	0.0042811	0.596694	0.596694
R-HSA-5693532	DNA Double-Strand Break Repair	5	169	0.0111309	0.598432	0.598432
R-HSA-428930	Thromboxane signalling through TP receptor	1	30	0.00197589	0.604503	0.604503
R-HSA-418592	ADP signalling through P2Y purinoceptor 1	1	30	0.00197589	0.604503	0.604503
R-HSA-5621575	CD209 (DC-SIGN) signaling	1	30	0.00197589	0.604503	0.604503
R-HSA-4608870	Asymmetric localization of PCP proteins	2	66	0.00434697	0.604976	0.604976
R-HSA-8979227	Triglyceride metabolism	2	66	0.00434697	0.604976	0.604976
R-HSA-500792	GPCR ligand binding	18	608	0.0400448	0.605748	0.605748
R-HSA-199418	Negative regulation of the PI3K/AKT network	4	137	0.00902325	0.611502	0.611502
R-HSA-180786	Extension of Telomeres	2	67	0.00441283	0.613128	0.613128
R-HSA-5693565	Recruitment and ATM-mediated phosphorylation of repair and signaling proteins at DNA double strand breaks	2	67	0.00441283	0.613128	0.613128
R-HSA-112043	PLC beta mediated events	2	67	0.00441283	0.613128	0.613128
R-HSA-1296059	G protein gated Potassium channels	1	31	0.00204176	0.616557	0.616557
R-HSA-997272	Inhibition of voltage gated Ca2+ channels via Gbeta/gamma subunits	1	31	0.00204176	0.616557	0.616557
R-HSA-1296041	Activation of G protein gated Potassium channels	1	31	0.00204176	0.616557	0.616557
R-HSA-5693554	Resolution of D-loop Structures through Synthesis-Dependent Strand Annealing (SDSA)	1	31	0.00204176	0.616557	0.616557
R-HSA-174411	Polymerase switching on the C-strand of the telomere	1	31	0.00204176	0.616557	0.616557
R-HSA-9620244	Long-term potentiation	1	31	0.00204176	0.616557	0.616557
R-HSA-389599	Alpha-oxidation of phytanate	1	31	0.00204176	0.616557	0.616557
R-HSA-3000157	Laminin interactions	1	31	0.00204176	0.616557	0.616557
R-HSA-1482801	Acyl chain remodelling of PS	1	31	0.00204176	0.616557	0.616557
R-HSA-400685	Sema4D in semaphorin signaling	1	31	0.00204176	0.616557	0.616557
R-HSA-983695	Antigen activates B Cell Receptor (BCR) leading to generation of second messengers	3	103	0.0067839	0.617099	0.617099
R-HSA-977443	GABA receptor activation	2	68	0.00447869	0.62115	0.62115
R-HSA-8873719	RAB geranylgeranylation	2	68	0.00447869	0.62115	0.62115
R-HSA-3299685	Detoxification of Reactive Oxygen Species	2	68	0.00447869	0.62115	0.62115
R-HSA-5683057	MAPK family signaling cascades	11	380	0.025028	0.627144	0.627144
R-HSA-400042	Adrenaline,noradrenaline inhibits insulin secretion	1	32	0.00210762	0.628244	0.628244
R-HSA-8934593	Regulation of RUNX1 Expression and Activity	1	32	0.00210762	0.628244	0.628244
R-HSA-9615933	Postmitotic nuclear pore complex (NPC) reformation	1	32	0.00210762	0.628244	0.628244
R-HSA-2122948	Activated NOTCH1 Transmits Signal to the Nucleus	1	32	0.00210762	0.628244	0.628244
R-HSA-8956321	Nucleotide salvage	2	69	0.00454456	0.629044	0.629044
R-HSA-400253	Circadian Clock	3	105	0.00691563	0.629972	0.629972
R-HSA-196854	Metabolism of vitamins and cofactors	11	382	0.0251597	0.633938	0.633938
R-HSA-6784531	tRNA processing in the nucleus	2	70	0.00461042	0.63681	0.63681
R-HSA-174414	Processive synthesis on the C-strand of the telomere	1	33	0.00217348	0.639576	0.639576
R-HSA-73863	RNA Polymerase I Transcription Termination	1	33	0.00217348	0.639576	0.639576
R-HSA-8866652	Synthesis of active ubiquitin: roles of E1 and E2 enzymes	1	33	0.00217348	0.639576	0.639576
R-HSA-5658442	Regulation of RAS by GAPs	2	71	0.00467628	0.644448	0.644448
R-HSA-9619483	Activation of AMPK downstream of NMDARs	1	34	0.00223935	0.650563	0.650563
R-HSA-451326	Activation of kainate receptors upon glutamate binding	1	34	0.00223935	0.650563	0.650563
R-HSA-73614	Pyrimidine salvage	1	34	0.00223935	0.650563	0.650563
R-HSA-936837	Ion transport by P-type ATPases	2	72	0.00474215	0.651958	0.651958
R-HSA-1234176	Oxygen-dependent proline hydroxylation of Hypoxia-inducible Factor Alpha	2	72	0.00474215	0.651958	0.651958
R-HSA-5358346	Hedgehog ligand biogenesis	2	72	0.00474215	0.651958	0.651958
R-HSA-112040	G-protein mediated events	2	73	0.00480801	0.659341	0.659341
R-HSA-8950505	Gene and protein expression by JAK-STAT signaling after Interleukin-12 stimulation	2	73	0.00480801	0.659341	0.659341
R-HSA-9614085	FOXO-mediated transcription	3	110	0.00724495	0.660832	0.660832
R-HSA-9615710	Late endosomal microautophagy	1	35	0.00230521	0.661216	0.661216
R-HSA-917729	Endosomal Sorting Complex Required For Transport (ESCRT)	1	35	0.00230521	0.661216	0.661216
R-HSA-180024	DARPP-32 events	1	35	0.00230521	0.661216	0.661216
R-HSA-420092	Glucagon-type ligand receptors	1	35	0.00230521	0.661216	0.661216
R-HSA-450282	MAPK targets/ Nuclear events mediated by MAP kinases	1	35	0.00230521	0.661216	0.661216
R-HSA-418990	Adherens junctions interactions	1	35	0.00230521	0.661216	0.661216
R-HSA-202403	TCR signaling	4	147	0.00968188	0.665789	0.665789
R-HSA-8854518	AURKA Activation by TPX2	2	74	0.00487387	0.666599	0.666599
R-HSA-8948751	Regulation of PTEN stability and activity	2	74	0.00487387	0.666599	0.666599
R-HSA-166786	Creation of C4 and C2 activators	3	111	0.00731081	0.666776	0.666776
R-HSA-380972	Energy dependent regulation of mTOR by LKB1-AMPK	1	36	0.00237107	0.671544	0.671544
R-HSA-1250196	SHC1 events in ERBB2 signaling	1	36	0.00237107	0.671544	0.671544
R-HSA-76046	RNA Polymerase III Transcription Initiation	1	36	0.00237107	0.671544	0.671544
R-HSA-8863795	Downregulation of ERBB2 signaling	1	36	0.00237107	0.671544	0.671544
R-HSA-9008059	Interleukin-37 signaling	1	36	0.00237107	0.671544	0.671544
R-HSA-5693606	DNA Double Strand Break Response	2	75	0.00493974	0.673731	0.673731
R-HSA-2132295	MHC class II antigen presentation	4	149	0.00981361	0.676002	0.676002
R-HSA-111885	Opioid Signalling	3	113	0.00744253	0.678435	0.678435
R-HSA-182971	EGFR downregulation	1	37	0.00243694	0.681559	0.681559
R-HSA-5693568	Resolution of D-loop Structures through Holliday Junction Intermediates	1	37	0.00243694	0.681559	0.681559
R-HSA-2129379	Molecules associated with elastic fibres	1	37	0.00243694	0.681559	0.681559
R-HSA-5694530	Cargo concentration in the ER	1	37	0.00243694	0.681559	0.681559
R-HSA-1474151	Tetrahydrobiopterin (BH4) synthesis, recycling, salvage and regulation	1	37	0.00243694	0.681559	0.681559
R-HSA-163125	Post-translational modification: synthesis of GPI-anchored proteins	3	115	0.00757426	0.68979	0.68979
R-HSA-5693537	Resolution of D-Loop Structures	1	38	0.0025028	0.691269	0.691269
R-HSA-1296065	Inwardly rectifying K+ channels	1	38	0.0025028	0.691269	0.691269
R-HSA-5668599	RHO GTPases Activate NADPH Oxidases	1	38	0.0025028	0.691269	0.691269
R-HSA-69190	DNA strand elongation	1	38	0.0025028	0.691269	0.691269
R-HSA-194315	Signaling by Rho GTPases	20	709	0.046697	0.691827	0.691827
R-HSA-8980692	RHOA GTPase cycle	4	154	0.0101429	0.70058	0.70058
R-HSA-159227	Transport of the SLBP independent Mature mRNA	1	39	0.00256866	0.700683	0.700683
R-HSA-5685938	HDR through Single Strand Annealing (SSA)	1	39	0.00256866	0.700683	0.700683
R-HSA-4085377	SUMOylation of SUMOylation proteins	1	39	0.00256866	0.700683	0.700683
R-HSA-2022928	HS-GAG biosynthesis	1	39	0.00256866	0.700683	0.700683
R-HSA-9022692	Regulation of MECP2 expression and activity	1	39	0.00256866	0.700683	0.700683
R-HSA-9006925	Intracellular signaling by second messengers	10	368	0.0242376	0.70094	0.70094
R-HSA-3000178	ECM proteoglycans	2	79	0.00520319	0.701028	0.701028
R-HSA-975634	Retinoid metabolism and transport	2	79	0.00520319	0.701028	0.701028
R-HSA-418346	Platelet homeostasis	3	118	0.00777185	0.706254	0.706254
R-HSA-351202	Metabolism of polyamines	2	80	0.00526905	0.707549	0.707549
R-HSA-159230	Transport of the SLBP Dependant Mature mRNA	1	40	0.00263453	0.709811	0.709811
R-HSA-390471	Association of TriC/CCT with target proteins during biosynthesis	1	40	0.00263453	0.709811	0.709811
R-HSA-170822	Regulation of Glucokinase by Glucokinase Regulatory Protein	1	40	0.00263453	0.709811	0.709811
R-HSA-114508	Effects of PIP2 hydrolysis	1	40	0.00263453	0.709811	0.709811
R-HSA-5607764	CLEC7A (Dectin-1) signaling	3	120	0.00790358	0.716854	0.716854
R-HSA-392518	Signal amplification	1	41	0.00270039	0.718661	0.718661
R-HSA-389356	CD28 co-stimulation	1	41	0.00270039	0.718661	0.718661
R-HSA-901042	Calnexin/calreticulin cycle	1	41	0.00270039	0.718661	0.718661
R-HSA-6814122	Cooperation of PDCL (PhLP1) and TRiC/CCT in G-protein beta folding	1	41	0.00270039	0.718661	0.718661
R-HSA-5663213	RHO GTPases Activate WASPs and WAVEs	1	41	0.00270039	0.718661	0.718661
R-HSA-5365859	RA biosynthesis pathway	1	41	0.00270039	0.718661	0.718661
R-HSA-112314	Neurotransmitter receptors and postsynaptic signal transmission	6	232	0.0152802	0.72207	0.72207
R-HSA-5633008	TP53 Regulates Transcription of Cell Death Genes	2	83	0.00546664	0.726403	0.726403
R-HSA-5693616	Presynaptic phase of homologous DNA pairing and strand exchange	1	42	0.00276625	0.727242	0.727242
R-HSA-2559585	Oncogene Induced Senescence	1	42	0.00276625	0.727242	0.727242
R-HSA-9716542	Signaling by Rho GTPases, Miro GTPases and RHOBTB3	20	725	0.0477508	0.728016	0.728016
R-HSA-8852135	Protein ubiquitination	2	84	0.0055325	0.732455	0.732455
R-HSA-1980143	Signaling by NOTCH1	2	84	0.0055325	0.732455	0.732455
R-HSA-9020591	Interleukin-12 signaling	2	84	0.0055325	0.732455	0.732455
R-HSA-2454202	Fc epsilon receptor (FCERI) signaling	6	235	0.0154778	0.733236	0.733236
R-HSA-749476	RNA Polymerase III Abortive And Retractive Initiation	1	43	0.00283211	0.735561	0.735561
R-HSA-74158	RNA Polymerase III Transcription	1	43	0.00283211	0.735561	0.735561
R-HSA-3232142	SUMOylation of ubiquitinylation proteins	1	43	0.00283211	0.735561	0.735561
R-HSA-1368108	BMAL1:CLOCK,NPAS2 activates circadian gene expression	1	43	0.00283211	0.735561	0.735561
R-HSA-6804757	Regulation of TP53 Degradation	1	43	0.00283211	0.735561	0.735561
R-HSA-202424	Downstream TCR signaling	3	124	0.00816703	0.737162	0.737162
R-HSA-9024446	NR1H2 and NR1H3-mediated signaling	2	85	0.00559837	0.738393	0.738393
R-HSA-2024096	HS-GAG degradation	1	44	0.00289798	0.743628	0.743628
R-HSA-3899300	SUMOylation of transcription cofactors	1	44	0.00289798	0.743628	0.743628
R-HSA-216083	Integrin cell surface interactions	2	86	0.00566423	0.744219	0.744219
R-HSA-1234174	Cellular response to hypoxia	2	86	0.00566423	0.744219	0.744219
R-HSA-1638091	Heparan sulfate/heparin (HS-GAG) metabolism	2	87	0.00573009	0.749933	0.749933
R-HSA-5621481	C-type lectin receptors (CLRs)	5	203	0.0133702	0.751398	0.751398
R-HSA-5693579	Homologous DNA Pairing and Strand Exchange	1	45	0.00296384	0.751449	0.751449
R-HSA-1566948	Elastic fibre formation	1	45	0.00296384	0.751449	0.751449
R-HSA-8875878	MET promotes cell motility	1	45	0.00296384	0.751449	0.751449
R-HSA-74217	Purine salvage	1	45	0.00296384	0.751449	0.751449
R-HSA-193775	Synthesis of bile acids and bile salts via 24-hydroxycholesterol	1	45	0.00296384	0.751449	0.751449
R-HSA-2995410	Nuclear Envelope (NE) Reassembly	2	88	0.00579596	0.755537	0.755537
R-HSA-2151201	Transcriptional activation of mitochondrial biogenesis	2	88	0.00579596	0.755537	0.755537
R-HSA-1592230	Mitochondrial biogenesis	3	128	0.00843048	0.756302	0.756302
R-HSA-9006931	Signaling by Nuclear Receptors	10	387	0.025489	0.756968	0.756968
R-HSA-159231	Transport of Mature mRNA Derived from an Intronless Transcript	1	46	0.0030297	0.759031	0.759031
R-HSA-8964043	Plasma lipoprotein clearance	1	46	0.0030297	0.759031	0.759031
R-HSA-9035034	RHOF GTPase cycle	1	46	0.0030297	0.759031	0.759031
R-HSA-71336	Pentose phosphate pathway	1	46	0.0030297	0.759031	0.759031
R-HSA-975576	N-glycan antennae elongation in the medial/trans-Golgi	1	46	0.0030297	0.759031	0.759031
R-HSA-5218920	VEGFR2 mediated vascular permeability	1	46	0.0030297	0.759031	0.759031
R-HSA-189451	Heme biosynthesis	1	46	0.0030297	0.759031	0.759031
R-HSA-6806003	Regulation of TP53 Expression and Degradation	1	46	0.0030297	0.759031	0.759031
R-HSA-2871809	FCERI mediated Ca+2 mobilization	3	129	0.00849634	0.760908	0.760908
R-HSA-4420097	VEGFA-VEGFR2 Pathway	3	129	0.00849634	0.760908	0.760908
R-HSA-159234	Transport of Mature mRNAs Derived from Intronless Transcripts	1	47	0.00309557	0.766383	0.766383
R-HSA-381771	Synthesis, secretion, and inactivation of Glucagon-like Peptide-1 (GLP-1)	1	47	0.00309557	0.766383	0.766383
R-HSA-9007101	Rab regulation of trafficking	3	131	0.00862807	0.769909	0.769909
R-HSA-446219	Synthesis of substrates in N-glycan biosythesis	3	131	0.00862807	0.769909	0.769909
R-HSA-9609507	Protein localization	4	170	0.0111967	0.770093	0.770093
R-HSA-71240	Tryptophan catabolism	1	48	0.00316143	0.773511	0.773511
R-HSA-1257604	PIP3 activates AKT signaling	8	321	0.0211421	0.774958	0.774958
R-HSA-5673001	RAF/MAP kinase cascade	8	322	0.0212079	0.777812	0.777812
R-HSA-68877	Mitotic Prometaphase	5	211	0.0138971	0.780261	0.780261
R-HSA-174417	Telomere C-strand (Lagging Strand) Synthesis	1	49	0.00322729	0.780422	0.780422
R-HSA-5674135	MAP2K and MAPK activation	1	49	0.00322729	0.780422	0.780422
R-HSA-8951664	Neddylation	6	249	0.0163999	0.781128	0.781128
R-HSA-68882	Mitotic Anaphase	6	249	0.0163999	0.781128	0.781128
R-HSA-450531	Regulation of mRNA stability by proteins that bind AU-rich elements	2	93	0.00612527	0.781956	0.781956
R-HSA-2500257	Resolution of Sister Chromatid Cohesion	3	134	0.00882566	0.78289	0.78289
R-HSA-2555396	Mitotic Metaphase and Anaphase	6	250	0.0164658	0.784285	0.784285
R-HSA-5419276	Mitochondrial translation termination	2	94	0.00619113	0.78693	0.78693
R-HSA-141424	Amplification of signal from the kinetochores	2	94	0.00619113	0.78693	0.78693
R-HSA-141444	Amplification of signal from unattached kinetochores via a MAD2 inhibitory signal	2	94	0.00619113	0.78693	0.78693
R-HSA-5389840	Mitochondrial translation elongation	2	94	0.00619113	0.78693	0.78693
R-HSA-73762	RNA Polymerase I Transcription Initiation	1	50	0.00329316	0.787123	0.787123
R-HSA-165159	MTOR signalling	1	50	0.00329316	0.787123	0.787123
R-HSA-71403	Citric acid cycle (TCA cycle)	1	50	0.00329316	0.787123	0.787123
R-HSA-379716	Cytosolic tRNA aminoacylation	1	50	0.00329316	0.787123	0.787123
R-HSA-2173789	TGF-beta receptor signaling activates SMADs	1	50	0.00329316	0.787123	0.787123
R-HSA-2871837	FCERI mediated NF-kB activation	4	175	0.011526	0.789033	0.789033
R-HSA-381038	XBP1(S) activates chaperone genes	2	95	0.006257	0.791804	0.791804
R-HSA-4570464	SUMOylation of RNA binding proteins	1	51	0.00335902	0.793619	0.793619
R-HSA-8854214	TBC/RABGAPs	1	51	0.00335902	0.793619	0.793619
R-HSA-400508	Incretin synthesis, secretion, and inactivation	1	51	0.00335902	0.793619	0.793619
R-HSA-1433557	Signaling by SCF-KIT	1	51	0.00335902	0.793619	0.793619
R-HSA-5653656	Vesicle-mediated transport	22	828	0.0545347	0.793884	0.793884
R-HSA-5368286	Mitochondrial translation initiation	2	96	0.00632286	0.796579	0.796579
R-HSA-390466	Chaperonin-mediated protein folding	2	96	0.00632286	0.796579	0.796579
R-HSA-447115	Interleukin-12 family signaling	2	96	0.00632286	0.796579	0.796579
R-HSA-5684996	MAPK1/MAPK3 signaling	8	329	0.021669	0.797048	0.797048
R-HSA-5633007	Regulation of TP53 Activity	4	178	0.0117236	0.799786	0.799786
R-HSA-1614558	Degradation of cysteine and homocysteine	1	52	0.00342488	0.799918	0.799918
R-HSA-5683826	Surfactant metabolism	1	52	0.00342488	0.799918	0.799918
R-HSA-173623	Classical antibody-mediated complement activation	2	97	0.00638872	0.801257	0.801257
R-HSA-15869	Metabolism of nucleotides	6	256	0.016861	0.802511	0.802511
R-HSA-6783310	Fanconi Anemia Pathway	1	53	0.00349075	0.806025	0.806025
R-HSA-77286	mitochondrial fatty acid beta-oxidation of saturated fatty acids	1	53	0.00349075	0.806025	0.806025
R-HSA-76009	Platelet Aggregation (Plug Formation)	1	53	0.00349075	0.806025	0.806025
R-HSA-194138	Signaling by VEGF	3	140	0.00922084	0.807039	0.807039
R-HSA-5620912	Anchoring of the basal body to the plasma membrane	2	99	0.00652045	0.810328	0.810328
R-HSA-373080	Class B/2 (Secretin family receptors)	2	99	0.00652045	0.810328	0.810328
R-HSA-4086400	PCP/CE pathway	2	99	0.00652045	0.810328	0.810328
R-HSA-6811440	Retrograde transport at the Trans-Golgi-Network	1	55	0.00362247	0.817686	0.817686
R-HSA-437239	Recycling pathway of L1	1	55	0.00362247	0.817686	0.817686
R-HSA-187037	Signaling by NTRK1 (TRKA)	3	143	0.00941843	0.818242	0.818242
R-HSA-381070	IRE1alpha activates chaperones	2	101	0.00665218	0.819028	0.819028
R-HSA-5368287	Mitochondrial translation	2	102	0.00671804	0.823243	0.823243
R-HSA-391251	Protein folding	2	102	0.00671804	0.823243	0.823243
R-HSA-5620920	Cargo trafficking to the periciliary membrane	1	57	0.0037542	0.828648	0.828648
R-HSA-532668	N-glycan trimming in the ER and Calnexin/Calreticulin cycle	1	57	0.0037542	0.828648	0.828648
R-HSA-2122947	NOTCH1 Intracellular Domain Regulates Transcription	1	57	0.0037542	0.828648	0.828648
R-HSA-9013405	RHOD GTPase cycle	1	57	0.0037542	0.828648	0.828648
R-HSA-2453902	The canonical retinoid cycle in rods (twilight vision)	1	57	0.0037542	0.828648	0.828648
R-HSA-77289	Mitochondrial Fatty Acid Beta-Oxidation	2	105	0.00691563	0.835364	0.835364
R-HSA-1474228	Degradation of the extracellular matrix	3	148	0.00974774	0.835685	0.835685
R-HSA-202433	Generation of second messenger molecules	1	59	0.00388593	0.838951	0.838951
R-HSA-2168880	Scavenging of heme from plasma	2	106	0.00698149	0.839234	0.839234
R-HSA-9012999	RHO GTPase cycle	11	460	0.030297	0.841805	0.841805
R-HSA-397014	Muscle contraction	5	232	0.0152802	0.843721	0.843721
R-HSA-6794361	Neurexins and neuroligins	1	60	0.00395179	0.843869	0.843869
R-HSA-9634815	Transcriptional Regulation by NPAS4	1	60	0.00395179	0.843869	0.843869
R-HSA-177929	Signaling by EGFR	1	61	0.00401765	0.848637	0.848637
R-HSA-8866654	E3 ubiquitin ligases ubiquitinate target proteins	1	61	0.00401765	0.848637	0.848637
R-HSA-3000171	Non-integrin membrane-ECM interactions	1	61	0.00401765	0.848637	0.848637
R-HSA-2467813	Separation of Sister Chromatids	4	195	0.0128433	0.852601	0.852601
R-HSA-69618	Mitotic Spindle Checkpoint	2	111	0.00731081	0.857378	0.857378
R-HSA-9009391	Extra-nuclear estrogen signaling	2	111	0.00731081	0.857378	0.857378
R-HSA-6811436	COPI-independent Golgi-to-ER retrograde traffic	1	63	0.00414938	0.857741	0.857741
R-HSA-9753281	Paracetamol ADME	1	63	0.00414938	0.857741	0.857741
R-HSA-9012852	Signaling by NOTCH3	1	63	0.00414938	0.857741	0.857741
R-HSA-9662361	Sensory processing of sound by outer hair cells of the cochlea	1	64	0.00421524	0.862086	0.862086
R-HSA-5621480	Dectin-2 family	1	65	0.0042811	0.866299	0.866299
R-HSA-429914	Deadenylation-dependent mRNA decay	1	65	0.0042811	0.866299	0.866299
R-HSA-1483166	Synthesis of PA	1	65	0.0042811	0.866299	0.866299
R-HSA-446193	Biosynthesis of the N-glycan precursor (dolichol lipid-linked oligosaccharide, LLO) and transfer to a nascent protein	3	159	0.0104722	0.869049	0.869049
R-HSA-9029569	NR1H3 & NR1H2 regulate gene expression linked to cholesterol transport and efflux	1	66	0.00434697	0.870383	0.870383
R-HSA-416476	G alpha (q) signalling events	6	284	0.0187051	0.872173	0.872173
R-HSA-194441	Metabolism of non-coding RNA	1	67	0.00441283	0.874343	0.874343
R-HSA-191859	snRNP Assembly	1	67	0.00441283	0.874343	0.874343
R-HSA-9033241	Peroxisomal protein import	1	67	0.00441283	0.874343	0.874343
R-HSA-1227986	Signaling by ERBB2	1	68	0.00447869	0.878182	0.878182
R-HSA-8978934	Metabolism of cofactors	1	68	0.00447869	0.878182	0.878182
R-HSA-156590	Glutathione conjugation	1	68	0.00447869	0.878182	0.878182
R-HSA-421270	Cell-cell junction organization	1	68	0.00447869	0.878182	0.878182
R-HSA-379724	tRNA Aminoacylation	1	68	0.00447869	0.878182	0.878182
R-HSA-1474244	Extracellular matrix organization	7	328	0.0216031	0.88064	0.88064
R-HSA-352230	Amino acid transport across the plasma membrane	1	69	0.00454456	0.881904	0.881904
R-HSA-1268020	Mitochondrial protein import	1	69	0.00454456	0.881904	0.881904
R-HSA-1660499	Synthesis of PIPs at the plasma membrane	1	69	0.00454456	0.881904	0.881904
R-HSA-166520	Signaling by NTRKs	3	166	0.0109333	0.887036	0.887036
R-HSA-9648025	EML4 and NUDC in mitotic spindle formation	2	121	0.00796944	0.88817	0.88817
R-HSA-597592	Post-translational protein modification	42	1604	0.105644	0.888659	0.888659
R-HSA-380284	Loss of proteins required for interphase microtubule organization from the centrosome	1	71	0.00467628	0.889011	0.889011
R-HSA-380259	Loss of Nlp from mitotic centrosomes	1	71	0.00467628	0.889011	0.889011
R-HSA-2426168	Activation of gene expression by SREBF (SREBP)	1	71	0.00467628	0.889011	0.889011
R-HSA-373755	Semaphorin interactions	1	71	0.00467628	0.889011	0.889011
R-HSA-8848021	Signaling by PTK6	1	71	0.00467628	0.889011	0.889011
R-HSA-9006927	Signaling by Non-Receptor Tyrosine Kinases	1	71	0.00467628	0.889011	0.889011
R-HSA-2187338	Visual phototransduction	3	169	0.0111309	0.894046	0.894046
R-HSA-5685942	HDR through Homologous Recombination (HRR)	1	73	0.00480801	0.895691	0.895691
R-HSA-5362517	Signaling by Retinoic Acid	1	73	0.00480801	0.895691	0.895691
R-HSA-2871796	FCERI mediated MAPK activation	2	124	0.00816703	0.896132	0.896132
R-HSA-382556	ABC-family proteins mediated transport	2	124	0.00816703	0.896132	0.896132
R-HSA-6807070	PTEN Regulation	3	171	0.0112626	0.898501	0.898501
R-HSA-5628897	TP53 Regulates Metabolic Genes	2	126	0.00829876	0.901144	0.901144
R-HSA-3371497	HSP90 chaperone cycle for steroid hormone receptors (SHR) in the presence of ligand	1	76	0.0050056	0.904966	0.904966
R-HSA-204005	COPII-mediated vesicle transport	1	77	0.00507146	0.907871	0.907871
R-HSA-193368	Synthesis of bile acids and bile salts via 7alpha-hydroxycholesterol	1	78	0.00513732	0.910688	0.910688
R-HSA-1660661	Sphingolipid de novo biosynthesis	1	80	0.00526905	0.916065	0.916065
R-HSA-380270	Recruitment of mitotic centrosome proteins and complexes	1	81	0.00533491	0.918632	0.918632
R-HSA-159236	Transport of Mature mRNA derived from an Intron-Containing Transcript	1	81	0.00533491	0.918632	0.918632
R-HSA-1222556	ROS and RNS production in phagocytes	1	82	0.00540078	0.92112	0.92112
R-HSA-199991	Membrane Trafficking	15	668	0.0439966	0.92214	0.92214
R-HSA-9006936	Signaling by TGFB family members	2	136	0.00895739	0.92299	0.92299
R-HSA-380287	Centrosome maturation	1	83	0.00546664	0.923532	0.923532
R-HSA-1660662	Glycosphingolipid metabolism	1	86	0.00566423	0.930336	0.930336
R-HSA-3700989	Transcriptional Regulation by TP53	10	484	0.0318778	0.931677	0.931677
R-HSA-1655829	Regulation of cholesterol biosynthesis by SREBP (SREBF)	1	87	0.00573009	0.932467	0.932467
R-HSA-6806834	Signaling by MET	1	88	0.00579596	0.934533	0.934533
R-HSA-9663891	Selective autophagy	1	89	0.00586182	0.936536	0.936536
R-HSA-8956319	Nucleotide catabolism	2	144	0.00948429	0.937106	0.937106
R-HSA-72202	Transport of Mature Transcript to Cytoplasm	1	90	0.00592768	0.938478	0.938478
R-HSA-390918	Peroxisomal lipid metabolism	1	90	0.00592768	0.938478	0.938478
R-HSA-9013404	RAC2 GTPase cycle	1	92	0.00605941	0.942185	0.942185
R-HSA-1614635	Sulfur amino acid metabolism	1	92	0.00605941	0.942185	0.942185
R-HSA-6794362	Protein-protein interactions at synapses	1	93	0.00612527	0.943954	0.943954
R-HSA-5663220	RHO GTPases Activate Formins	2	149	0.00981361	0.944644	0.944644
R-HSA-6807505	RNA polymerase II transcribes snRNA genes	1	94	0.00619113	0.945669	0.945669
R-HSA-446728	Cell junction organization	1	95	0.006257	0.947332	0.947332
R-HSA-162582	Signal Transduction	80	3023	0.199104	0.947921	0.947921
R-HSA-380320	Recruitment of NuMA to mitotic centrosomes	1	97	0.00638872	0.950507	0.950507
R-HSA-388841	Costimulation by the CD28 family	1	99	0.00652045	0.953491	0.953491
R-HSA-9013423	RAC3 GTPase cycle	1	100	0.00658631	0.954915	0.954915
R-HSA-8986944	Transcriptional Regulation by MECP2	1	100	0.00658631	0.954915	0.954915
R-HSA-71406	Pyruvate metabolism and Citric Acid (TCA) cycle	1	100	0.00658631	0.954915	0.954915
R-HSA-112315	Transmission across Chemical Synapses	6	344	0.0226569	0.954937	0.954937
R-HSA-428157	Sphingolipid metabolism	2	158	0.0104064	0.956099	0.956099
R-HSA-8978868	Fatty acid metabolism	8	431	0.028387	0.956355	0.956355
R-HSA-174824	Plasma lipoprotein assembly, remodeling, and clearance	1	102	0.00671804	0.957633	0.957633
R-HSA-199977	ER to Golgi Anterograde Transport	2	164	0.0108016	0.962436	0.962436
R-HSA-2730905	Role of LAT2/NTAL/LAB on calcium mobilization	1	107	0.00704736	0.963735	0.963735
R-HSA-6807878	COPI-mediated anterograde transport	1	107	0.00704736	0.963735	0.963735
R-HSA-1296071	Potassium Channels	1	107	0.00704736	0.963735	0.963735
R-HSA-170834	Signaling by TGF-beta Receptor Complex	1	107	0.00704736	0.963735	0.963735
R-HSA-9612973	Autophagy	2	166	0.0109333	0.964347	0.964347
R-HSA-983170	Antigen Presentation: Folding, assembly and peptide loading of class I MHC	1	108	0.00711322	0.964846	0.964846
R-HSA-425397	Transport of vitamins, nucleosides, and related molecules	1	108	0.00711322	0.964846	0.964846
R-HSA-948021	Transport to the Golgi and subsequent modification	3	219	0.014424	0.965551	0.965551
R-HSA-2142753	Arachidonic acid metabolism	2	168	0.011065	0.966164	0.966164
R-HSA-70171	Glycolysis	1	110	0.00724495	0.966967	0.966967
R-HSA-1483206	Glycerophospholipid biosynthesis	3	221	0.0145558	0.967127	0.967127
R-HSA-382551	Transport of small molecules	21	971	0.0639531	0.968891	0.968891
R-HSA-1483255	PI Metabolism	1	112	0.00737667	0.96896	0.96896
R-HSA-3371453	Regulation of HSF1-mediated heat shock response	1	113	0.00744253	0.969911	0.969911
R-HSA-192105	Synthesis of bile acids and bile salts	1	113	0.00744253	0.969911	0.969911
R-HSA-611105	Respiratory electron transport	1	118	0.00777185	0.974248	0.974248
R-HSA-446203	Asparagine N-linked glycosylation	7	421	0.0277284	0.97564	0.97564
R-HSA-1630316	Glycosaminoglycan metabolism	2	181	0.0119212	0.975977	0.975977
R-HSA-376176	Signaling by ROBO receptors	3	235	0.0154778	0.976398	0.976398
R-HSA-9010553	Regulation of expression of SLITs and ROBOs	2	183	0.012053	0.977219	0.977219
R-HSA-72306	tRNA processing	2	184	0.0121188	0.977816	0.977816
R-HSA-1852241	Organelle biogenesis and maintenance	5	338	0.0222617	0.979095	0.979095
R-HSA-194068	Bile acid and bile salt metabolism	1	125	0.00823289	0.979291	0.979291
R-HSA-9013149	RAC1 GTPase cycle	2	191	0.0125799	0.981593	0.981593
R-HSA-373760	L1CAM interactions	1	130	0.00856221	0.982278	0.982278
R-HSA-392499	Metabolism of proteins	53	2214	0.145821	0.983714	0.983714
R-HSA-1500931	Cell-Cell communication	1	134	0.00882566	0.984355	0.984355
R-HSA-3371556	Cellular response to heat stress	1	135	0.00889152	0.984835	0.984835
R-HSA-9006934	Signaling by Receptor Tyrosine Kinases	11	621	0.040901	0.984936	0.984936
R-HSA-6809371	Formation of the cornified envelope	1	138	0.00908911	0.986189	0.986189
R-HSA-70326	Glucose metabolism	1	140	0.00922084	0.987024	0.987024
R-HSA-1483257	Phospholipid metabolism	4	314	0.020681	0.987773	0.987773
R-HSA-5617833	Cilium Assembly	2	210	0.0138313	0.988968	0.988968
R-HSA-8856688	Golgi-to-ER retrograde transport	1	148	0.00974774	0.989889	0.989889
R-HSA-1632852	Macroautophagy	1	150	0.00987947	0.9905	0.9905
R-HSA-163200	Respiratory electron transport, ATP synthesis by chemiosmotic coupling, and heat production by uncoupling proteins.	1	153	0.0100771	0.991349	0.991349
R-HSA-6811442	Intra-Golgi and retrograde Golgi-to-ER traffic	2	219	0.014424	0.991364	0.991364
R-HSA-2029482	Regulation of actin dynamics for phagocytic cup formation	1	158	0.0104064	0.992599	0.992599
R-HSA-112316	Neuronal System	7	490	0.0322729	0.993643	0.993643
R-HSA-425393	Transport of inorganic cations/anions and amino acids/oligopeptides	1	167	0.0109991	0.994412	0.994412
R-HSA-1428517	The citric acid (TCA) cycle and respiratory electron transport	2	238	0.0156754	0.994875	0.994875
R-HSA-2029480	Fcgamma receptor (FCGR) dependent phagocytosis	1	193	0.0127116	0.997521	0.997521
R-HSA-8957322	Metabolism of steroids	3	331	0.0218007	0.997863	0.997863
R-HSA-72766	Translation	3	339	0.0223276	0.998265	0.998265
R-HSA-6805567	Keratinization	1	226	0.0148851	0.999118	0.999118
R-HSA-9748784	Drug ADME	1	230	0.0151485	0.999222	0.999222
R-HSA-71387	Metabolism of carbohydrates	4	456	0.0300336	0.999614	0.999614
R-HSA-72203	Processing of Capped Intron-Containing Pre-mRNA	1	259	0.0170586	0.999687	0.999687
R-HSA-1266738	Developmental Biology	21	1279	0.084239	0.999698	0.999698
R-HSA-156580	Phase II - Conjugation of compounds	1	263	0.017322	0.999724	0.999724
R-HSA-212436	Generic Transcription Pathway	28	1588	0.104591	0.999762	0.999762
R-HSA-8953854	Metabolism of RNA	9	789	0.051966	0.999914	0.999914
R-HSA-422475	Axon guidance	5	585	0.0385299	0.999936	0.999936
R-HSA-73857	RNA Polymerase II Transcription	29	1730	0.113943	0.999955	0.999955
R-HSA-425407	SLC-mediated transmembrane transport	2	420	0.0276625	0.999972	0.999972
R-HSA-9675108	Nervous system development	5	621	0.040901	0.999975	0.999975
R-HSA-74160	Gene expression (Transcription)	32	1893	0.124679	0.999976	0.999976
R-HSA-556833	Metabolism of lipids	21	1446	0.0952381	0.999986	0.999986
R-HSA-71291	Metabolism of amino acids and derivatives	4	666	0.0438648	0.999999	0.999999
R-HSA-211859	Biological oxidations	1	551	0.0362906	1	1
R-HSA-1430728	Metabolism	57	3641	0.239808	1	1
R-HSA-9709957	Sensory Perception	6	1262	0.0831193	1	1

## Sheet: TwoWeek_PosGenes_Pathways
Stable Identifier	Pathway Name	Entities Found	Entities Total	Entities Ratio	Entitis pValue	Entities FDR
R-HSA-69278	Cell Cycle, Mitotic	42	596	0.0392544	1.11022e-16	3.61933e-14
R-HSA-1640170	Cell Cycle	44	734	0.0483435	1.11022e-16	3.61933e-14
R-HSA-69620	Cell Cycle Checkpoints	22	279	0.0183758	1.9091e-11	4.14274e-09
R-HSA-69206	G1/S Transition	16	150	0.00987947	1.72606e-10	2.24387e-08
R-HSA-453279	Mitotic G1 phase and G1/S transition	17	174	0.0114602	1.71947e-10	2.24387e-08
R-HSA-69205	G1/S-Specific Transcription	10	43	0.00283211	3.57351e-10	3.8594e-08
R-HSA-68886	M Phase	22	416	0.0273991	2.75672e-08	2.56375e-06
R-HSA-69275	G2/M Transition	15	212	0.013963	1.39319e-07	1.12848e-05
R-HSA-453274	Mitotic G2-G2/M phases	15	214	0.0140947	1.56856e-07	1.12937e-05
R-HSA-2555396	Mitotic Metaphase and Anaphase	16	250	0.0164658	2.00911e-07	1.30592e-05
R-HSA-2500257	Resolution of Sister Chromatid Cohesion	12	134	0.00882566	2.24927e-07	1.32707e-05
R-HSA-174143	APC/C-mediated degradation of cell cycle proteins	10	92	0.00605941	4.17996e-07	2.08998e-05
R-HSA-453276	Regulation of mitotic cell cycle	10	92	0.00605941	4.17996e-07	2.08998e-05
R-HSA-141444	Amplification of signal from unattached kinetochores via a MAD2 inhibitory signal	10	94	0.00619113	5.06975e-07	2.17999e-05
R-HSA-141424	Amplification of signal from the kinetochores	10	94	0.00619113	5.06975e-07	2.17999e-05
R-HSA-156711	Polo-like kinase mediated events	6	23	0.00151485	6.68342e-07	2.67337e-05
R-HSA-68877	Mitotic Prometaphase	14	211	0.0138971	7.82009e-07	2.97164e-05
R-HSA-68882	Mitotic Anaphase	15	249	0.0163999	1.03022e-06	3.50275e-05
R-HSA-381119	Unfolded Protein Response (UPR)	12	155	0.0102088	1.0221e-06	3.50275e-05
R-HSA-2467813	Separation of Sister Chromatids	13	195	0.0128433	1.85752e-06	5.94408e-05
R-HSA-69618	Mitotic Spindle Checkpoint	10	111	0.00731081	2.21565e-06	6.86851e-05
R-HSA-9648025	EML4 and NUDC in mitotic spindle formation	10	121	0.00796944	4.7017e-06	0.000136349
R-HSA-69481	G2/M Checkpoints	11	153	0.0100771	5.81237e-06	0.000162746
R-HSA-176408	Regulation of APC/C activators between G1/S and early anaphase	8	83	0.00546664	1.44582e-05	0.000378128
R-HSA-69306	DNA Replication	11	169	0.0111309	1.45434e-05	0.000378128
R-HSA-68867	Assembly of the pre-replicative complex	9	114	0.0075084	2.01886e-05	0.000504716
R-HSA-195258	RHO GTPase Effectors	15	326	0.0214714	2.48688e-05	0.000596852
R-HSA-5663220	RHO GTPases Activate Formins	10	149	0.00981361	2.7693e-05	0.00063694
R-HSA-381038	XBP1(S) activates chaperone genes	8	95	0.006257	3.73837e-05	0.000822441
R-HSA-381183	ATF6 (ATF6-alpha) activates chaperone genes	4	15	0.000987947	4.78674e-05	0.00100521
R-HSA-381070	IRE1alpha activates chaperones	8	101	0.00665218	5.71734e-05	0.00114347
R-HSA-69002	DNA Replication Pre-Initiation	9	132	0.00869393	6.20349e-05	0.00117866
R-HSA-176409	APC/C:Cdc20 mediated degradation of mitotic proteins	7	76	0.0050056	6.61868e-05	0.00125755
R-HSA-176814	Activation of APC/C and APC/C:Cdc20 mediated degradation of mitotic proteins	7	77	0.00507146	7.1755e-05	0.00129159
R-HSA-381033	ATF6 (ATF6-alpha) activates chaperones	4	17	0.00111967	7.74071e-05	0.00139333
R-HSA-5334118	DNA methylation	5	36	0.00237107	0.00011507	0.00195619
R-HSA-176417	Phosphorylation of Emi1	3	8	0.000526905	0.000165031	0.00280552
R-HSA-212300	PRC2 methylates histones and DNA	5	44	0.00289798	0.00028897	0.00462352
R-HSA-174184	Cdc20:Phospho-APC/C mediated degradation of Cyclin A	6	73	0.00480801	0.000402587	0.00603881
R-HSA-68949	Orc1 removal from chromatin	6	73	0.00480801	0.000402587	0.00603881
R-HSA-179419	APC:Cdc20 mediated degradation of cell cycle proteins prior to satisfation of the cell cycle checkpoint	6	74	0.00487387	0.000432257	0.00605159
R-HSA-174178	APC/C:Cdh1 mediated degradation of Cdc20 and other APC/C:Cdh1 targeted proteins in late mitosis/early G1	6	74	0.00487387	0.000432257	0.00605159
R-HSA-8939236	RUNX1 regulates transcription of genes involved in differentiation of HSCs	7	106	0.00698149	0.000492885	0.00690039
R-HSA-69242	S Phase	9	179	0.0117895	0.000576172	0.00797569
R-HSA-606279	Deposition of new CENPA-containing nucleosomes at the centromere	5	54	0.00355661	0.000725846	0.00943599
R-HSA-774815	Nucleosome assembly	5	54	0.00355661	0.000725846	0.00943599
R-HSA-174113	SCF-beta-TrCP mediated degradation of Emi1	5	55	0.00362247	0.000787453	0.00944943
R-HSA-2299718	Condensation of Prophase Chromosomes	5	55	0.00362247	0.000787453	0.00944943
R-HSA-69273	Cyclin A/B1/B2 associated events during G2/M transition	4	32	0.00210762	0.000836818	0.0100418
R-HSA-171306	Packaging Of Telomere Ends	4	34	0.00223935	0.00104548	0.0115003
R-HSA-73728	RNA Polymerase I Promoter Opening	4	34	0.00223935	0.00104548	0.0115003
R-HSA-912446	Meiotic recombination	5	58	0.00382006	0.000995784	0.0115003
R-HSA-5693607	Processing of DNA double-strand break ends	6	89	0.00586182	0.00111748	0.0122923
R-HSA-2262752	Cellular responses to stress	25	1005	0.0661925	0.00121593	0.0133753
R-HSA-69052	Switching of origins to a post-replicative state	6	94	0.00619113	0.00147197	0.0147197
R-HSA-5689880	Ub-specific processing proteases	9	206	0.0135678	0.00152147	0.0152147
R-HSA-8953897	Cellular responses to stimuli	25	1023	0.067378	0.00155005	0.0155005
R-HSA-5693538	Homology Directed Repair	7	130	0.00856221	0.0015926	0.0156144
R-HSA-69239	Synthesis of DNA	7	132	0.00869393	0.00173494	0.0156144
R-HSA-1538133	G0 and Early G1	4	38	0.0025028	0.00156781	0.0156144
R-HSA-110330	Recognition and association of DNA glycosylase with site containing an affected purine	4	39	0.00256866	0.00172231	0.0156144
R-HSA-68616	Assembly of the ORC complex at the origin of replication	4	40	0.00263453	0.00188707	0.0169836
R-HSA-68875	Mitotic Prophase	7	135	0.00889152	0.00196676	0.0177008
R-HSA-2393930	Phosphate bond hydrolysis by NUDT proteins	4	41	0.00270039	0.00206244	0.0185619
R-HSA-5668541	TNFR2 non-canonical NF-kB pathway	6	104	0.00684977	0.00243148	0.0194518
R-HSA-2559586	DNA Damage/Telomere Stress Induced Senescence	5	71	0.00467628	0.00239579	0.0194518
R-HSA-110328	Recognition and association of DNA glycosylase with site containing an affected pyrimidine	4	42	0.00276625	0.00224875	0.0194518
R-HSA-6804114	TP53 Regulates Transcription of Genes Involved in G2 Cell Cycle Arrest	3	21	0.00138313	0.00264159	0.0211327
R-HSA-427359	SIRT1 negatively regulates rRNA expression	4	45	0.00296384	0.00287676	0.0230141
R-HSA-110331	Cleavage of the damaged purine	4	45	0.00296384	0.00287676	0.0230141
R-HSA-400511	Synthesis, secretion, and inactivation of Glucose-dependent Insulinotropic Polypeptide (GIP)	3	22	0.00144899	0.00300891	0.0240713
R-HSA-69017	CDK-mediated phosphorylation and removal of Cdc6	5	75	0.00493974	0.00302483	0.0241987
R-HSA-73927	Depurination	4	46	0.0030297	0.00311022	0.0248818
R-HSA-9670095	Inhibition of DNA recombination at telomere	4	48	0.00316143	0.00361529	0.0253071
R-HSA-8936459	RUNX1 regulates genes involved in megakaryocyte differentiation and platelet function	5	78	0.00513732	0.00356913	0.0253071
R-HSA-427389	ERCC6 (CSB) and EHMT2 (G9a) positively regulate rRNA expression	4	48	0.00316143	0.00361529	0.0253071
R-HSA-69478	G2/M DNA replication checkpoint	2	7	0.000461042	0.0037898	0.0265286
R-HSA-5625886	Activated PKN1 stimulates transcription of AR (androgen receptor) regulated genes KLK2 and KLK3	4	49	0.00322729	0.00388754	0.0272128
R-HSA-427413	NoRC negatively regulates rRNA expression	5	80	0.00526905	0.00396894	0.0277826
R-HSA-69473	G2/M DNA damage checkpoint	5	80	0.00526905	0.00396894	0.0277826
R-HSA-5578749	Transcriptional regulation by small RNAs	5	81	0.00533491	0.00418042	0.0292629
R-HSA-1799339	SRP-dependent cotranslational protein targeting to membrane	6	119	0.00783771	0.00466612	0.0294509
R-HSA-75094	Formation of the Editosome	2	8	0.000526905	0.00490849	0.0294509
R-HSA-8852276	The role of GTSE1 in G2/M progression after G2 checkpoint	5	83	0.00546664	0.00462732	0.0294509
R-HSA-422085	Synthesis, secretion, and deacylation of Ghrelin	3	26	0.00171244	0.00478433	0.0294509
R-HSA-110329	Cleavage of the damaged pyrimidine	4	51	0.00335902	0.00447302	0.0294509
R-HSA-73928	Depyrimidination	4	51	0.00335902	0.00447302	0.0294509
R-HSA-5693567	HDR through Homologous Recombination (HRR) or Single Strand Annealing (SSA)	6	124	0.00816703	0.00567012	0.0340207
R-HSA-8854050	FBXL7 down-regulates AURKA during mitotic entry and in early mitosis	4	55	0.00362247	0.00581636	0.0348981
R-HSA-2980767	Activation of NIMA Kinases NEK9, NEK6, NEK7	2	9	0.000592768	0.00616033	0.036962
R-HSA-5250941	Negative epigenetic regulation of rRNA expression	5	89	0.00586182	0.00617098	0.0370259
R-HSA-72200	mRNA Editing: C to U Conversion	2	10	0.000658631	0.00754179	0.037709
R-HSA-69656	Cyclin A:Cdk2-associated events at S phase entry	5	90	0.00592768	0.0064595	0.037709
R-HSA-5693532	DNA Double-Strand Break Repair	7	169	0.0111309	0.00660939	0.037709
R-HSA-1500620	Meiosis	5	92	0.00605941	0.00706472	0.037709
R-HSA-2559582	Senescence-Associated Secretory Phenotype (SASP)	5	91	0.00599355	0.00675736	0.037709
R-HSA-5669034	TNFs bind their physiological receptors	3	30	0.00197589	0.00708054	0.037709
R-HSA-201681	TCF dependent signaling in response to WNT	8	216	0.0142264	0.0072518	0.037709
R-HSA-157118	Signaling by NOTCH	9	259	0.0170586	0.00673216	0.037709
R-HSA-6804756	Regulation of TP53 Activity through Phosphorylation	5	95	0.006257	0.00804522	0.0402261
R-HSA-73772	RNA Polymerase I Promoter Escape	4	61	0.00401765	0.00829652	0.0414826
R-HSA-73886	Chromosome Maintenance	6	136	0.00895739	0.00871241	0.043562
R-HSA-1221632	Meiotic synapsis	4	62	0.00408351	0.00876758	0.0438379
R-HSA-187577	SCF(Skp2)-mediated degradation of p27/p21	4	62	0.00408351	0.00876758	0.0438379
R-HSA-5250924	B-WICH complex positively regulates rRNA expression	4	62	0.00408351	0.00876758	0.0438379
R-HSA-3214815	HDACs deacetylate histones	4	63	0.00414938	0.00925577	0.0462789
R-HSA-73929	Base-Excision Repair, AP Site Formation	4	63	0.00414938	0.00925577	0.0462789
R-HSA-176974	Unwinding of DNA	2	12	0.000790358	0.0106797	0.0468473
R-HSA-983705	Signaling by the B Cell Receptor (BCR)	7	189	0.0124481	0.0117118	0.0468473
R-HSA-75072	mRNA Editing	2	12	0.000790358	0.0106797	0.0468473
R-HSA-201722	Formation of the beta-catenin:TCF transactivating complex	4	67	0.00441283	0.0113847	0.0468473
R-HSA-194315	Signaling by Rho GTPases	17	709	0.046697	0.0104465	0.0468473
R-HSA-6791312	TP53 Regulates Transcription of Cell Cycle Genes	4	65	0.0042811	0.0102846	0.0468473
R-HSA-73884	Base Excision Repair	5	100	0.00658631	0.00988301	0.0468473
R-HSA-174154	APC/C:Cdc20 mediated degradation of Securin	4	68	0.00447869	0.011962	0.047848
R-HSA-9759194	Nuclear events mediated by NFE2L2	5	106	0.00698149	0.012446	0.0497839
R-HSA-9716542	Signaling by Rho GTPases, Miro GTPases and RHOBTB3	17	725	0.0477508	0.012781	0.0511241
R-HSA-72766	Translation	10	339	0.0223276	0.0129233	0.0516931
R-HSA-5688426	Deubiquitination	9	289	0.0190344	0.0130713	0.0522853
R-HSA-69580	p53-Dependent G1/S DNA damage checkpoint	4	70	0.00461042	0.0131723	0.0526891
R-HSA-69563	p53-Dependent G1 DNA Damage Response	4	70	0.00461042	0.0131723	0.0526891
R-HSA-9616222	Transcriptional regulation of granulopoiesis	4	71	0.00467628	0.0138056	0.0552223
R-HSA-157579	Telomere Maintenance	5	109	0.00717908	0.0138822	0.0555287
R-HSA-5358346	Hedgehog ligand biogenesis	4	72	0.00474215	0.0144579	0.0578318
R-HSA-69615	G1/S DNA Damage Checkpoints	4	72	0.00474215	0.0144579	0.0578318
R-HSA-2514853	Condensation of Prometaphase Chromosomes	2	15	0.000987947	0.0162738	0.0650954
R-HSA-3301854	Nuclear Pore Complex (NPC) Disassembly	3	42	0.00276625	0.0173821	0.0695284
R-HSA-15869	Metabolism of nucleotides	8	256	0.016861	0.018441	0.0737639
R-HSA-211000	Gene Silencing by RNA	5	120	0.00790358	0.0200927	0.0803707
R-HSA-5250913	Positive epigenetic regulation of rRNA expression	4	80	0.00526905	0.020382	0.0815279
R-HSA-5625740	RHO GTPases activate PKNs	4	80	0.00526905	0.020382	0.0815279
R-HSA-74259	Purine catabolism	4	80	0.00526905	0.020382	0.0815279
R-HSA-8878171	Transcriptional regulation by RUNX1	8	261	0.0171903	0.0204154	0.0816617
R-HSA-162658	Golgi Cisternae Pericentriolar Stack Reorganization	2	17	0.00111967	0.0205573	0.0822291
R-HSA-211733	Regulation of activated PAK-2p34 by proteasome mediated degradation	3	50	0.00329316	0.0272423	0.085936
R-HSA-4615885	SUMOylation of DNA replication proteins	3	50	0.00329316	0.0272423	0.085936
R-HSA-1474165	Reproduction	5	123	0.00810117	0.0220569	0.085936
R-HSA-1362300	Transcription of E2F targets under negative control by p107 (RBL1) and p130 (RBL2) in complex with HDAC1	2	20	0.00131726	0.0277522	0.085936
R-HSA-350562	Regulation of ornithine decarboxylase (ODC)	3	51	0.00335902	0.0286453	0.085936
R-HSA-73854	RNA Polymerase I Promoter Clearance	4	85	0.00559837	0.0247425	0.085936
R-HSA-69202	Cyclin E associated events during G1/S transition	4	88	0.00579596	0.0276091	0.085936
R-HSA-73864	RNA Polymerase I Transcription	4	87	0.00573009	0.0266325	0.085936
R-HSA-400508	Incretin synthesis, secretion, and inactivation	3	51	0.00335902	0.0286453	0.085936
R-HSA-381771	Synthesis, secretion, and inactivation of Glucagon-like Peptide-1 (GLP-1)	3	47	0.00309557	0.0232603	0.085936
R-HSA-1912408	Pre-NOTCH Transcription and Translation	4	89	0.00586182	0.0286069	0.085936
R-HSA-977225	Amyloid fiber formation	4	89	0.00586182	0.0286069	0.085936
R-HSA-141405	Inhibition of the proteolytic activity of APC/C required for the onset of anaphase by mitotic spindle checkpoint components	2	21	0.00138313	0.030344	0.091032
R-HSA-141430	Inactivation of APC/C via direct inhibition of the APC/C complex	2	21	0.00138313	0.030344	0.091032
R-HSA-1168372	Downstream signaling events of B Cell Receptor (BCR)	4	91	0.00599355	0.0306661	0.0919983
R-HSA-1236978	Cross-presentation of soluble exogenous antigens (endosomes)	3	53	0.00349075	0.0315644	0.0946933
R-HSA-2565942	Regulation of PLK1 Activity at G2/M Transition	4	92	0.00605941	0.0317277	0.0951832
R-HSA-3108232	SUMO E3 ligases SUMOylate target proteins	6	183	0.012053	0.03185	0.0955501
R-HSA-9762114	GSK3B and BTRC:CUL1-mediated-degradation of NFE2L2	3	54	0.00355661	0.0330803	0.0992409
R-HSA-69610	p53-Independent DNA Damage Response	3	54	0.00355661	0.0330803	0.0992409
R-HSA-69601	Ubiquitin Mediated Degradation of Phosphorylated Cdc25A	3	54	0.00355661	0.0330803	0.0992409
R-HSA-69613	p53-Independent G1/S DNA damage checkpoint	3	54	0.00355661	0.0330803	0.0992409
R-HSA-349425	Autodegradation of the E3 ubiquitin ligase COP1	3	54	0.00355661	0.0330803	0.0992409
R-HSA-75815	Ubiquitin-dependent degradation of Cyclin D	3	54	0.00355661	0.0330803	0.0992409
R-HSA-169911	Regulation of Apoptosis	3	54	0.00355661	0.0330803	0.0992409
R-HSA-212165	Epigenetic regulation of gene expression	5	139	0.00915498	0.0346257	0.103877
R-HSA-3214858	RMTs methylate histone arginines	3	55	0.00362247	0.0346335	0.103901
R-HSA-5693571	Nonhomologous End-Joining (NHEJ)	3	56	0.00368834	0.0362239	0.108672
R-HSA-450408	AUF1 (hnRNP D0) binds and destabilizes mRNA	3	56	0.00368834	0.0362239	0.108672
R-HSA-9755511	KEAP1-NFE2L2 pathway	5	141	0.0092867	0.0364533	0.10936
R-HSA-4641258	Degradation of DVL	3	57	0.0037542	0.0378514	0.113554
R-HSA-4641257	Degradation of AXIN	3	57	0.0037542	0.0378514	0.113554
R-HSA-9604323	Negative regulation of NOTCH4 signaling	3	57	0.0037542	0.0378514	0.113554
R-HSA-8941858	Regulation of RUNX3 expression and activity	3	57	0.0037542	0.0378514	0.113554
R-HSA-5689603	UCH proteinases	4	98	0.00645459	0.038548	0.115644
R-HSA-174048	APC/C:Cdc20 mediated degradation of Cyclin B	2	24	0.00158072	0.0386609	0.115983
R-HSA-2990846	SUMOylation	6	192	0.0126457	0.0387448	0.116234
R-HSA-8854521	Interaction between PHLDA1 and AURKA	1	4	0.000263453	0.0500824	0.11789
R-HSA-68881	Mitotic Metaphase/Anaphase Transition	1	4	0.000263453	0.0500824	0.11789
R-HSA-179409	APC-Cdc20 mediated degradation of Nek2A	2	26	0.00171244	0.0446299	0.11789
R-HSA-5693565	Recruitment and ATM-mediated phosphorylation of repair and signaling proteins at DNA double strand breaks	3	67	0.00441283	0.0561166	0.11789
R-HSA-3214847	HATs acetylate histones	4	110	0.00724495	0.0545144	0.11789
R-HSA-174084	Autodegradation of Cdh1 by Cdh1:APC/C	3	64	0.00421524	0.0502638	0.11789
R-HSA-2980766	Nuclear Envelope Breakdown	3	65	0.0042811	0.0521799	0.11789
R-HSA-5610780	Degradation of GLI1 by the proteasome	3	62	0.00408351	0.0465375	0.11789
R-HSA-73894	DNA Repair	9	381	0.0250939	0.0589448	0.11789
R-HSA-9018519	Estrogen-dependent gene expression	5	154	0.0101429	0.0497692	0.11789
R-HSA-5610783	Degradation of GLI2 by the proteasome	3	62	0.00408351	0.0465375	0.11789
R-HSA-5610785	GLI3 is processed to GLI3R by the proteasome	3	62	0.00408351	0.0465375	0.11789
R-HSA-1362277	Transcription of E2F targets under negative control by DREAM complex	2	25	0.00164658	0.0416047	0.11789
R-HSA-2995383	Initiation of Nuclear Envelope (NE) Reformation	2	27	0.0017783	0.047734	0.11789
R-HSA-4608870	Asymmetric localization of PCP proteins	3	66	0.00434697	0.0541309	0.11789
R-HSA-5676590	NIK-->noncanonical NF-kB signaling	3	61	0.00401765	0.0447278	0.11789
R-HSA-5607761	Dectin-1 mediated noncanonical NF-kB signaling	3	66	0.00434697	0.0541309	0.11789
R-HSA-446203	Asparagine N-linked glycosylation	10	421	0.0277284	0.0466465	0.11789
R-HSA-9617828	FOXO-mediated transcription of cell cycle genes	2	27	0.0017783	0.047734	0.11789
R-HSA-69541	Stabilization of p53	3	59	0.00388593	0.0412167	0.11789
R-HSA-2559580	Oxidative Stress Induced Senescence	4	114	0.0075084	0.0605213	0.121043
R-HSA-1912422	Pre-NOTCH Expression and Processing	4	114	0.0075084	0.0605213	0.121043
R-HSA-170145	Phosphorylation of proteins involved in the G2/M transition by Cyclin A:Cdc2 complexes	1	5	0.000329316	0.062208	0.124416
R-HSA-5619507	Activation of HOX genes during differentiation	4	116	0.00764012	0.0636514	0.127303
R-HSA-5617472	Activation of anterior HOX genes in hindbrain development during early embryogenesis	4	116	0.00764012	0.0636514	0.127303
R-HSA-5658442	Regulation of RAS by GAPs	3	71	0.00467628	0.0643997	0.128799
R-HSA-195721	Signaling by WNT	8	332	0.0218666	0.0662642	0.132528
R-HSA-1169091	Activation of NF-kappaB in B cells	3	72	0.00474215	0.066554	0.133108
R-HSA-1234176	Oxygen-dependent proline hydroxylation of Hypoxia-inducible Factor Alpha	3	72	0.00474215	0.066554	0.133108
R-HSA-8854518	AURKA Activation by TPX2	3	74	0.00487387	0.0709603	0.141921
R-HSA-8948751	Regulation of PTEN stability and activity	3	74	0.00487387	0.0709603	0.141921
R-HSA-5693606	DNA Double Strand Break Response	3	75	0.00493974	0.0732117	0.146423
R-HSA-382556	ABC-family proteins mediated transport	4	124	0.00816703	0.0770011	0.154002
R-HSA-202424	Downstream TCR signaling	4	124	0.00816703	0.0770011	0.154002
R-HSA-68962	Activation of the pre-replicative complex	2	36	0.00237107	0.0788257	0.157651
R-HSA-9013508	NOTCH3 Intracellular Domain Regulates Transcription	2	36	0.00237107	0.0788257	0.157651
R-HSA-392499	Metabolism of proteins	36	2214	0.145821	0.0789957	0.157991
R-HSA-5633007	Regulation of TP53 Activity	5	178	0.0117236	0.0809638	0.161928
R-HSA-351202	Metabolism of polyamines	3	80	0.00526905	0.0849356	0.169871
R-HSA-68911	G2 Phase	1	7	0.000461042	0.0859993	0.171999
R-HSA-69190	DNA strand elongation	2	38	0.0025028	0.0864081	0.172816
R-HSA-597592	Post-translational protein modification	27	1604	0.105644	0.0882136	0.176427
R-HSA-446219	Synthesis of substrates in N-glycan biosythesis	4	131	0.00862807	0.0897409	0.179482
R-HSA-176187	Activation of ATR in response to replication stress	2	39	0.00256866	0.0902785	0.180557
R-HSA-8939902	Regulation of RUNX2 expression and activity	3	83	0.00546664	0.0923299	0.18466
R-HSA-3700989	Transcriptional Regulation by TP53	10	484	0.0318778	0.0961622	0.192324
R-HSA-68689	CDC6 association with the ORC:origin complex	1	8	0.000526905	0.0976687	0.195337
R-HSA-9768919	NPAS4 regulates expression of target genes	2	41	0.00270039	0.0981683	0.196337
R-HSA-1234174	Cellular response to hypoxia	3	86	0.00566423	0.0999812	0.199962
R-HSA-2995410	Nuclear Envelope (NE) Reassembly	3	88	0.00579596	0.105219	0.210439
R-HSA-113507	E2F-enabled inhibition of pre-replication complex formation	1	9	0.000592768	0.10919	0.21838
R-HSA-480985	Synthesis of dolichyl-phosphate-glucose	1	9	0.000592768	0.10919	0.21838
R-HSA-195253	Degradation of beta-catenin by the destruction complex	3	91	0.00599355	0.113274	0.226548
R-HSA-203641	NOSTRIN mediated eNOS trafficking	1	10	0.000658631	0.120565	0.226659
R-HSA-1169092	Activation of RAS in B cells	1	11	0.000724495	0.131795	0.226659
R-HSA-3000484	Scavenging by Class F Receptors	1	16	0.00105381	0.185842	0.226659
R-HSA-193648	NRAGE signals death through JNK	2	64	0.00421524	0.19899	0.226659
R-HSA-983695	Antigen activates B Cell Receptor (BCR) leading to generation of second messengers	3	103	0.0067839	0.147645	0.226659
R-HSA-1462054	Alpha-defensins	1	11	0.000724495	0.131795	0.226659
R-HSA-2468052	Establishment of Sister Chromatid Cohesion	1	13	0.000856221	0.15383	0.226659
R-HSA-110362	POLB-Dependent Long Patch Base Excision Repair	1	15	0.000987947	0.175308	0.226659
R-HSA-176412	Phosphorylation of the APC/C	1	20	0.00131726	0.226659	0.226659
R-HSA-379716	Cytosolic tRNA aminoacylation	2	50	0.00329316	0.135772	0.226659
R-HSA-429914	Deadenylation-dependent mRNA decay	2	65	0.0042811	0.203644	0.226659
R-HSA-1236974	ER-Phagosome pathway	4	173	0.0113943	0.184081	0.226659
R-HSA-5685939	HDR through MMEJ (alt-NHEJ)	1	17	0.00111967	0.196243	0.226659
R-HSA-210455	Astrocytic Glutamate-Glutamine Uptake And Metabolism	1	10	0.000658631	0.120565	0.226659
R-HSA-112313	Neurotransmitter uptake and metabolism In glial cells	1	10	0.000658631	0.120565	0.226659
R-HSA-446205	Synthesis of GDP-mannose	1	11	0.000724495	0.131795	0.226659
R-HSA-77108	Utilization of Ketone Bodies	1	14	0.000922084	0.164637	0.226659
R-HSA-4655427	SUMOylation of DNA methylation proteins	1	16	0.00105381	0.185842	0.226659
R-HSA-1679131	Trafficking and processing of endosomal TLR	1	16	0.00105381	0.185842	0.226659
R-HSA-202403	TCR signaling	4	147	0.00968188	0.122326	0.226659
R-HSA-4551638	SUMOylation of chromatin organization proteins	2	62	0.00408351	0.189723	0.226659
R-HSA-2465910	MASTL Facilitates Mitotic Progression	1	12	0.000790358	0.142883	0.226659
R-HSA-1280218	Adaptive Immune System	17	1012	0.0666535	0.1568	0.226659
R-HSA-379724	tRNA Aminoacylation	2	68	0.00447869	0.217676	0.226659
R-HSA-6799990	Metal sequestration by antimicrobial proteins	1	13	0.000856221	0.15383	0.226659
R-HSA-8963888	Chylomicron assembly	1	14	0.000922084	0.164637	0.226659
R-HSA-75035	Chk1/Chk2(Cds1) mediated inactivation of Cyclin B:Cdk1 complex	1	15	0.000987947	0.175308	0.226659
R-HSA-70350	Fructose catabolism	1	20	0.00131726	0.226659	0.226659
R-HSA-3000480	Scavenging by Class A Receptors	2	49	0.00322729	0.131446	0.226659
R-HSA-71403	Citric acid cycle (TCA cycle)	2	50	0.00329316	0.135772	0.226659
R-HSA-8939211	ESR-mediated signaling	6	257	0.0169268	0.115459	0.226659
R-HSA-975577	N-Glycan antennae elongation	1	19	0.0012514	0.21665	0.226659
R-HSA-198933	Immunoregulatory interactions between a Lymphoid and a non-Lymphoid cell	6	316	0.0208128	0.222492	0.226659
R-HSA-6803157	Antimicrobial peptides	3	123	0.00810117	0.210974	0.226659
R-HSA-5358351	Signaling by Hedgehog	4	168	0.011065	0.171479	0.226659
R-HSA-442660	Na+/Cl- dependent neurotransmitter transporters	2	51	0.00335902	0.140128	0.226659
R-HSA-418889	Caspase activation via Dependence Receptors in the absence of ligand	1	12	0.000790358	0.142883	0.226659
R-HSA-8866654	E3 ubiquitin ligases ubiquitinate target proteins	2	61	0.00401765	0.185112	0.226659
R-HSA-5610787	Hedgehog 'off' state	3	124	0.00816703	0.21429	0.226659
R-HSA-2559583	Cellular Senescence	5	200	0.0131726	0.116858	0.226659
R-HSA-8956319	Nucleotide catabolism	4	144	0.00948429	0.115868	0.226659
R-HSA-380108	Chemokine receptors bind chemokines	2	57	0.0037542	0.166847	0.226659
R-HSA-212436	Generic Transcription Pathway	25	1588	0.104591	0.167497	0.226659
R-HSA-73857	RNA Polymerase II Transcription	26	1730	0.113943	0.225779	0.226659
R-HSA-6785807	Interleukin-4 and Interleukin-13 signaling	5	211	0.0138971	0.137219	0.226659
R-HSA-446193	Biosynthesis of the N-glycan precursor (dolichol lipid-linked oligosaccharide, LLO) and transfer to a nascent protein	4	159	0.0104722	0.149617	0.226659
R-HSA-8953750	Transcriptional Regulation by E2F6	2	46	0.0030297	0.118675	0.226659
R-HSA-9711123	Cellular response to chemical stress	6	269	0.0177172	0.134679	0.226659
R-HSA-8878166	Transcriptional regulation by RUNX2	4	147	0.00968188	0.122326	0.226659
R-HSA-6804116	TP53 Regulates Transcription of Genes Involved in G1 Cell Cycle Arrest	1	20	0.00131726	0.226659	0.226659
R-HSA-5632684	Hedgehog 'on' state	3	92	0.00605941	0.11601	0.226659
R-HSA-9012852	Signaling by NOTCH3	2	63	0.00414938	0.194349	0.226659
R-HSA-9013694	Signaling by NOTCH4	3	92	0.00605941	0.11601	0.226659
R-HSA-5607764	CLEC7A (Dectin-1) signaling	3	120	0.00790358	0.201098	0.226659
R-HSA-4086400	PCP/CE pathway	3	99	0.00652045	0.135831	0.226659
R-HSA-450531	Regulation of mRNA stability by proteins that bind AU-rich elements	3	93	0.00612527	0.11877	0.226659
R-HSA-3299685	Detoxification of Reactive Oxygen Species	2	68	0.00447869	0.217676	0.226659
R-HSA-5687128	MAPK6/MAPK4 signaling	3	106	0.00698149	0.156717	0.226659
R-HSA-9634815	Transcriptional Regulation by NPAS4	2	60	0.00395179	0.180518	0.226659
R-HSA-8878159	Transcriptional regulation by RUNX3	3	118	0.00777185	0.194577	0.226659
R-HSA-9020702	Interleukin-1 signaling	3	125	0.00823289	0.217617	0.226659
R-HSA-5357801	Programmed Cell Death	5	234	0.015412	0.184325	0.226659
R-HSA-2980736	Peptide hormone metabolism	3	130	0.00856221	0.234407	0.234407
R-HSA-109581	Apoptosis	4	192	0.0126457	0.234436	0.234436
R-HSA-5690714	CD22 mediated BCR regulation	2	72	0.00474215	0.236507	0.236507
R-HSA-430039	mRNA decay by 5' to 3' exoribonuclease	1	21	0.00138313	0.236541	0.236541
R-HSA-6787639	GDP-fucose biosynthesis	1	21	0.00138313	0.236541	0.236541
R-HSA-3247509	Chromatin modifying enzymes	5	258	0.0169927	0.238802	0.238802
R-HSA-4839726	Chromatin organization	5	258	0.0169927	0.238802	0.238802
R-HSA-74160	Gene expression (Transcription)	28	1893	0.124679	0.240339	0.240339
R-HSA-1236975	Antigen processing-Cross presentation	4	195	0.0128433	0.242684	0.242684
R-HSA-176407	Conversion from APC/C:Cdc20 to APC/C:Cdh1 in late anaphase	1	22	0.00144899	0.246298	0.246298
R-HSA-6798163	Choline catabolism	1	22	0.00144899	0.246298	0.246298
R-HSA-9013026	RHOB GTPase cycle	2	75	0.00493974	0.25069	0.25069
R-HSA-4419969	Depolymerisation of the Nuclear Lamina	1	23	0.00151485	0.25593	0.25593
R-HSA-5625900	RHO GTPases activate CIT	1	23	0.00151485	0.25593	0.25593
R-HSA-429958	mRNA decay by 3' to 5' exoribonuclease	1	24	0.00158072	0.26544	0.26544
R-HSA-113510	E2F mediated regulation of DNA replication	1	24	0.00158072	0.26544	0.26544
R-HSA-499943	Interconversion of nucleotide di- and triphosphates	2	80	0.00526905	0.27437	0.27437
R-HSA-1362409	Mitochondrial iron-sulfur cluster biogenesis	1	25	0.00164658	0.274829	0.274829
R-HSA-977347	Serine biosynthesis	1	25	0.00164658	0.274829	0.274829
R-HSA-77111	Synthesis of Ketone Bodies	1	25	0.00164658	0.274829	0.274829
R-HSA-159236	Transport of Mature mRNA derived from an Intron-Containing Transcript	2	81	0.00533491	0.279105	0.279105
R-HSA-380270	Recruitment of mitotic centrosome proteins and complexes	2	81	0.00533491	0.279105	0.279105
R-HSA-3108214	SUMOylation of DNA damage response and repair proteins	2	81	0.00533491	0.279105	0.279105
R-HSA-204998	Cell death signalling via NRAGE, NRIF and NADE	2	81	0.00533491	0.279105	0.279105
R-HSA-210991	Basigin interactions	1	26	0.00171244	0.284098	0.284098
R-HSA-380287	Centrosome maturation	2	83	0.00546664	0.288568	0.288568
R-HSA-5652084	Fructose metabolism	1	27	0.0017783	0.29325	0.29325
R-HSA-174403	Glutathione synthesis and recycling	1	27	0.0017783	0.29325	0.29325
R-HSA-8852135	Protein ubiquitination	2	84	0.0055325	0.293295	0.293295
R-HSA-8964038	LDL clearance	1	28	0.00184417	0.302285	0.302285
R-HSA-74182	Ketone body metabolism	1	29	0.00191003	0.311205	0.311205
R-HSA-446210	Synthesis of UDP-N-acetyl-glucosamine	1	29	0.00191003	0.311205	0.311205
R-HSA-8963898	Plasma lipoprotein assembly	1	30	0.00197589	0.320012	0.320012
R-HSA-72202	Transport of Mature Transcript to Cytoplasm	2	90	0.00592768	0.321546	0.321546
R-HSA-5693554	Resolution of D-loop Structures through Synthesis-Dependent Strand Annealing (SDSA)	1	31	0.00204176	0.328707	0.328707
R-HSA-3214842	HDMs demethylate histones	1	31	0.00204176	0.328707	0.328707
R-HSA-1482801	Acyl chain remodelling of PS	1	31	0.00204176	0.328707	0.328707
R-HSA-9615933	Postmitotic nuclear pore complex (NPC) reformation	1	32	0.00210762	0.337291	0.337291
R-HSA-5689901	Metalloprotease DUBs	1	32	0.00210762	0.337291	0.337291
R-HSA-110373	Resolution of AP sites via the multiple-nucleotide patch replacement pathway	1	32	0.00210762	0.337291	0.337291
R-HSA-5357769	Caspase activation via extrinsic apoptotic signalling pathway	1	32	0.00210762	0.337291	0.337291
R-HSA-5419276	Mitochondrial translation termination	2	94	0.00619113	0.340231	0.340231
R-HSA-5389840	Mitochondrial translation elongation	2	94	0.00619113	0.340231	0.340231
R-HSA-4641262	Disassembly of the destruction complex and recruitment of AXIN to the membrane	1	33	0.00217348	0.345766	0.345766
R-HSA-5368286	Mitochondrial translation initiation	2	96	0.00632286	0.349516	0.349516
R-HSA-171319	Telomere Extension By Telomerase	1	34	0.00223935	0.354133	0.354133
R-HSA-73614	Pyrimidine salvage	1	34	0.00223935	0.354133	0.354133
R-HSA-5620971	Pyroptosis	1	34	0.00223935	0.354133	0.354133
R-HSA-380320	Recruitment of NuMA to mitotic centrosomes	2	97	0.00638872	0.354142	0.354142
R-HSA-425366	Transport of bile salts and organic acids, metal ions and amine compounds	3	165	0.0108674	0.35571	0.35571
R-HSA-3858494	Beta-catenin independent WNT signaling	3	166	0.0109333	0.359193	0.359193
R-HSA-1592389	Activation of Matrix Metalloproteinases	1	35	0.00230521	0.362394	0.362394
R-HSA-2173782	Binding and Uptake of Ligands by Scavenger Receptors	3	168	0.011065	0.366151	0.366151
R-HSA-71406	Pyruvate metabolism and Citric Acid (TCA) cycle	2	100	0.00658631	0.367949	0.367949
R-HSA-2022854	Keratan sulfate biosynthesis	1	36	0.00237107	0.37055	0.37055
R-HSA-6807070	PTEN Regulation	3	171	0.0112626	0.376565	0.376565
R-HSA-5368287	Mitochondrial translation	2	102	0.00671804	0.377091	0.377091
R-HSA-174824	Plasma lipoprotein assembly, remodeling, and clearance	2	102	0.00671804	0.377091	0.377091
R-HSA-5693568	Resolution of D-loop Structures through Holliday Junction Intermediates	1	37	0.00243694	0.378601	0.378601
R-HSA-203615	eNOS activation	1	37	0.00243694	0.378601	0.378601
R-HSA-5694530	Cargo concentration in the ER	1	37	0.00243694	0.378601	0.378601
R-HSA-9006931	Signaling by Nuclear Receptors	6	387	0.025489	0.378762	0.378762
R-HSA-983168	Antigen processing: Ubiquitination & Proteasome degradation	5	315	0.0207469	0.380166	0.380166
R-HSA-5693537	Resolution of D-Loop Structures	1	38	0.0025028	0.386551	0.386551
R-HSA-9013407	RHOH GTPase cycle	1	38	0.0025028	0.386551	0.386551
R-HSA-2173795	Downregulation of SMAD2/3:SMAD4 transcriptional activity	1	38	0.0025028	0.386551	0.386551
R-HSA-2871837	FCERI mediated NF-kB activation	3	175	0.011526	0.390396	0.390396
R-HSA-159227	Transport of the SLBP independent Mature mRNA	1	39	0.00256866	0.394399	0.394399
R-HSA-5685938	HDR through Single Strand Annealing (SSA)	1	39	0.00256866	0.394399	0.394399
R-HSA-4085377	SUMOylation of SUMOylation proteins	1	39	0.00256866	0.394399	0.394399
R-HSA-9022692	Regulation of MECP2 expression and activity	1	39	0.00256866	0.394399	0.394399
R-HSA-159230	Transport of the SLBP Dependant Mature mRNA	1	40	0.00263453	0.402147	0.402147
R-HSA-5696394	DNA Damage Recognition in GG-NER	1	40	0.00263453	0.402147	0.402147
R-HSA-170822	Regulation of Glucokinase by Glucokinase Regulatory Protein	1	40	0.00263453	0.402147	0.402147
R-HSA-983170	Antigen Presentation: Folding, assembly and peptide loading of class I MHC	2	108	0.00711322	0.404176	0.404176
R-HSA-8957275	Post-translational protein phosphorylation	2	109	0.00717908	0.408637	0.408637
R-HSA-381340	Transcriptional regulation of white adipocyte differentiation	2	109	0.00717908	0.408637	0.408637
R-HSA-5696400	Dual Incision in GG-NER	1	41	0.00270039	0.409797	0.409797
R-HSA-202131	Metabolism of nitric oxide: NOS3 activation and regulation	1	41	0.00270039	0.409797	0.409797
R-HSA-901042	Calnexin/calreticulin cycle	1	41	0.00270039	0.409797	0.409797
R-HSA-193704	p75 NTR receptor-mediated signalling	2	110	0.00724495	0.413082	0.413082
R-HSA-9614085	FOXO-mediated transcription	2	110	0.00724495	0.413082	0.413082
R-HSA-202430	Translocation of ZAP-70 to Immunological synapse	1	42	0.00276625	0.417349	0.417349
R-HSA-5693616	Presynaptic phase of homologous DNA pairing and strand exchange	1	42	0.00276625	0.417349	0.417349
R-HSA-1482839	Acyl chain remodelling of PE	1	42	0.00276625	0.417349	0.417349
R-HSA-163560	Triglyceride catabolism	1	42	0.00276625	0.417349	0.417349
R-HSA-9009391	Extra-nuclear estrogen signaling	2	111	0.00731081	0.41751	0.41751
R-HSA-9010553	Regulation of expression of SLITs and ROBOs	3	183	0.012053	0.417819	0.417819
R-HSA-446652	Interleukin-1 family signaling	3	183	0.012053	0.417819	0.417819
R-HSA-983169	Class I MHC mediated antigen processing & presentation	7	479	0.0315484	0.418468	0.418468
R-HSA-6798695	Neutrophil degranulation	7	480	0.0316143	0.420561	0.420561
R-HSA-9696273	RND1 GTPase cycle	1	43	0.00283211	0.424805	0.424805
R-HSA-9696264	RND3 GTPase cycle	1	43	0.00283211	0.424805	0.424805
R-HSA-3232142	SUMOylation of ubiquitinylation proteins	1	43	0.00283211	0.424805	0.424805
R-HSA-114604	GPVI-mediated activation cascade	1	43	0.00283211	0.424805	0.424805
R-HSA-6804757	Regulation of TP53 Degradation	1	43	0.00283211	0.424805	0.424805
R-HSA-9696270	RND2 GTPase cycle	1	44	0.00289798	0.432166	0.432166
R-HSA-8953854	Metabolism of RNA	11	789	0.051966	0.434063	0.434063
R-HSA-202427	Phosphorylation of CD3 and TCR zeta chains	1	45	0.00296384	0.439433	0.439433
R-HSA-5693579	Homologous DNA Pairing and Strand Exchange	1	45	0.00296384	0.439433	0.439433
R-HSA-389948	PD-1 signaling	1	45	0.00296384	0.439433	0.439433
R-HSA-159231	Transport of Mature mRNA Derived from an Intronless Transcript	1	46	0.0030297	0.446608	0.446608
R-HSA-9035034	RHOF GTPase cycle	1	46	0.0030297	0.446608	0.446608
R-HSA-5218920	VEGFR2 mediated vascular permeability	1	46	0.0030297	0.446608	0.446608
R-HSA-975576	N-glycan antennae elongation in the medial/trans-Golgi	1	46	0.0030297	0.446608	0.446608
R-HSA-6806003	Regulation of TP53 Expression and Degradation	1	46	0.0030297	0.446608	0.446608
R-HSA-8964043	Plasma lipoprotein clearance	1	46	0.0030297	0.446608	0.446608
R-HSA-159234	Transport of Mature mRNAs Derived from Intronless Transcripts	1	47	0.00309557	0.453692	0.453692
R-HSA-5696395	Formation of Incision Complex in GG-NER	1	47	0.00309557	0.453692	0.453692
R-HSA-73817	Purine ribonucleoside monophosphate biosynthesis	1	48	0.00316143	0.460685	0.460685
R-HSA-73933	Resolution of Abasic Sites (AP sites)	1	48	0.00316143	0.460685	0.460685
R-HSA-1461973	Defensins	1	51	0.00335902	0.481135	0.481135
R-HSA-4570464	SUMOylation of RNA binding proteins	1	51	0.00335902	0.481135	0.481135
R-HSA-1638074	Keratan sulfate/keratin metabolism	1	51	0.00335902	0.481135	0.481135
R-HSA-3214841	PKMTs methylate histone lysines	1	51	0.00335902	0.481135	0.481135
R-HSA-75876	Synthesis of very long-chain fatty acyl-CoAs	1	51	0.00335902	0.481135	0.481135
R-HSA-5628897	TP53 Regulates Metabolic Genes	2	126	0.00829876	0.481773	0.481773
R-HSA-375276	Peptide ligand-binding receptors	3	203	0.0133702	0.484398	0.484398
R-HSA-5621481	C-type lectin receptors (CLRs)	3	203	0.0133702	0.484398	0.484398
R-HSA-381426	Regulation of Insulin-like Growth Factor (IGF) transport and uptake by Insulin-like Growth Factor Binding Proteins (IGFBPs)	2	127	0.00836462	0.485903	0.485903
R-HSA-2029485	Role of phospholipids in phagocytosis	2	129	0.00849634	0.494101	0.494101
R-HSA-6783310	Fanconi Anemia Pathway	1	53	0.00349075	0.494338	0.494338
R-HSA-1483191	Synthesis of PC	1	55	0.00362247	0.507206	0.507206
R-HSA-532668	N-glycan trimming in the ER and Calnexin/Calreticulin cycle	1	57	0.0037542	0.519749	0.519749
R-HSA-9013405	RHOD GTPase cycle	1	57	0.0037542	0.519749	0.519749
R-HSA-70895	Branched-chain amino acid catabolism	1	58	0.00382006	0.525901	0.525901
R-HSA-9013409	RHOJ GTPase cycle	1	59	0.00388593	0.531974	0.531974
R-HSA-202433	Generation of second messenger molecules	1	59	0.00388593	0.531974	0.531974
R-HSA-977606	Regulation of Complement cascade	2	139	0.00915498	0.533833	0.533833
R-HSA-72187	mRNA 3'-end processing	1	60	0.00395179	0.53797	0.53797
R-HSA-1483206	Glycerophospholipid biosynthesis	3	221	0.0145558	0.541092	0.541092
R-HSA-445355	Smooth Muscle Contraction	1	61	0.00401765	0.543889	0.543889
R-HSA-8956320	Nucleotide biosynthesis	1	61	0.00401765	0.543889	0.543889
R-HSA-9013406	RHOQ GTPase cycle	1	63	0.00414938	0.555503	0.555503
R-HSA-2173793	Transcriptional activity of SMAD2/SMAD3:SMAD4 heterotrimer	1	64	0.00421524	0.561199	0.561199
R-HSA-2132295	MHC class II antigen presentation	2	149	0.00981361	0.571391	0.571391
R-HSA-8979227	Triglyceride metabolism	1	66	0.00434697	0.572374	0.572374
R-HSA-194441	Metabolism of non-coding RNA	1	67	0.00441283	0.577855	0.577855
R-HSA-191859	snRNP Assembly	1	67	0.00441283	0.577855	0.577855
R-HSA-180786	Extension of Telomeres	1	67	0.00441283	0.577855	0.577855
R-HSA-376176	Signaling by ROBO receptors	3	235	0.0154778	0.582639	0.582639
R-HSA-2454202	Fc epsilon receptor (FCERI) signaling	3	235	0.0154778	0.582639	0.582639
R-HSA-983189	Kinesins	1	68	0.00447869	0.583266	0.583266
R-HSA-156590	Glutathione conjugation	1	68	0.00447869	0.583266	0.583266
R-HSA-1268020	Mitochondrial protein import	1	69	0.00454456	0.588608	0.588608
R-HSA-73856	RNA Polymerase II Transcription Termination	1	69	0.00454456	0.588608	0.588608
R-HSA-8956321	Nucleotide salvage	1	69	0.00454456	0.588608	0.588608
R-HSA-1442490	Collagen degradation	1	69	0.00454456	0.588608	0.588608
R-HSA-352230	Amino acid transport across the plasma membrane	1	69	0.00454456	0.588608	0.588608
R-HSA-8980692	RHOA GTPase cycle	2	154	0.0101429	0.589335	0.589335
R-HSA-1257604	PIP3 activates AKT signaling	4	321	0.0211421	0.592399	0.592399
R-HSA-6784531	tRNA processing in the nucleus	1	70	0.00461042	0.593882	0.593882
R-HSA-9707616	Heme signaling	1	70	0.00461042	0.593882	0.593882
R-HSA-5673001	RAF/MAP kinase cascade	4	322	0.0212079	0.59485	0.59485
R-HSA-166658	Complement cascade	2	156	0.0102746	0.596356	0.596356
R-HSA-380284	Loss of proteins required for interphase microtubule organization from the centrosome	1	71	0.00467628	0.599088	0.599088
R-HSA-380259	Loss of Nlp from mitotic centrosomes	1	71	0.00467628	0.599088	0.599088
R-HSA-6782315	tRNA modification in the nucleus and cytosol	1	72	0.00474215	0.604228	0.604228
R-HSA-5685942	HDR through Homologous Recombination (HRR)	1	73	0.00480801	0.609303	0.609303
R-HSA-5218859	Regulated Necrosis	1	73	0.00480801	0.609303	0.609303
R-HSA-5684996	MAPK1/MAPK3 signaling	4	329	0.021669	0.611761	0.611761
R-HSA-449147	Signaling by Interleukins	8	658	0.0433379	0.612231	0.612231
R-HSA-8951664	Neddylation	3	249	0.0163999	0.621745	0.621745
R-HSA-73887	Death Receptor Signalling	2	164	0.0108016	0.623543	0.623543
R-HSA-1650814	Collagen biosynthesis and modifying enzymes	1	76	0.0050056	0.624142	0.624142
R-HSA-204005	COPII-mediated vesicle transport	1	77	0.00507146	0.628962	0.628962
R-HSA-9013408	RHOG GTPase cycle	1	78	0.00513732	0.633721	0.633721
R-HSA-9013106	RHOC GTPase cycle	1	79	0.00520319	0.638419	0.638419
R-HSA-72203	Processing of Capped Intron-Containing Pre-mRNA	3	259	0.0170586	0.648119	0.648119
R-HSA-75105	Fatty acyl-CoA biosynthesis	1	82	0.00540078	0.652158	0.652158
R-HSA-917937	Iron uptake and transport	1	83	0.00546664	0.656621	0.656621
R-HSA-1169408	ISG15 antiviral mechanism	1	83	0.00546664	0.656621	0.656621
R-HSA-196807	Nicotinate metabolism	1	84	0.0055325	0.661027	0.661027
R-HSA-383280	Nuclear Receptor transcription pathway	1	86	0.00566423	0.669671	0.669671
R-HSA-6796648	TP53 Regulates Transcription of DNA Repair Genes	1	86	0.00566423	0.669671	0.669671
R-HSA-416482	G alpha (12/13) signalling events	1	86	0.00566423	0.669671	0.669671
R-HSA-1655829	Regulation of cholesterol biosynthesis by SREBP (SREBF)	1	87	0.00573009	0.67391	0.67391
R-HSA-2151201	Transcriptional activation of mitochondrial biogenesis	1	88	0.00579596	0.678095	0.678095
R-HSA-72306	tRNA processing	2	184	0.0121188	0.685301	0.685301
R-HSA-5696399	Global Genome Nucleotide Excision Repair (GG-NER)	1	92	0.00605941	0.694309	0.694309
R-HSA-9013404	RAC2 GTPase cycle	1	92	0.00605941	0.694309	0.694309
R-HSA-72163	mRNA Splicing - Major Pathway	2	188	0.0123823	0.696613	0.696613
R-HSA-9006925	Intracellular signaling by second messengers	4	368	0.0242376	0.697743	0.697743
R-HSA-1169410	Antiviral mechanism by IFN-stimulated genes	1	94	0.00619113	0.702108	0.702108
R-HSA-909733	Interferon alpha/beta signaling	2	190	0.012514	0.702142	0.702142
R-HSA-382551	Transport of small molecules	11	971	0.0639531	0.708013	0.708013
R-HSA-2029480	Fcgamma receptor (FCGR) dependent phagocytosis	2	193	0.0127116	0.71028	0.71028
R-HSA-168256	Immune System	32	2698	0.177699	0.718012	0.718012
R-HSA-5620912	Anchoring of the basal body to the plasma membrane	1	99	0.00652045	0.720751	0.720751
R-HSA-388841	Costimulation by the CD28 family	1	99	0.00652045	0.720751	0.720751
R-HSA-5683057	MAPK family signaling cascades	4	380	0.025028	0.721295	0.721295
R-HSA-9013423	RAC3 GTPase cycle	1	100	0.00658631	0.724338	0.724338
R-HSA-8986944	Transcriptional Regulation by MECP2	1	100	0.00658631	0.724338	0.724338
R-HSA-72172	mRNA Splicing	2	199	0.0131068	0.726001	0.726001
R-HSA-2029481	FCGR activation	1	103	0.0067839	0.734826	0.734826
R-HSA-1474290	Collagen formation	1	104	0.00684977	0.738233	0.738233
R-HSA-168928	DDX58/IFIH1-mediated induction of interferon-alpha/beta	1	104	0.00684977	0.738233	0.738233
R-HSA-2168880	Scavenging of heme from plasma	1	106	0.00698149	0.744917	0.744917
R-HSA-6811434	COPI-dependent Golgi-to-ER retrograde traffic	1	107	0.00704736	0.748195	0.748195
R-HSA-170834	Signaling by TGF-beta Receptor Complex	1	107	0.00704736	0.748195	0.748195
R-HSA-71291	Metabolism of amino acids and derivatives	7	666	0.0438648	0.755499	0.755499
R-HSA-70171	Glycolysis	1	110	0.00724495	0.75778	0.75778
R-HSA-3371453	Regulation of HSF1-mediated heat shock response	1	113	0.00744253	0.767001	0.767001
R-HSA-1280215	Cytokine Signaling in Immune system	12	1107	0.0729105	0.767681	0.767681
R-HSA-1483257	Phospholipid metabolism	3	314	0.020681	0.769719	0.769719
R-HSA-8856825	Cargo recognition for clathrin-mediated endocytosis	1	115	0.00757426	0.772954	0.772954
R-HSA-948021	Transport to the Golgi and subsequent modification	2	219	0.014424	0.773293	0.773293
R-HSA-5696398	Nucleotide Excision Repair	1	119	0.00783771	0.78441	0.78441
R-HSA-425407	SLC-mediated transmembrane transport	4	420	0.0276625	0.79	0.79
R-HSA-1592230	Mitochondrial biogenesis	1	128	0.00843048	0.808125	0.808125
R-HSA-6811558	PI5P, PP2A and IER3 Regulate PI3K/AKT Signaling	1	129	0.00849634	0.810595	0.810595
R-HSA-4420097	VEGFA-VEGFR2 Pathway	1	129	0.00849634	0.810595	0.810595
R-HSA-1428517	The citric acid (TCA) cycle and respiratory electron transport	2	238	0.0156754	0.811493	0.811493
R-HSA-3371556	Cellular response to heat stress	1	135	0.00889152	0.82476	0.82476
R-HSA-9006936	Signaling by TGFB family members	1	136	0.00895739	0.827017	0.827017
R-HSA-199418	Negative regulation of the PI3K/AKT network	1	137	0.00902325	0.829244	0.829244
R-HSA-194138	Signaling by VEGF	1	140	0.00922084	0.835756	0.835756
R-HSA-70326	Glucose metabolism	1	140	0.00922084	0.835756	0.835756
R-HSA-877300	Interferon gamma signaling	2	252	0.0165975	0.835874	0.835874
R-HSA-114608	Platelet degranulation	1	141	0.0092867	0.837872	0.837872
R-HSA-202733	Cell surface interactions at the vascular wall	2	257	0.0169268	0.843871	0.843871
R-HSA-8856688	Golgi-to-ER retrograde transport	1	148	0.00974774	0.85194	0.85194
R-HSA-76005	Response to elevated platelet cytosolic Ca2+	1	148	0.00974774	0.85194	0.85194
R-HSA-1474228	Degradation of the extracellular matrix	1	148	0.00974774	0.85194	0.85194
R-HSA-2029482	Regulation of actin dynamics for phagocytic cup formation	1	158	0.0104064	0.869955	0.869955
R-HSA-9013148	CDC42 GTPase cycle	1	159	0.0104722	0.871632	0.871632
R-HSA-8856828	Clathrin-mediated endocytosis	1	161	0.010604	0.874922	0.874922
R-HSA-199977	ER to Golgi Anterograde Transport	1	164	0.0108016	0.879699	0.879699
R-HSA-425393	Transport of inorganic cations/anions and amino acids/oligopeptides	1	167	0.0109991	0.884296	0.884296
R-HSA-913531	Interferon Signaling	3	397	0.0261477	0.886658	0.886658
R-HSA-9609507	Protein localization	1	170	0.0111967	0.888717	0.888717
R-HSA-168249	Innate Immune System	13	1345	0.0885859	0.889364	0.889364
R-HSA-76002	Platelet activation, signaling and aggregation	2	293	0.0192979	0.891776	0.891776
R-HSA-2408522	Selenoamino acid metabolism	1	180	0.0118554	0.902276	0.902276
R-HSA-373076	Class A/1 (Rhodopsin-like receptors)	3	414	0.0272673	0.902791	0.902791
R-HSA-1630316	Glycosaminoglycan metabolism	1	181	0.0119212	0.903538	0.903538
R-HSA-418594	G alpha (i) signalling events	3	426	0.0280577	0.912907	0.912907
R-HSA-6791226	Major pathway of rRNA processing in the nucleolus and cytosol	1	189	0.0124481	0.913067	0.913067
R-HSA-9013149	RAC1 GTPase cycle	1	191	0.0125799	0.915299	0.915299
R-HSA-983231	Factors involved in megakaryocyte development and platelet production	1	194	0.0127774	0.918541	0.918541
R-HSA-1474244	Extracellular matrix organization	2	328	0.0216031	0.924981	0.924981
R-HSA-168898	Toll-like Receptor Cascades	1	202	0.0133044	0.926595	0.926595
R-HSA-8868773	rRNA processing in the nucleus and cytosol	1	208	0.0136995	0.932111	0.932111
R-HSA-1852241	Organelle biogenesis and maintenance	2	338	0.0222617	0.932547	0.932547
R-HSA-5617833	Cilium Assembly	1	210	0.0138313	0.933856	0.933856
R-HSA-71387	Metabolism of carbohydrates	3	456	0.0300336	0.934161	0.934161
R-HSA-162582	Signal Transduction	31	3023	0.199104	0.935549	0.935549
R-HSA-6811442	Intra-Golgi and retrograde Golgi-to-ER traffic	1	219	0.014424	0.941174	0.941174
R-HSA-397014	Muscle contraction	1	232	0.0152802	0.950345	0.950345
R-HSA-5653656	Vesicle-mediated transport	6	828	0.0545347	0.957593	0.957593
R-HSA-72312	rRNA processing	1	246	0.0162023	0.958635	0.958635
R-HSA-196849	Metabolism of water-soluble vitamins and cofactors	1	258	0.0169927	0.964636	0.964636
R-HSA-156580	Phase II - Conjugation of compounds	1	263	0.017322	0.966872	0.966872
R-HSA-109582	Hemostasis	5	803	0.0528881	0.978717	0.978717
R-HSA-422475	Axon guidance	3	585	0.0385299	0.981564	0.981564
R-HSA-9012999	RHO GTPase cycle	2	460	0.030297	0.982407	0.982407
R-HSA-500792	GPCR ligand binding	3	608	0.0400448	0.985455	0.985455
R-HSA-1266738	Developmental Biology	9	1279	0.084239	0.985924	0.985924
R-HSA-8957322	Metabolism of steroids	1	331	0.0218007	0.986406	0.986406
R-HSA-9675108	Nervous system development	3	621	0.040901	0.987294	0.987294
R-HSA-112315	Transmission across Chemical Synapses	1	344	0.0226569	0.98854	0.98854
R-HSA-199991	Membrane Trafficking	3	668	0.0439966	0.992258	0.992258
R-HSA-388396	GPCR downstream signalling	4	794	0.0522953	0.992261	0.992261
R-HSA-196854	Metabolism of vitamins and cofactors	1	382	0.0251597	0.993049	0.993049
R-HSA-8978868	Fatty acid metabolism	1	431	0.028387	0.996359	0.996359
R-HSA-372790	Signaling by GPCR	4	875	0.0576302	0.996597	0.996597
R-HSA-112316	Neuronal System	1	490	0.0322729	0.998333	0.998333
R-HSA-211859	Biological oxidations	1	551	0.0362906	0.99926	0.99926
R-HSA-556833	Metabolism of lipids	7	1446	0.0952381	0.999553	0.999553
R-HSA-1430728	Metabolism	28	3641	0.239808	0.999672	0.999672
R-HSA-9006934	Signaling by Receptor Tyrosine Kinases	1	621	0.040901	0.999709	0.999709
R-HSA-9752946	Expression and translocation of olfactory receptors	1	813	0.0535467	0.999978	0.999978
R-HSA-381753	Olfactory Signaling Pathway	1	887	0.0584206	0.999992	0.999992
R-HSA-9709957	Sensory Perception	1	1262	0.0831193	1	1

## Sheet: FourWeek_PosGenes_Pathways
Stable Identifier	Pathway Name	Entities Found	Entities Total	Entities Ratio	Entitis pValue	Entities FDR
R-HSA-6798695	Neutrophil degranulation	38	480	0.0316143	1.11022e-16	2.93099e-14
R-HSA-168256	Immune System	96	2698	0.177699	1.11022e-16	2.93099e-14
R-HSA-1280215	Cytokine Signaling in Immune system	48	1107	0.0729105	4.44089e-16	7.81597e-14
R-HSA-168249	Innate Immune System	50	1345	0.0885859	3.37508e-14	4.4551e-12
R-HSA-909733	Interferon alpha/beta signaling	20	190	0.012514	1.07581e-13	1.1296e-11
R-HSA-6783783	Interleukin-10 signaling	13	86	0.00566423	3.3483e-11	2.9465e-09
R-HSA-913531	Interferon Signaling	23	397	0.0261477	2.24841e-10	1.68631e-08
R-HSA-380108	Chemokine receptors bind chemokines	8	57	0.0037542	3.84571e-07	2.53817e-05
R-HSA-449147	Signaling by Interleukins	23	658	0.0433379	2.00155e-06	0.00011609
R-HSA-375276	Peptide ligand-binding receptors	11	203	0.0133702	2.52917e-05	0.00131517
R-HSA-6803157	Antimicrobial peptides	8	123	0.00810117	9.59701e-05	0.00460656
R-HSA-373076	Class A/1 (Rhodopsin-like receptors)	14	414	0.0272673	0.000313312	0.0137857
R-HSA-1592389	Activation of Matrix Metalloproteinases	4	35	0.00230521	0.000746565	0.0298626
R-HSA-1247673	Erythrocytes take up oxygen and release carbon dioxide	3	16	0.00105381	0.000868149	0.0321215
R-HSA-140534	Caspase activation via Death Receptors in the presence of ligand	3	20	0.00131726	0.00164011	0.0574037
R-HSA-1237044	Erythrocytes take up carbon dioxide and release oxygen	3	24	0.00158072	0.00274154	0.0840267
R-HSA-1480926	O2/CO2 exchange in erythrocytes	3	24	0.00158072	0.00274154	0.0840267
R-HSA-166016	Toll Like Receptor 4 (TLR4) Cascade	7	165	0.0108674	0.0030487	0.0840267
R-HSA-6785807	Interleukin-4 and Interleukin-13 signaling	8	211	0.0138971	0.0031121	0.0840267
R-HSA-418594	G alpha (i) signalling events	12	426	0.0280577	0.0037747	0.0913836
R-HSA-500792	GPCR ligand binding	15	608	0.0400448	0.00432455	0.0994645
R-HSA-1169410	Antiviral mechanism by IFN-stimulated genes	5	94	0.00619113	0.00470037	0.103408
R-HSA-2562578	TRIF-mediated programmed cell death	2	10	0.000658631	0.00598917	0.121645
R-HSA-5357769	Caspase activation via extrinsic apoptotic signalling pathway	3	32	0.00210762	0.00608223	0.121645
R-HSA-444473	Formyl peptide receptors bind formyl peptides and many other ligands	2	11	0.000724495	0.0071932	0.136671
R-HSA-1442490	Collagen degradation	4	69	0.00454456	0.00837566	0.150762
R-HSA-5686938	Regulation of TLR by endogenous ligand	3	36	0.00237107	0.00837904	0.150823
R-HSA-168898	Toll-like Receptor Cascades	7	202	0.0133044	0.00889093	0.151146
R-HSA-9616222	Transcriptional regulation of granulopoiesis	4	71	0.00467628	0.00922801	0.156876
R-HSA-937072	TRAF6-mediated induction of TAK1 complex within TLR4 complex	2	19	0.0012514	0.020226	0.222464
R-HSA-1169408	ISG15 antiviral mechanism	4	83	0.00546664	0.0155319	0.222464
R-HSA-936964	Activation of IRF3/IRF7 mediated by TBK1/IKK epsilon	2	20	0.00131726	0.0222464	0.222464
R-HSA-1475029	Reversible hydration of carbon dioxide	2	17	0.00111967	0.016433	0.222464
R-HSA-1461973	Defensins	3	51	0.00335902	0.021065	0.222464
R-HSA-5676594	TNF receptor superfamily (TNFSF) members mediating non-canonical NF-kB pathway	2	17	0.00111967	0.016433	0.222464
R-HSA-8941413	Events associated with phagocytolytic activity of PMN cells	2	19	0.0012514	0.020226	0.222464
R-HSA-9035034	RHOF GTPase cycle	3	46	0.0030297	0.0161022	0.222464
R-HSA-181438	Toll Like Receptor 2 (TLR2) Cascade	5	136	0.00895739	0.020449	0.222464
R-HSA-168188	Toll Like Receptor TLR6:TLR2 Cascade	5	133	0.0087598	0.0187866	0.222464
R-HSA-168179	Toll Like Receptor TLR1:TLR2 Cascade	5	136	0.00895739	0.020449	0.222464
R-HSA-166058	MyD88:MAL(TIRAP) cascade initiated on plasma membrane	5	133	0.0087598	0.0187866	0.222464
R-HSA-975163	IRAK2 mediated activation of TAK1 complex upon TLR7/8 or 9 stimulation	2	18	0.00118554	0.0182875	0.222464
R-HSA-983231	Factors involved in megakaryocyte development and platelet production	6	194	0.0127774	0.0245521	0.245521
R-HSA-1474228	Degradation of the extracellular matrix	5	148	0.00974774	0.0280503	0.280503
R-HSA-937041	IKK complex recruitment mediated by RIP1	2	24	0.00158072	0.0311056	0.286885
R-HSA-166020	Transfer of LPS from LBP carrier to CD14	1	3	0.000197589	0.0336086	0.302477
R-HSA-844615	The AIM2 inflammasome	1	4	0.000263453	0.04456	0.320615
R-HSA-9708296	tRNA-derived small RNA (tsRNA or tRNA-related fragment, tRF) biogenesis	1	4	0.000263453	0.04456	0.320615
R-HSA-140837	Intrinsic Pathway of Fibrin Clot Formation	2	26	0.00171244	0.035974	0.320615
R-HSA-8956321	Nucleotide salvage	3	69	0.00454456	0.0450704	0.320615
R-HSA-388396	GPCR downstream signalling	15	794	0.0522953	0.0386717	0.320615
R-HSA-372790	Signaling by GPCR	16	875	0.0576302	0.0426949	0.320615
R-HSA-109582	Hemostasis	15	803	0.0528881	0.041965	0.320615
R-HSA-975138	TRAF6 mediated induction of NFkB and MAP kinases upon TLR7/8 or 9 activation	4	116	0.00764012	0.0446352	0.320615
R-HSA-975155	MyD88 dependent cascade initiated on endosome	4	117	0.00770599	0.0458022	0.320615
R-HSA-168181	Toll Like Receptor 7/8 (TLR7/8) Cascade	4	118	0.00777185	0.0469862	0.328903
R-HSA-166166	MyD88-independent TLR4 cascade	4	121	0.00796944	0.0506396	0.354477
R-HSA-937061	TRIF(TICAM1)-mediated TLR4 signaling	4	121	0.00796944	0.0506396	0.354477
R-HSA-168138	Toll Like Receptor 9 (TLR9) Cascade	4	121	0.00796944	0.0506396	0.354477
R-HSA-5626978	TNFR1-mediated ceramide production	1	6	0.000395179	0.066094	0.394728
R-HSA-205025	NADE modulates death signalling	1	6	0.000395179	0.066094	0.394728
R-HSA-5218900	CASP8 activity is inhibited	1	12	0.000790358	0.127843	0.394728
R-HSA-170670	Adenylate cyclase inhibitory pathway	1	19	0.0012514	0.19477	0.394728
R-HSA-390522	Striated Muscle Contraction	2	40	0.00263453	0.0768935	0.394728
R-HSA-5357956	TNFR1-induced NFkappaB signaling pathway	1	30	0.00197589	0.289771	0.394728
R-HSA-171306	Packaging Of Telomere Ends	1	34	0.00223935	0.32148	0.394728
R-HSA-9615710	Late endosomal microautophagy	1	35	0.00230521	0.329185	0.394728
R-HSA-5334118	DNA methylation	1	36	0.00237107	0.336803	0.394728
R-HSA-5173214	O-glycosylation of TSR domain-containing proteins	1	41	0.00270039	0.373621	0.394728
R-HSA-212300	PRC2 methylates histones and DNA	1	44	0.00289798	0.394728	0.394728
R-HSA-8957275	Post-translational protein phosphorylation	2	109	0.00717908	0.352802	0.394728
R-HSA-9768919	NPAS4 regulates expression of target genes	1	41	0.00270039	0.373621	0.394728
R-HSA-991365	Activation of GABAB receptors	2	50	0.00329316	0.111804	0.394728
R-HSA-75158	TRAIL signaling	1	8	0.000526905	0.0871453	0.394728
R-HSA-977444	GABA B receptor activation	2	50	0.00329316	0.111804	0.394728
R-HSA-392170	ADP signalling through P2Y purinoceptor 12	1	26	0.00171244	0.256589	0.394728
R-HSA-9674555	Signaling by CSF3 (G-CSF)	1	35	0.00230521	0.329185	0.394728
R-HSA-2025928	Calcineurin activates NFAT	1	12	0.000790358	0.127843	0.394728
R-HSA-997272	Inhibition of voltage gated Ca2+ channels via Gbeta/gamma subunits	1	31	0.00204176	0.297834	0.394728
R-HSA-1296041	Activation of G protein gated Potassium channels	1	31	0.00204176	0.297834	0.394728
R-HSA-1296059	G protein gated Potassium channels	1	31	0.00204176	0.297834	0.394728
R-HSA-5668599	RHO GTPases Activate NADPH Oxidases	1	38	0.0025028	0.351781	0.394728
R-HSA-426486	Small interfering RNA (siRNA) biogenesis	1	9	0.000592768	0.0974934	0.394728
R-HSA-3772470	Negative regulation of TCF-dependent signaling by WNT ligand antagonists	1	15	0.000987947	0.157178	0.394728
R-HSA-977443	GABA receptor activation	2	68	0.00447869	0.182003	0.394728
R-HSA-4641262	Disassembly of the destruction complex and recruitment of AXIN to the membrane	1	33	0.00217348	0.313687	0.394728
R-HSA-9705462	Inactivation of CSF3 (G-CSF) signaling	1	27	0.0017783	0.265026	0.394728
R-HSA-5656169	Termination of translesion DNA synthesis	1	35	0.00230521	0.329185	0.394728
R-HSA-174577	Activation of C3 and C5	1	7	0.000461042	0.0766793	0.394728
R-HSA-5660668	CLEC7A/inflammasome pathway	1	8	0.000526905	0.0871453	0.394728
R-HSA-1462054	Alpha-defensins	1	11	0.000724495	0.117841	0.394728
R-HSA-3371378	Regulation by c-FLIP	1	11	0.000724495	0.117841	0.394728
R-HSA-9768778	Regulation of NPAS4 mRNA translation	1	11	0.000724495	0.117841	0.394728
R-HSA-202670	ERKs are inactivated	1	15	0.000987947	0.157178	0.394728
R-HSA-879415	Advanced glycosylation endproduct receptor signaling	1	16	0.00105381	0.166736	0.394728
R-HSA-4641263	Regulation of FZD by ubiquitination	1	22	0.00144899	0.221866	0.394728
R-HSA-400042	Adrenaline,noradrenaline inhibits insulin secretion	1	32	0.00210762	0.305806	0.394728
R-HSA-73728	RNA Polymerase I Promoter Opening	1	34	0.00223935	0.32148	0.394728
R-HSA-9696264	RND3 GTPase cycle	1	43	0.00283211	0.387772	0.394728
R-HSA-9696273	RND1 GTPase cycle	1	43	0.00283211	0.387772	0.394728
R-HSA-9696270	RND2 GTPase cycle	1	44	0.00289798	0.394728	0.394728
R-HSA-9613829	Chaperone Mediated Autophagy	1	23	0.00151485	0.230695	0.394728
R-HSA-1461957	Beta defensins	2	40	0.00263453	0.0768935	0.394728
R-HSA-166208	mTORC1-mediated signalling	1	28	0.00184417	0.273368	0.394728
R-HSA-203927	MicroRNA (miRNA) biogenesis	1	31	0.00204176	0.297834	0.394728
R-HSA-1566977	Fibronectin matrix formation	1	7	0.000461042	0.0766793	0.394728
R-HSA-69416	Dimerization of procaspase-8	1	11	0.000724495	0.117841	0.394728
R-HSA-1236973	Cross-presentation of particulate exogenous antigens (phagosomes)	1	13	0.000856221	0.137732	0.394728
R-HSA-5357786	TNFR1-induced proapoptotic signaling	1	14	0.000922084	0.14751	0.394728
R-HSA-2173791	TGF-beta receptor signaling in EMT (epithelial to mesenchymal transition)	1	19	0.0012514	0.19477	0.394728
R-HSA-5689901	Metalloprotease DUBs	1	32	0.00210762	0.305806	0.394728
R-HSA-73887	Death Receptor Signalling	3	164	0.0108016	0.287633	0.394728
R-HSA-5668541	TNFR2 non-canonical NF-kB pathway	3	104	0.00684977	0.116675	0.394728
R-HSA-9758881	Uptake of dietary cobalamins into enterocytes	1	15	0.000987947	0.157178	0.394728
R-HSA-6788467	IL-6-type cytokine receptor ligand interactions	1	17	0.00111967	0.176187	0.394728
R-HSA-1296065	Inwardly rectifying K+ channels	1	38	0.0025028	0.351781	0.394728
R-HSA-9031628	NGF-stimulated transcription	2	56	0.00368834	0.134367	0.394728
R-HSA-8939236	RUNX1 regulates transcription of genes involved in differentiation of HSCs	2	106	0.00698149	0.340451	0.394728
R-HSA-933542	TRAF6 mediated NF-kB activation	1	30	0.00197589	0.289771	0.394728
R-HSA-198725	Nuclear Events (kinase and transcription factor activation)	3	80	0.00526905	0.0642905	0.394728
R-HSA-9018519	Estrogen-dependent gene expression	3	154	0.0101429	0.256952	0.394728
R-HSA-173736	Alternative complement activation	1	6	0.000395179	0.066094	0.394728
R-HSA-6799990	Metal sequestration by antimicrobial proteins	1	13	0.000856221	0.137732	0.394728
R-HSA-73614	Pyrimidine salvage	2	34	0.00223935	0.0580267	0.394728
R-HSA-196843	Vitamin B2 (riboflavin) metabolism	1	17	0.00111967	0.176187	0.394728
R-HSA-139853	Elevation of cytosolic Ca2+ levels	1	22	0.00144899	0.221866	0.394728
R-HSA-444209	Free fatty acid receptors	1	29	0.00191003	0.281616	0.394728
R-HSA-110330	Recognition and association of DNA glycosylase with site containing an affected purine	1	39	0.00256866	0.359144	0.394728
R-HSA-68616	Assembly of the ORC complex at the origin of replication	1	40	0.00263453	0.366423	0.394728
R-HSA-114608	Platelet degranulation	3	141	0.0092867	0.21787	0.394728
R-HSA-622312	Inflammasomes	1	34	0.00223935	0.32148	0.394728
R-HSA-5578768	Physiological factors	1	18	0.00118554	0.185531	0.394728
R-HSA-388844	Receptor-type tyrosine-protein phosphatases	1	20	0.00131726	0.203905	0.394728
R-HSA-844456	The NLRP3 inflammasome	1	24	0.00158072	0.239425	0.394728
R-HSA-5694530	Cargo concentration in the ER	1	37	0.00243694	0.344334	0.394728
R-HSA-8939211	ESR-mediated signaling	5	257	0.0169268	0.171334	0.394728
R-HSA-392518	Signal amplification	1	41	0.00270039	0.373621	0.394728
R-HSA-936440	Negative regulators of DDX58/IFIH1 signaling	2	37	0.00243694	0.0672372	0.394728
R-HSA-140877	Formation of Fibrin Clot (Clotting Cascade)	2	43	0.00283211	0.0869558	0.394728
R-HSA-380994	ATF4 activates genes in response to endoplasmic reticulum stress	2	34	0.00223935	0.0580267	0.394728
R-HSA-198753	ERK/MAPK targets	1	26	0.00171244	0.256589	0.394728
R-HSA-977606	Regulation of Complement cascade	4	139	0.00915498	0.0757113	0.394728
R-HSA-76005	Response to elevated platelet cytosolic Ca2+	3	148	0.00974774	0.238772	0.394728
R-HSA-166658	Complement cascade	4	156	0.0102746	0.104121	0.394728
R-HSA-140875	Common Pathway of Fibrin Clot Formation	1	25	0.00164658	0.248056	0.394728
R-HSA-1222556	ROS and RNS production in phagocytes	3	82	0.00540078	0.0681322	0.394728
R-HSA-397014	Muscle contraction	4	232	0.0152802	0.272881	0.394728
R-HSA-419812	Calcitonin-like ligand receptors	1	11	0.000724495	0.117841	0.394728
R-HSA-418360	Platelet calcium homeostasis	1	35	0.00230521	0.329185	0.394728
R-HSA-983169	Class I MHC mediated antigen processing & presentation	7	479	0.0315484	0.305974	0.394728
R-HSA-9707616	Heme signaling	2	70	0.00461042	0.190177	0.394728
R-HSA-5213460	RIPK1-mediated regulated necrosis	1	42	0.00276625	0.380737	0.394728
R-HSA-449836	Other interleukin signaling	1	24	0.00158072	0.239425	0.394728
R-HSA-6783589	Interleukin-6 family signaling	1	30	0.00197589	0.289771	0.394728
R-HSA-5675482	Regulation of necroptotic cell death	1	36	0.00237107	0.336803	0.394728
R-HSA-1474244	Extracellular matrix organization	6	328	0.0216031	0.17327	0.394728
R-HSA-9758890	Transport of RCbl within the body	1	14	0.000922084	0.14751	0.394728
R-HSA-9013405	RHOD GTPase cycle	2	57	0.0037542	0.138222	0.394728
R-HSA-901032	ER Quality Control Compartment (ERQC)	1	33	0.00217348	0.313687	0.394728
R-HSA-877300	Interferon gamma signaling	4	252	0.0165975	0.32373	0.394728
R-HSA-187037	Signaling by NTRK1 (TRKA)	3	143	0.00941843	0.223804	0.394728
R-HSA-1280218	Adaptive Immune System	15	1012	0.0666535	0.180149	0.394728
R-HSA-9009391	Extra-nuclear estrogen signaling	2	111	0.00731081	0.360992	0.394728
R-HSA-9006931	Signaling by Nuclear Receptors	6	387	0.025489	0.280403	0.394728
R-HSA-446353	Cell-extracellular matrix interactions	1	19	0.0012514	0.19477	0.394728
R-HSA-2022377	Metabolism of Angiotensinogen to Angiotensins	1	27	0.0017783	0.265026	0.394728
R-HSA-1236974	ER-Phagosome pathway	3	173	0.0113943	0.315486	0.394728
R-HSA-381042	PERK regulates gene expression	2	42	0.00276625	0.083559	0.394728
R-HSA-9768759	Regulation of NPAS4 gene expression	1	22	0.00144899	0.221866	0.394728
R-HSA-5365859	RA biosynthesis pathway	1	41	0.00270039	0.373621	0.394728
R-HSA-1236975	Antigen processing-Cross presentation	4	195	0.0128433	0.183966	0.394728
R-HSA-112409	RAF-independent MAPK1/3 activation	1	28	0.00184417	0.273368	0.394728
R-HSA-5218859	Regulated Necrosis	2	73	0.00480801	0.202528	0.394728
R-HSA-417957	P2Y receptors	1	18	0.00118554	0.185531	0.394728
R-HSA-901042	Calnexin/calreticulin cycle	1	41	0.00270039	0.373621	0.394728
R-HSA-168928	DDX58/IFIH1-mediated induction of interferon-alpha/beta	3	104	0.00684977	0.116675	0.394728
R-HSA-166520	Signaling by NTRKs	3	166	0.0109333	0.29381	0.394728
R-HSA-8983711	OAS antiviral response	1	15	0.000987947	0.157178	0.394728
R-HSA-418038	Nucleotide-like (purinergic) receptors	1	23	0.00151485	0.230695	0.394728
R-HSA-8866652	Synthesis of active ubiquitin: roles of E1 and E2 enzymes	1	33	0.00217348	0.313687	0.394728
R-HSA-450282	MAPK targets/ Nuclear events mediated by MAP kinases	1	35	0.00230521	0.329185	0.394728
R-HSA-1660662	Glycosphingolipid metabolism	2	86	0.00566423	0.25683	0.394728
R-HSA-2172127	DAP12 interactions	2	53	0.00349075	0.122958	0.394728
R-HSA-110328	Recognition and association of DNA glycosylase with site containing an affected pyrimidine	1	42	0.00276625	0.380737	0.394728
R-HSA-5357801	Programmed Cell Death	4	234	0.015412	0.27791	0.394728
R-HSA-5620971	Pyroptosis	1	34	0.00223935	0.32148	0.394728
R-HSA-2173796	SMAD2/SMAD3:SMAD4 heterotrimer regulates transcription	1	44	0.00289798	0.394728	0.394728
R-HSA-170834	Signaling by TGF-beta Receptor Complex	2	107	0.00704736	0.344577	0.394728
R-HSA-9619665	EGR2 and SOX10-mediated initiation of Schwann cell myelination	1	39	0.00256866	0.359144	0.394728
R-HSA-109581	Apoptosis	3	192	0.0126457	0.374307	0.394728
R-HSA-975871	MyD88 cascade initiated on plasma membrane	2	109	0.00717908	0.352802	0.394728
R-HSA-168142	Toll Like Receptor 10 (TLR10) Cascade	2	109	0.00717908	0.352802	0.394728
R-HSA-168176	Toll Like Receptor 5 (TLR5) Cascade	2	109	0.00717908	0.352802	0.394728
R-HSA-8950505	Gene and protein expression by JAK-STAT signaling after Interleukin-12 stimulation	2	73	0.00480801	0.202528	0.394728
R-HSA-168164	Toll Like Receptor 3 (TLR3) Cascade	2	116	0.00764012	0.381294	0.394728
R-HSA-9020591	Interleukin-12 signaling	2	84	0.0055325	0.248428	0.394728
R-HSA-447115	Interleukin-12 family signaling	2	96	0.00632286	0.298828	0.394728
R-HSA-211000	Gene Silencing by RNA	2	120	0.00790358	0.39734	0.39734
R-HSA-427359	SIRT1 negatively regulates rRNA expression	1	45	0.00296384	0.401606	0.401606
R-HSA-110331	Cleavage of the damaged purine	1	45	0.00296384	0.401606	0.401606
R-HSA-74217	Purine salvage	1	45	0.00296384	0.401606	0.401606
R-HSA-5357905	Regulation of TNFR1 signaling	1	46	0.0030297	0.408406	0.408406
R-HSA-73927	Depurination	1	46	0.0030297	0.408406	0.408406
R-HSA-189451	Heme biosynthesis	1	46	0.0030297	0.408406	0.408406
R-HSA-162582	Signal Transduction	36	3023	0.199104	0.413286	0.413286
R-HSA-9020702	Interleukin-1 signaling	2	125	0.00823289	0.417125	0.417125
R-HSA-9670095	Inhibition of DNA recombination at telomere	1	48	0.00316143	0.421776	0.421776
R-HSA-427389	ERCC6 (CSB) and EHMT2 (G9a) positively regulate rRNA expression	1	48	0.00316143	0.421776	0.421776
R-HSA-110313	Translesion synthesis by Y family DNA polymerases bypasses lesions on DNA template	1	48	0.00316143	0.421776	0.421776
R-HSA-381426	Regulation of Insulin-like Growth Factor (IGF) transport and uptake by Insulin-like Growth Factor Binding Proteins (IGFBPs)	2	127	0.00836462	0.424948	0.424948
R-HSA-9012999	RHO GTPase cycle	6	460	0.030297	0.426955	0.426955
R-HSA-5625886	Activated PKN1 stimulates transcription of AR (androgen receptor) regulated genes KLK2 and KLK3	1	49	0.00322729	0.428348	0.428348
R-HSA-5675221	Negative regulation of MAPK pathway	1	49	0.00322729	0.428348	0.428348
R-HSA-76002	Platelet activation, signaling and aggregation	4	293	0.0192979	0.428883	0.428883
R-HSA-165159	MTOR signalling	1	50	0.00329316	0.434846	0.434846
R-HSA-2173789	TGF-beta receptor signaling activates SMADs	1	50	0.00329316	0.434846	0.434846
R-HSA-73621	Pyrimidine catabolism	1	51	0.00335902	0.44127	0.44127
R-HSA-110329	Cleavage of the damaged pyrimidine	1	51	0.00335902	0.44127	0.44127
R-HSA-73928	Depyrimidination	1	51	0.00335902	0.44127	0.44127
R-HSA-1433557	Signaling by SCF-KIT	1	51	0.00335902	0.44127	0.44127
R-HSA-196741	Cobalamin (Cbl, vitamin B12) transport and metabolism	1	52	0.00342488	0.447621	0.447621
R-HSA-5683826	Surfactant metabolism	1	52	0.00342488	0.447621	0.447621
R-HSA-9006936	Signaling by TGFB family members	2	136	0.00895739	0.459459	0.459459
R-HSA-606279	Deposition of new CENPA-containing nucleosomes at the centromere	1	54	0.00355661	0.46011	0.46011
R-HSA-774815	Nucleosome assembly	1	54	0.00355661	0.46011	0.46011
R-HSA-2299718	Condensation of Prophase Chromosomes	1	55	0.00362247	0.466249	0.466249
R-HSA-6811440	Retrograde transport at the Trans-Golgi-Network	1	55	0.00362247	0.466249	0.466249
R-HSA-3214858	RMTs methylate histone arginines	1	55	0.00362247	0.466249	0.466249
R-HSA-3928665	EPH-ephrin mediated repulsion of cells	1	55	0.00362247	0.466249	0.466249
R-HSA-445989	TAK1-dependent IKK and NF-kappa-B activation	1	55	0.00362247	0.466249	0.466249
R-HSA-6809371	Formation of the cornified envelope	2	138	0.00908911	0.466966	0.466966
R-HSA-75893	TNF signaling	1	56	0.00368834	0.472318	0.472318
R-HSA-9634597	GPER1 signaling	1	56	0.00368834	0.472318	0.472318
R-HSA-73893	DNA Damage Bypass	1	57	0.0037542	0.478319	0.478319
R-HSA-532668	N-glycan trimming in the ER and Calnexin/Calreticulin cycle	1	57	0.0037542	0.478319	0.478319
R-HSA-2453902	The canonical retinoid cycle in rods (twilight vision)	1	57	0.0037542	0.478319	0.478319
R-HSA-912446	Meiotic recombination	1	58	0.00382006	0.484252	0.484252
R-HSA-202433	Generation of second messenger molecules	1	59	0.00388593	0.490117	0.490117
R-HSA-112382	Formation of RNA Pol II elongation complex	1	60	0.00395179	0.495917	0.495917
R-HSA-9634815	Transcriptional Regulation by NPAS4	1	60	0.00395179	0.495917	0.495917
R-HSA-4085001	Sialic acid metabolism	1	60	0.00395179	0.495917	0.495917
R-HSA-75955	RNA Polymerase II Transcription Elongation	1	61	0.00401765	0.501651	0.501651
R-HSA-73772	RNA Polymerase I Promoter Escape	1	61	0.00401765	0.501651	0.501651
R-HSA-8866654	E3 ubiquitin ligases ubiquitinate target proteins	1	61	0.00401765	0.501651	0.501651
R-HSA-445355	Smooth Muscle Contraction	1	61	0.00401765	0.501651	0.501651
R-HSA-2132295	MHC class II antigen presentation	2	149	0.00981361	0.507126	0.507126
R-HSA-5250924	B-WICH complex positively regulates rRNA expression	1	62	0.00408351	0.507319	0.507319
R-HSA-1221632	Meiotic synapsis	1	62	0.00408351	0.507319	0.507319
R-HSA-3214815	HDACs deacetylate histones	1	63	0.00414938	0.512924	0.512924
R-HSA-6811436	COPI-independent Golgi-to-ER retrograde traffic	1	63	0.00414938	0.512924	0.512924
R-HSA-73929	Base-Excision Repair, AP Site Formation	1	63	0.00414938	0.512924	0.512924
R-HSA-418597	G alpha (z) signalling events	1	63	0.00414938	0.512924	0.512924
R-HSA-2173793	Transcriptional activity of SMAD2/SMAD3:SMAD4 heterotrimer	1	64	0.00421524	0.518466	0.518466
R-HSA-381119	Unfolded Protein Response (UPR)	2	155	0.0102088	0.528194	0.528194
R-HSA-201722	Formation of the beta-catenin:TCF transactivating complex	1	67	0.00441283	0.534717	0.534717
R-HSA-2022090	Assembly of collagen fibrils and other multimeric structures	1	67	0.00441283	0.534717	0.534717
R-HSA-428157	Sphingolipid metabolism	2	158	0.0104064	0.538499	0.538499
R-HSA-3299685	Detoxification of Reactive Oxygen Species	1	68	0.00447869	0.540012	0.540012
R-HSA-450294	MAP kinase activation	1	69	0.00454456	0.545247	0.545247
R-HSA-5658442	Regulation of RAS by GAPs	1	71	0.00467628	0.55554	0.55554
R-HSA-2559586	DNA Damage/Telomere Stress Induced Senescence	1	71	0.00467628	0.55554	0.55554
R-HSA-199977	ER to Golgi Anterograde Transport	2	164	0.0108016	0.558642	0.558642
R-HSA-15869	Metabolism of nucleotides	3	256	0.016861	0.559743	0.559743
R-HSA-5690714	CD22 mediated BCR regulation	1	72	0.00474215	0.560599	0.560599
R-HSA-168643	Nucleotide-binding domain, leucine rich repeat containing receptor (NLR) signaling pathways	1	72	0.00474215	0.560599	0.560599
R-HSA-202733	Cell surface interactions at the vascular wall	3	257	0.0169268	0.562383	0.562383
R-HSA-112040	G-protein mediated events	1	73	0.00480801	0.565601	0.565601
R-HSA-5362517	Signaling by Retinoic Acid	1	73	0.00480801	0.565601	0.565601
R-HSA-9662360	Sensory processing of sound by inner hair cells of the cochlea	1	76	0.0050056	0.58027	0.58027
R-HSA-3371497	HSP90 chaperone cycle for steroid hormone receptors (SHR) in the presence of ligand	1	76	0.0050056	0.58027	0.58027
R-HSA-189445	Metabolism of porphyrins	1	76	0.0050056	0.58027	0.58027
R-HSA-204005	COPII-mediated vesicle transport	1	77	0.00507146	0.585049	0.585049
R-HSA-8936459	RUNX1 regulates genes involved in megakaryocyte differentiation and platelet function	1	78	0.00513732	0.589774	0.589774
R-HSA-448424	Interleukin-17 signaling	1	78	0.00513732	0.589774	0.589774
R-HSA-427413	NoRC negatively regulates rRNA expression	1	80	0.00526905	0.599065	0.599065
R-HSA-5250913	Positive epigenetic regulation of rRNA expression	1	80	0.00526905	0.599065	0.599065
R-HSA-5625740	RHO GTPases activate PKNs	1	80	0.00526905	0.599065	0.599065
R-HSA-5578749	Transcriptional regulation by small RNAs	1	81	0.00533491	0.603631	0.603631
R-HSA-204998	Cell death signalling via NRAGE, NRIF and NADE	1	81	0.00533491	0.603631	0.603631
R-HSA-674695	RNA Polymerase II Pre-transcription Events	1	82	0.00540078	0.608146	0.608146
R-HSA-917937	Iron uptake and transport	1	83	0.00546664	0.61261	0.61261
R-HSA-8852135	Protein ubiquitination	1	84	0.0055325	0.617023	0.617023
R-HSA-446652	Interleukin-1 family signaling	2	183	0.012053	0.618259	0.618259
R-HSA-73854	RNA Polymerase I Promoter Clearance	1	85	0.00559837	0.621386	0.621386
R-HSA-6796648	TP53 Regulates Transcription of DNA Repair Genes	1	86	0.00566423	0.6257	0.6257
R-HSA-416476	G alpha (q) signalling events	3	284	0.0187051	0.629959	0.629959
R-HSA-73864	RNA Polymerase I Transcription	1	87	0.00573009	0.629965	0.629965
R-HSA-9659379	Sensory processing of sound	1	87	0.00573009	0.629965	0.629965
R-HSA-983705	Signaling by the B Cell Receptor (BCR)	2	189	0.0124481	0.635763	0.635763
R-HSA-418555	G alpha (s) signalling events	2	189	0.0124481	0.635763	0.635763
R-HSA-5250941	Negative epigenetic regulation of rRNA expression	1	89	0.00586182	0.63835	0.63835
R-HSA-1912408	Pre-NOTCH Transcription and Translation	1	89	0.00586182	0.63835	0.63835
R-HSA-977225	Amyloid fiber formation	1	89	0.00586182	0.63835	0.63835
R-HSA-9707564	Cytoprotection by HMOX1	1	91	0.00599355	0.646546	0.646546
R-HSA-1168372	Downstream signaling events of B Cell Receptor (BCR)	1	91	0.00599355	0.646546	0.646546
R-HSA-2559582	Senescence-Associated Secretory Phenotype (SASP)	1	91	0.00599355	0.646546	0.646546
R-HSA-1500620	Meiosis	1	92	0.00605941	0.650575	0.650575
R-HSA-9013404	RAC2 GTPase cycle	1	92	0.00605941	0.650575	0.650575
R-HSA-6794362	Protein-protein interactions at synapses	1	93	0.00612527	0.654558	0.654558
R-HSA-6807505	RNA polymerase II transcribes snRNA genes	1	94	0.00619113	0.658496	0.658496
R-HSA-446728	Cell junction organization	1	95	0.006257	0.662389	0.662389
R-HSA-5689603	UCH proteinases	1	98	0.00645459	0.673806	0.673806
R-HSA-373080	Class B/2 (Secretin family receptors)	1	99	0.00652045	0.677526	0.677526
R-HSA-9013423	RAC3 GTPase cycle	1	100	0.00658631	0.681203	0.681203
R-HSA-73884	Base Excision Repair	1	100	0.00658631	0.681203	0.681203
R-HSA-2682334	EPH-Ephrin signaling	1	102	0.00671804	0.688433	0.688433
R-HSA-983695	Antigen activates B Cell Receptor (BCR) leading to generation of second messengers	1	103	0.0067839	0.691987	0.691987
R-HSA-1474290	Collagen formation	1	104	0.00684977	0.695501	0.695501
R-HSA-983168	Antigen processing: Ubiquitination & Proteasome degradation	3	315	0.0207469	0.698301	0.698301
R-HSA-198933	Immunoregulatory interactions between a Lymphoid and a non-Lymphoid cell	3	316	0.0208128	0.700338	0.700338
R-HSA-194315	Signaling by Rho GTPases	7	709	0.046697	0.702089	0.702089
R-HSA-2168880	Scavenging of heme from plasma	1	106	0.00698149	0.702409	0.702409
R-HSA-6807878	COPI-mediated anterograde transport	1	107	0.00704736	0.705804	0.705804
R-HSA-1296071	Potassium Channels	1	107	0.00704736	0.705804	0.705804
R-HSA-201681	TCF dependent signaling in response to WNT	2	216	0.0142264	0.706838	0.706838
R-HSA-446203	Asparagine N-linked glycosylation	4	421	0.0277284	0.709152	0.709152
R-HSA-422356	Regulation of insulin secretion	1	108	0.00711322	0.709161	0.709161
R-HSA-157579	Telomere Maintenance	1	109	0.00717908	0.712479	0.712479
R-HSA-381340	Transcriptional regulation of white adipocyte differentiation	1	109	0.00717908	0.712479	0.712479
R-HSA-948021	Transport to the Golgi and subsequent modification	2	219	0.014424	0.713982	0.713982
R-HSA-6811442	Intra-Golgi and retrograde Golgi-to-ER traffic	2	219	0.014424	0.713982	0.713982
R-HSA-3214847	HATs acetylate histones	1	110	0.00724495	0.71576	0.71576
R-HSA-193704	p75 NTR receptor-mediated signalling	1	110	0.00724495	0.71576	0.71576
R-HSA-9716542	Signaling by Rho GTPases, Miro GTPases and RHOBTB3	7	725	0.0477508	0.723756	0.723756
R-HSA-111885	Opioid Signalling	1	113	0.00744253	0.725382	0.725382
R-HSA-2559580	Oxidative Stress Induced Senescence	1	114	0.0075084	0.728516	0.728516
R-HSA-68867	Assembly of the pre-replicative complex	1	114	0.0075084	0.728516	0.728516
R-HSA-1912422	Pre-NOTCH Expression and Processing	1	114	0.0075084	0.728516	0.728516
R-HSA-6805567	Keratinization	2	226	0.0148851	0.730086	0.730086
R-HSA-163125	Post-translational modification: synthesis of GPI-anchored proteins	1	115	0.00757426	0.731616	0.731616
R-HSA-5617472	Activation of anterior HOX genes in hindbrain development during early embryogenesis	1	116	0.00764012	0.734679	0.734679
R-HSA-5619507	Activation of HOX genes during differentiation	1	116	0.00764012	0.734679	0.734679
R-HSA-418346	Platelet homeostasis	1	118	0.00777185	0.740703	0.740703
R-HSA-611105	Respiratory electron transport	1	118	0.00777185	0.740703	0.740703
R-HSA-112314	Neurotransmitter receptors and postsynaptic signal transmission	2	232	0.0152802	0.743276	0.743276
R-HSA-166663	Initial triggering of complement	1	120	0.00790358	0.746591	0.746591
R-HSA-5607764	CLEC7A (Dectin-1) signaling	1	120	0.00790358	0.746591	0.746591
R-HSA-1474165	Reproduction	1	123	0.00810117	0.755174	0.755174
R-HSA-4420097	VEGFA-VEGFR2 Pathway	1	129	0.00849634	0.771484	0.771484
R-HSA-2980736	Peptide hormone metabolism	1	130	0.00856221	0.774095	0.774095
R-HSA-446219	Synthesis of substrates in N-glycan biosythesis	1	131	0.00862807	0.776676	0.776676
R-HSA-69002	DNA Replication Pre-Initiation	1	132	0.00869393	0.779228	0.779228
R-HSA-5173105	O-linked glycosylation	1	133	0.0087598	0.781752	0.781752
R-HSA-1500931	Cell-Cell communication	1	134	0.00882566	0.784246	0.784246
R-HSA-68875	Mitotic Prophase	1	135	0.00889152	0.786712	0.786712
R-HSA-73886	Chromosome Maintenance	1	136	0.00895739	0.78915	0.78915
R-HSA-196849	Metabolism of water-soluble vitamins and cofactors	2	258	0.0169927	0.794245	0.794245
R-HSA-212165	Epigenetic regulation of gene expression	1	139	0.00915498	0.7963	0.7963
R-HSA-194138	Signaling by VEGF	1	140	0.00922084	0.798629	0.798629
R-HSA-8878171	Transcriptional regulation by RUNX1	2	261	0.0171903	0.799516	0.799516
R-HSA-8956319	Nucleotide catabolism	1	144	0.00948429	0.807684	0.807684
R-HSA-9711123	Cellular response to chemical stress	2	269	0.0177172	0.812993	0.812993
R-HSA-163685	Integration of energy metabolism	1	147	0.00968188	0.814208	0.814208
R-HSA-5576891	Cardiac conduction	1	147	0.00968188	0.814208	0.814208
R-HSA-202403	TCR signaling	1	147	0.00968188	0.814208	0.814208
R-HSA-8856688	Golgi-to-ER retrograde transport	1	148	0.00974774	0.816333	0.816333
R-HSA-163200	Respiratory electron transport, ATP synthesis by chemiosmotic coupling, and heat production by uncoupling proteins.	1	153	0.0100771	0.826604	0.826604
R-HSA-446193	Biosynthesis of the N-glycan precursor (dolichol lipid-linked oligosaccharide, LLO) and transfer to a nascent protein	1	159	0.0104722	0.838177	0.838177
R-HSA-9006934	Signaling by Receptor Tyrosine Kinases	5	621	0.040901	0.839452	0.839452
R-HSA-9612973	Autophagy	1	166	0.0109333	0.850711	0.850711
R-HSA-2173782	Binding and Uptake of Ligands by Scavenger Receptors	1	168	0.011065	0.854112	0.854112
R-HSA-69306	DNA Replication	1	169	0.0111309	0.855783	0.855783
R-HSA-2187338	Visual phototransduction	1	169	0.0111309	0.855783	0.855783
R-HSA-5673001	RAF/MAP kinase cascade	2	322	0.0212079	0.883587	0.883587
R-HSA-195258	RHO GTPase Effectors	2	326	0.0214714	0.887771	0.887771
R-HSA-9013149	RAC1 GTPase cycle	1	191	0.0125799	0.888097	0.888097
R-HSA-5684996	MAPK1/MAPK3 signaling	2	329	0.021669	0.890817	0.890817
R-HSA-195721	Signaling by WNT	2	332	0.0218666	0.893787	0.893787
R-HSA-2559583	Cellular Senescence	1	200	0.0131726	0.899138	0.899138
R-HSA-5621481	C-type lectin receptors (CLRs)	1	203	0.0133702	0.902573	0.902573
R-HSA-112315	Transmission across Chemical Synapses	2	344	0.0226569	0.904935	0.904935
R-HSA-5689880	Ub-specific processing proteases	1	206	0.0135678	0.905891	0.905891
R-HSA-112316	Neuronal System	3	490	0.0322729	0.920033	0.920033
R-HSA-1266738	Developmental Biology	10	1279	0.084239	0.9242	0.9242
R-HSA-5683057	MAPK family signaling cascades	2	380	0.025028	0.932186	0.932186
R-HSA-376176	Signaling by ROBO receptors	1	235	0.0154778	0.932701	0.932701
R-HSA-73894	DNA Repair	2	381	0.0250939	0.932826	0.932826
R-HSA-196854	Metabolism of vitamins and cofactors	2	382	0.0251597	0.933461	0.933461
R-HSA-1428517	The citric acid (TCA) cycle and respiratory electron transport	1	238	0.0156754	0.934997	0.934997
R-HSA-2262752	Cellular responses to stress	7	1005	0.0661925	0.94415	0.94415
R-HSA-3247509	Chromatin modifying enzymes	1	258	0.0169927	0.948439	0.948439
R-HSA-4839726	Chromatin organization	1	258	0.0169927	0.948439	0.948439
R-HSA-157118	Signaling by NOTCH	1	259	0.0170586	0.949034	0.949034
R-HSA-8953897	Cellular responses to stimuli	7	1023	0.067378	0.950384	0.950384
R-HSA-5688426	Deubiquitination	1	289	0.0190344	0.964017	0.964017
R-HSA-9675108	Nervous system development	3	621	0.040901	0.974189	0.974189
R-HSA-199991	Membrane Trafficking	3	668	0.0439966	0.983148	0.983148
R-HSA-5653656	Vesicle-mediated transport	4	828	0.0545347	0.986341	0.986341
R-HSA-422475	Axon guidance	2	585	0.0385299	0.991142	0.991142
R-HSA-68886	M Phase	1	416	0.0273991	0.991821	0.991821
R-HSA-597592	Post-translational protein modification	9	1604	0.105644	0.99579	0.99579
R-HSA-382551	Transport of small molecules	4	971	0.0639531	0.996181	0.996181
R-HSA-3700989	Transcriptional Regulation by TP53	1	484	0.0318778	0.996319	0.996319
R-HSA-69278	Cell Cycle, Mitotic	1	596	0.0392544	0.99902	0.99902
R-HSA-1640170	Cell Cycle	1	734	0.0483435	0.999811	0.999811
R-HSA-392499	Metabolism of proteins	10	2214	0.145821	0.999921	0.999921
R-HSA-212436	Generic Transcription Pathway	4	1588	0.104591	0.999992	0.999992
R-HSA-9709957	Sensory Perception	2	1262	0.0831193	0.999995	0.999995
R-HSA-74160	Gene expression (Transcription)	5	1893	0.124679	0.999998	0.999998
R-HSA-73857	RNA Polymerase II Transcription	4	1730	0.113943	0.999998	0.999998
R-HSA-556833	Metabolism of lipids	2	1446	0.0952381	0.999999	0.999999
R-HSA-1430728	Metabolism	12	3641	0.239808	1	1
