# Supplementary material for: VIGET: A web portal for study of vaccine-induced host responses based on Reactome pathways and ImmPort data
Source: Front Immunol. 2023 Mar 21;14:1141030. doi: 10.3389/fimmu.2023.1141030 (PMC10172660; doi:10.3389/fimmu.2023.1141030)
Supplement: Supplementary Table 10 — Reactome pathway enrichment analysis results for genes having Log2FC < -0.2 reported in Table S4 . [file Table_10.xlsx]

## Sheet: OneWeek_NegGenes_Pathways
Stable Identifier	Pathway Name	Entities Found	Entities Total	Entities Ratio	Entitis pValue	Entities FDR
R-HSA-428359	Insulin-like Growth Factor-2 mRNA Binding Proteins (IGF2BPs/IMPs/VICKZs) bind RNA	5	13	0.000856221	2.37801e-06	0.00163178
R-HSA-380108	Chemokine receptors bind chemokines	8	57	0.0037542	4.1627e-06	0.00163178
R-HSA-6785807	Interleukin-4 and Interleukin-13 signaling	14	211	0.0138971	7.99126e-06	0.00208572
R-HSA-6783783	Interleukin-10 signaling	9	86	0.00566423	1.08669e-05	0.00212992
R-HSA-72695	Formation of the ternary complex, and subsequently, the 43S complex	7	54	0.00355661	2.76284e-05	0.00309438
R-HSA-72706	GTP hydrolysis and joining of the 60S ribosomal subunit	10	120	0.00790358	2.46767e-05	0.00309438
R-HSA-156827	L13a-mediated translational silencing of Ceruloplasmin expression	10	120	0.00790358	2.46767e-05	0.00309438
R-HSA-72737	Cap-dependent Translation Initiation	10	130	0.00856221	4.79892e-05	0.00417506
R-HSA-72613	Eukaryotic Translation Initiation	10	130	0.00856221	4.79892e-05	0.00417506
R-HSA-72689	Formation of a pool of free 40S subunits	9	106	0.00698149	5.45166e-05	0.00425229
R-HSA-72649	Translation initiation complex formation	7	62	0.00408351	6.53947e-05	0.00464302
R-HSA-72702	Ribosomal scanning and start codon recognition	7	64	0.00421524	7.95466e-05	0.00498698
R-HSA-6798695	Neutrophil degranulation	20	480	0.0316143	8.31163e-05	0.00498698
R-HSA-72662	Activation of the mRNA upon binding of the cap-binding complex and eIFs, and subsequent binding to 43S	7	66	0.00434697	9.61026e-05	0.00538174
R-HSA-449147	Signaling by Interleukins	24	658	0.0433379	0.000125226	0.00651177
R-HSA-9614657	FOXO-mediated transcription of cell death genes	4	23	0.00151485	0.000517707	0.0253676
R-HSA-9012546	Interleukin-18 signaling	3	11	0.000724495	0.000742947	0.0341756
R-HSA-6804115	TP53 regulates transcription of additional cell cycle genes whose exact role in the p53 pathway remain uncertain	4	28	0.00184417	0.00106994	0.0460072
R-HSA-168256	Immune System	61	2698	0.177699	0.00154527	0.0633561
R-HSA-2559582	Senescence-Associated Secretory Phenotype (SASP)	6	91	0.00599355	0.00337799	0.131742
R-HSA-156902	Peptide chain elongation	6	97	0.00638872	0.00458906	0.160617
R-HSA-381042	PERK regulates gene expression	4	42	0.00276625	0.00457122	0.160617
R-HSA-375276	Peptide ligand-binding receptors	9	203	0.0133702	0.00517352	0.1759
R-HSA-8939245	RUNX1 regulates transcription of genes involved in BCR signaling	2	7	0.000461042	0.00557714	0.178469
R-HSA-156842	Eukaryotic Translation Elongation	6	102	0.00671804	0.00582071	0.180442
R-HSA-1799339	SRP-dependent cotranslational protein targeting to membrane	6	119	0.00783771	0.0118233	0.202198
R-HSA-3214842	HDMs demethylate histones	3	31	0.00204176	0.0132317	0.202198
R-HSA-9633012	Response of EIF2AK4 (GCN2) to amino acid deficiency	6	115	0.00757426	0.010132	0.202198
R-HSA-72766	Translation	12	339	0.0223276	0.00783565	0.202198
R-HSA-112409	RAF-independent MAPK1/3 activation	3	28	0.00184417	0.0100877	0.202198
R-HSA-1280215	Cytokine Signaling in Immune system	28	1107	0.0729105	0.00869711	0.202198
R-HSA-9614085	FOXO-mediated transcription	6	110	0.00724495	0.00826936	0.202198
R-HSA-448706	Interleukin-1 processing	2	12	0.000790358	0.0155721	0.202437
R-HSA-199220	Vitamin B5 (pantothenate) metabolism	3	35	0.00230521	0.0182001	0.218401
R-HSA-380994	ATF4 activates genes in response to endoplasmic reticulum stress	3	34	0.00223935	0.0168739	0.218401
R-HSA-6791312	TP53 Regulates Transcription of Cell Cycle Genes	4	65	0.0042811	0.019899	0.238788
R-HSA-5358493	Synthesis of diphthamide-EEF2	2	15	0.000987947	0.0235991	0.25959
R-HSA-975956	Nonsense Mediated Decay (NMD) independent of the Exon Junction Complex (EJC)	5	101	0.00665218	0.0223363	0.25959
R-HSA-9711097	Cellular response to starvation	7	176	0.0115919	0.0220469	0.25959
R-HSA-187037	Signaling by NTRK1 (TRKA)	6	143	0.00941843	0.0262894	0.289183
R-HSA-72764	Eukaryotic Translation Termination	5	106	0.00698149	0.0267435	0.294178
R-HSA-1433559	Regulation of KIT signaling	2	18	0.00118554	0.032964	0.32964
R-HSA-6791226	Major pathway of rRNA processing in the nucleolus and cytosol	7	189	0.0124481	0.0307415	0.32964
R-HSA-2408557	Selenocysteine synthesis	5	112	0.00737667	0.032719	0.32964
R-HSA-168249	Innate Immune System	30	1345	0.0885859	0.0321433	0.32964
R-HSA-163125	Post-translational modification: synthesis of GPI-anchored proteins	5	115	0.00757426	0.0359951	0.359951
R-HSA-1433557	Signaling by SCF-KIT	3	51	0.00335902	0.0470526	0.378345
R-HSA-927802	Nonsense-Mediated Decay (NMD)	5	124	0.00816703	0.0470032	0.378345
R-HSA-975957	Nonsense Mediated Decay (NMD) enhanced by the Exon Junction Complex (EJC)	5	124	0.00816703	0.0470032	0.378345
R-HSA-5205685	PINK1-PRKN Mediated Mitophagy	2	22	0.00144899	0.0472931	0.378345
R-HSA-8868773	rRNA processing in the nucleus and cytosol	7	208	0.0136995	0.0471866	0.378345
R-HSA-2559583	Cellular Senescence	7	200	0.0131726	0.0396982	0.378345
R-HSA-5675221	Negative regulation of MAPK pathway	3	49	0.00322729	0.042673	0.378345
R-HSA-8866910	TFAP2 (AP-2) family regulates transcription of growth factors and their receptors	2	21	0.00138313	0.0435279	0.378345
R-HSA-198725	Nuclear Events (kinase and transcription factor activation)	4	80	0.00526905	0.0382138	0.378345
R-HSA-5633008	TP53 Regulates Transcription of Cell Death Genes	4	83	0.00546664	0.0427359	0.378345
R-HSA-166520	Signaling by NTRKs	6	166	0.0109333	0.0482231	0.385785
R-HSA-8864260	Transcriptional regulation by the AP-2 (TFAP2) family of transcription factors	3	52	0.00342488	0.0493224	0.394579
R-HSA-2142691	Synthesis of Leukotrienes (LT) and Eoxins (EX)	3	52	0.00342488	0.0493224	0.394579
R-HSA-9706374	FLT3 signaling through SRC family kinases	1	6	0.000395179	0.089782	0.457804
R-HSA-74713	IRS activation	1	7	0.000461042	0.103945	0.457804
R-HSA-9027283	Erythropoietin activates STAT5	1	9	0.000592768	0.131615	0.457804
R-HSA-9645135	STAT5 Activation	1	9	0.000592768	0.131615	0.457804
R-HSA-112412	SOS-mediated signalling	1	10	0.000658631	0.14513	0.457804
R-HSA-72731	Recycling of eIF2:GDP	1	10	0.000658631	0.14513	0.457804
R-HSA-9027277	Erythropoietin activates Phospholipase C gamma (PLCG)	1	13	0.000856221	0.18443	0.457804
R-HSA-9027276	Erythropoietin activates Phosphoinositide-3-kinase (PI3K)	1	16	0.00105381	0.22193	0.457804
R-HSA-9027284	Erythropoietin activates RAS	1	19	0.0012514	0.257713	0.457804
R-HSA-8964315	G beta:gamma signalling through BTK	1	19	0.0012514	0.257713	0.457804
R-HSA-73780	RNA Polymerase III Chain Elongation	1	19	0.0012514	0.257713	0.457804
R-HSA-9706369	Negative regulation of FLT3	1	20	0.00131726	0.269273	0.457804
R-HSA-176412	Phosphorylation of the APC/C	1	20	0.00131726	0.269273	0.457804
R-HSA-73772	RNA Polymerase I Promoter Escape	3	61	0.00401765	0.0720542	0.457804
R-HSA-5250924	B-WICH complex positively regulates rRNA expression	3	62	0.00408351	0.0748253	0.457804
R-HSA-418217	G beta:gamma signalling through PLC beta	1	23	0.00151485	0.302887	0.457804
R-HSA-73980	RNA Polymerase III Transcription Termination	1	23	0.00151485	0.302887	0.457804
R-HSA-174048	APC/C:Cdc20 mediated degradation of Cyclin B	1	24	0.00158072	0.313746	0.457804
R-HSA-179409	APC-Cdc20 mediated degradation of Nek2A	1	26	0.00171244	0.334962	0.457804
R-HSA-5693571	Nonhomologous End-Joining (NHEJ)	2	56	0.00368834	0.219331	0.457804
R-HSA-389957	Prefoldin mediated transfer of substrate to CCT/TriC	1	29	0.00191003	0.365566	0.457804
R-HSA-389960	Formation of tubulin folding intermediates by CCT/TriC	1	30	0.00197589	0.375453	0.457804
R-HSA-1296041	Activation of G protein gated Potassium channels	1	31	0.00204176	0.385186	0.457804
R-HSA-997272	Inhibition of voltage gated Ca2+ channels via Gbeta/gamma subunits	1	31	0.00204176	0.385186	0.457804
R-HSA-1296059	G protein gated Potassium channels	1	31	0.00204176	0.385186	0.457804
R-HSA-171306	Packaging Of Telomere Ends	1	34	0.00223935	0.413488	0.457804
R-HSA-9006335	Signaling by Erythropoietin	1	35	0.00230521	0.422631	0.457804
R-HSA-380284	Loss of proteins required for interphase microtubule organization from the centrosome	2	71	0.00467628	0.305808	0.457804
R-HSA-380259	Loss of Nlp from mitotic centrosomes	2	71	0.00467628	0.305808	0.457804
R-HSA-5334118	DNA methylation	1	36	0.00237107	0.431632	0.457804
R-HSA-8854518	AURKA Activation by TPX2	2	74	0.00487387	0.323005	0.457804
R-HSA-380270	Recruitment of mitotic centrosome proteins and complexes	2	81	0.00533491	0.362666	0.457804
R-HSA-380287	Centrosome maturation	2	83	0.00546664	0.373844	0.457804
R-HSA-141424	Amplification of signal from the kinetochores	2	94	0.00619113	0.433759	0.457804
R-HSA-141444	Amplification of signal from unattached kinetochores via a MAD2 inhibitory signal	2	94	0.00619113	0.433759	0.457804
R-HSA-380320	Recruitment of NuMA to mitotic centrosomes	2	97	0.00638872	0.449572	0.457804
R-HSA-5620912	Anchoring of the basal body to the plasma membrane	3	99	0.00652045	0.203905	0.457804
R-HSA-8964616	G beta:gamma signalling through CDC42	1	21	0.00138313	0.280653	0.457804
R-HSA-202040	G-protein activation	1	26	0.00171244	0.334962	0.457804
R-HSA-198203	PI3K/AKT activation	1	13	0.000856221	0.18443	0.457804
R-HSA-397795	G-protein beta:gamma signalling	1	39	0.00256866	0.457804	0.457804
R-HSA-8866911	TFAP2 (AP-2) family regulates transcription of cell cycle factors	1	6	0.000395179	0.089782	0.457804
R-HSA-9020933	Interleukin-23 signaling	1	11	0.000724495	0.158435	0.457804
R-HSA-73863	RNA Polymerase I Transcription Termination	2	33	0.00217348	0.0953295	0.457804
R-HSA-196299	Beta-catenin phosphorylation cascade	1	19	0.0012514	0.257713	0.457804
R-HSA-392170	ADP signalling through P2Y purinoceptor 12	1	26	0.00171244	0.334962	0.457804
R-HSA-3238698	WNT ligand biogenesis and trafficking	1	28	0.00184417	0.355524	0.457804
R-HSA-428930	Thromboxane signalling through TP receptor	1	30	0.00197589	0.375453	0.457804
R-HSA-3928663	EPHA-mediated growth cone collapse	1	33	0.00217348	0.404201	0.457804
R-HSA-5250913	Positive epigenetic regulation of rRNA expression	3	80	0.00526905	0.131993	0.457804
R-HSA-432722	Golgi Associated Vesicle Biogenesis	2	61	0.00401765	0.248101	0.457804
R-HSA-69618	Mitotic Spindle Checkpoint	3	111	0.00731081	0.253109	0.457804
R-HSA-212165	Epigenetic regulation of gene expression	3	139	0.00915498	0.371839	0.457804
R-HSA-5626978	TNFR1-mediated ceramide production	1	6	0.000395179	0.089782	0.457804
R-HSA-176407	Conversion from APC/C:Cdc20 to APC/C:Cdh1 in late anaphase	1	22	0.00144899	0.291857	0.457804
R-HSA-389977	Post-chaperonin tubulin folding pathway	1	25	0.00164658	0.324437	0.457804
R-HSA-3928665	EPH-ephrin mediated repulsion of cells	2	55	0.00362247	0.213609	0.457804
R-HSA-400042	Adrenaline,noradrenaline inhibits insulin secretion	1	32	0.00210762	0.394768	0.457804
R-HSA-389958	Cooperation of Prefoldin and TriC/CCT in actin and tubulin folding	1	37	0.00243694	0.440493	0.457804
R-HSA-73864	RNA Polymerase I Transcription	3	87	0.00573009	0.157378	0.457804
R-HSA-8936459	RUNX1 regulates genes involved in megakaryocyte differentiation and platelet function	2	78	0.00513732	0.345761	0.457804
R-HSA-2467813	Separation of Sister Chromatids	4	195	0.0128433	0.36555	0.457804
R-HSA-392851	Prostacyclin signalling through prostacyclin receptor	1	24	0.00158072	0.313746	0.457804
R-HSA-73854	RNA Polymerase I Promoter Clearance	3	85	0.00559837	0.149975	0.457804
R-HSA-5250941	Negative epigenetic regulation of rRNA expression	3	89	0.00586182	0.164892	0.457804
R-HSA-427413	NoRC negatively regulates rRNA expression	3	80	0.00526905	0.131993	0.457804
R-HSA-5649702	APEX1-Independent Resolution of AP Sites via the Single Nucleotide Replacement Pathway	1	12	0.000790358	0.171534	0.457804
R-HSA-202670	ERKs are inactivated	1	15	0.000987947	0.209625	0.457804
R-HSA-879415	Advanced glycosylation endproduct receptor signaling	1	16	0.00105381	0.22193	0.457804
R-HSA-2559584	Formation of Senescence-Associated Heterochromatin Foci (SAHF)	1	17	0.00111967	0.234045	0.457804
R-HSA-141430	Inactivation of APC/C via direct inhibition of the APC/C complex	1	21	0.00138313	0.280653	0.457804
R-HSA-190840	Microtubule-dependent trafficking of connexons from Golgi to the plasma membrane	1	22	0.00144899	0.291857	0.457804
R-HSA-500657	Presynaptic function of Kainate receptors	1	23	0.00151485	0.302887	0.457804
R-HSA-73762	RNA Polymerase I Transcription Initiation	2	50	0.00329316	0.185258	0.457804
R-HSA-9617324	Negative regulation of NMDA receptor-mediated neuronal transmission	1	27	0.0017783	0.345323	0.457804
R-HSA-76066	RNA Polymerase III Transcription Initiation From Type 2 Promoter	1	27	0.0017783	0.345323	0.457804
R-HSA-76071	RNA Polymerase III Transcription Initiation From Type 3 Promoter	1	28	0.00184417	0.355524	0.457804
R-HSA-392451	G beta:gamma signalling through PI3Kgamma	1	29	0.00191003	0.365566	0.457804
R-HSA-73728	RNA Polymerase I Promoter Opening	1	34	0.00223935	0.413488	0.457804
R-HSA-2428928	IRS-related events triggered by IGF1R	2	69	0.00454456	0.294297	0.457804
R-HSA-2500257	Resolution of Sister Chromatid Cohesion	3	134	0.00882566	0.350624	0.457804
R-HSA-76046	RNA Polymerase III Transcription Initiation	1	36	0.00237107	0.431632	0.457804
R-HSA-68877	Mitotic Prometaphase	4	211	0.0138971	0.421795	0.457804
R-HSA-112399	IRS-mediated signalling	2	65	0.0042811	0.271209	0.457804
R-HSA-74749	Signal attenuation	1	13	0.000856221	0.18443	0.457804
R-HSA-912631	Regulation of signaling by CBL	1	24	0.00158072	0.313746	0.457804
R-HSA-418592	ADP signalling through P2Y purinoceptor 1	1	30	0.00197589	0.375453	0.457804
R-HSA-1296065	Inwardly rectifying K+ channels	1	38	0.0025028	0.449216	0.457804
R-HSA-419408	Lysosphingolipid and LPA receptors	1	19	0.0012514	0.257713	0.457804
R-HSA-389513	CTLA4 inhibitory signaling	1	25	0.00164658	0.324437	0.457804
R-HSA-76061	RNA Polymerase III Transcription Initiation From Type 1 Promoter	1	28	0.00184417	0.355524	0.457804
R-HSA-74751	Insulin receptor signalling cascade	2	72	0.00474215	0.31155	0.457804
R-HSA-9648025	EML4 and NUDC in mitotic spindle formation	3	121	0.00796944	0.295283	0.457804
R-HSA-72312	rRNA processing	7	246	0.0162023	0.0945366	0.457804
R-HSA-456926	Thrombin signalling through proteinase activated receptors (PARs)	1	36	0.00237107	0.431632	0.457804
R-HSA-2428924	IGF1R signaling cascade	2	72	0.00474215	0.31155	0.457804
R-HSA-5205647	Mitophagy	2	31	0.00204176	0.0858127	0.457804
R-HSA-8963901	Chylomicron remodeling	1	17	0.00111967	0.234045	0.457804
R-HSA-9018681	Biosynthesis of protectins	1	18	0.00118554	0.245971	0.457804
R-HSA-141405	Inhibition of the proteolytic activity of APC/C required for the onset of anaphase by mitotic spindle checkpoint components	1	21	0.00138313	0.280653	0.457804
R-HSA-190872	Transport of connexons to the plasma membrane	1	23	0.00151485	0.302887	0.457804
R-HSA-429958	mRNA decay by 3' to 5' exoribonuclease	1	24	0.00158072	0.313746	0.457804
R-HSA-9619483	Activation of AMPK downstream of NMDARs	1	34	0.00223935	0.413488	0.457804
R-HSA-2565942	Regulation of PLK1 Activity at G2/M Transition	2	92	0.00605941	0.423084	0.457804
R-HSA-2404192	Signaling by Type 1 Insulin-like Growth Factor 1 Receptor (IGF1R)	2	73	0.00480801	0.317283	0.457804
R-HSA-390466	Chaperonin-mediated protein folding	2	96	0.00632286	0.444328	0.457804
R-HSA-2160916	Hyaluronan uptake and degradation	1	18	0.00118554	0.245971	0.457804
R-HSA-6811440	Retrograde transport at the Trans-Golgi-Network	2	55	0.00362247	0.213609	0.457804
R-HSA-6809371	Formation of the cornified envelope	4	138	0.00908911	0.172718	0.457804
R-HSA-380972	Energy dependent regulation of mTOR by LKB1-AMPK	1	36	0.00237107	0.431632	0.457804
R-HSA-199992	trans-Golgi Network Vesicle Budding	2	80	0.00526905	0.357048	0.457804
R-HSA-9020702	Interleukin-1 signaling	3	125	0.00823289	0.312297	0.457804
R-HSA-1632852	Macroautophagy	5	150	0.00987947	0.0888679	0.457804
R-HSA-112303	Electric Transmission Across Gap Junctions	1	6	0.000395179	0.089782	0.457804
R-HSA-112307	Transmission across Electrical Synapses	1	6	0.000395179	0.089782	0.457804
R-HSA-426117	Cation-coupled Chloride cotransporters	1	10	0.000658631	0.14513	0.457804
R-HSA-6807062	Cholesterol biosynthesis via lathosterol	1	14	0.000922084	0.197126	0.457804
R-HSA-6807047	Cholesterol biosynthesis via desmosterol	1	14	0.000922084	0.197126	0.457804
R-HSA-1475029	Reversible hydration of carbon dioxide	1	17	0.00111967	0.234045	0.457804
R-HSA-450513	Tristetraprolin (TTP, ZFP36) binds and destabilizes mRNA	1	19	0.0012514	0.257713	0.457804
R-HSA-190861	Gap junction assembly	2	41	0.00270039	0.135986	0.457804
R-HSA-166208	mTORC1-mediated signalling	1	28	0.00184417	0.355524	0.457804
R-HSA-977068	Termination of O-glycan biosynthesis	1	28	0.00184417	0.355524	0.457804
R-HSA-9648895	Response of EIF2AK1 (HRI) to heme deficiency	1	29	0.00191003	0.365566	0.457804
R-HSA-8963889	Assembly of active LPL and LIPC lipase complexes	1	30	0.00197589	0.375453	0.457804
R-HSA-933542	TRAF6 mediated NF-kB activation	1	30	0.00197589	0.375453	0.457804
R-HSA-6811442	Intra-Golgi and retrograde Golgi-to-ER traffic	4	219	0.014424	0.449509	0.457804
R-HSA-418594	G alpha (i) signalling events	10	426	0.0280577	0.135342	0.457804
R-HSA-2142845	Hyaluronan metabolism	1	23	0.00151485	0.302887	0.457804
R-HSA-446652	Interleukin-1 family signaling	6	183	0.012053	0.0700661	0.457804
R-HSA-9612973	Autophagy	5	166	0.0109333	0.121785	0.457804
R-HSA-4755510	SUMOylation of immune response proteins	1	11	0.000724495	0.158435	0.457804
R-HSA-3270619	IRF3-mediated induction of type I IFN	1	19	0.0012514	0.257713	0.457804
R-HSA-450604	KSRP (KHSRP) binds and destabilizes mRNA	1	20	0.00131726	0.269273	0.457804
R-HSA-9020265	Biosynthesis of aspirin-triggered D-series resolvins	1	22	0.00144899	0.291857	0.457804
R-HSA-70221	Glycogen breakdown (glycogenolysis)	1	25	0.00164658	0.324437	0.457804
R-HSA-190828	Gap junction trafficking	2	52	0.00342488	0.196539	0.457804
R-HSA-167044	Signalling to RAS	1	26	0.00171244	0.334962	0.457804
R-HSA-5357956	TNFR1-induced NFkappaB signaling pathway	1	30	0.00197589	0.375453	0.457804
R-HSA-5626467	RHO GTPases activate IQGAPs	1	36	0.00237107	0.431632	0.457804
R-HSA-110330	Recognition and association of DNA glycosylase with site containing an affected purine	1	39	0.00256866	0.457804	0.457804
R-HSA-4085377	SUMOylation of SUMOylation proteins	1	39	0.00256866	0.457804	0.457804
R-HSA-168142	Toll Like Receptor 10 (TLR10) Cascade	3	109	0.00717908	0.244775	0.457804
R-HSA-9663891	Selective autophagy	3	89	0.00586182	0.164892	0.457804
R-HSA-975871	MyD88 cascade initiated on plasma membrane	3	109	0.00717908	0.244775	0.457804
R-HSA-168176	Toll Like Receptor 5 (TLR5) Cascade	3	109	0.00717908	0.244775	0.457804
R-HSA-9018676	Biosynthesis of D-series resolvins	1	27	0.0017783	0.345323	0.457804
R-HSA-140342	Apoptosis induced DNA fragmentation	1	13	0.000856221	0.18443	0.457804
R-HSA-1247673	Erythrocytes take up oxygen and release carbon dioxide	1	16	0.00105381	0.22193	0.457804
R-HSA-450385	Butyrate Response Factor 1 (BRF1) binds and destabilizes mRNA	1	19	0.0012514	0.257713	0.457804
R-HSA-427601	Multifunctional anion exchangers	1	19	0.0012514	0.257713	0.457804
R-HSA-157858	Gap junction trafficking and regulation	2	57	0.0037542	0.225066	0.457804
R-HSA-109704	PI3K Cascade	2	58	0.00382006	0.230812	0.457804
R-HSA-451326	Activation of kainate receptors upon glutamate binding	1	34	0.00223935	0.413488	0.457804
R-HSA-180024	DARPP-32 events	1	35	0.00230521	0.422631	0.457804
R-HSA-372790	Signaling by GPCR	15	875	0.0576302	0.398556	0.457804
R-HSA-189085	Digestion of dietary carbohydrate	1	28	0.00184417	0.355524	0.457804
R-HSA-1592389	Activation of Matrix Metalloproteinases	1	35	0.00230521	0.422631	0.457804
R-HSA-210990	PECAM1 interactions	1	14	0.000922084	0.197126	0.457804
R-HSA-9758881	Uptake of dietary cobalamins into enterocytes	1	15	0.000987947	0.209625	0.457804
R-HSA-525793	Myogenesis	2	32	0.00210762	0.0905338	0.457804
R-HSA-9023661	Biosynthesis of E-series 18(R)-resolvins	1	18	0.00118554	0.245971	0.457804
R-HSA-196783	Coenzyme A biosynthesis	1	21	0.00138313	0.280653	0.457804
R-HSA-1480926	O2/CO2 exchange in erythrocytes	1	24	0.00158072	0.313746	0.457804
R-HSA-198753	ERK/MAPK targets	1	26	0.00171244	0.334962	0.457804
R-HSA-975578	Reactions specific to the complex N-glycan synthesis pathway	1	28	0.00184417	0.355524	0.457804
R-HSA-4641262	Disassembly of the destruction complex and recruitment of AXIN to the membrane	1	33	0.00217348	0.404201	0.457804
R-HSA-1268020	Mitochondrial protein import	2	69	0.00454456	0.294297	0.457804
R-HSA-9668328	Sealing of the nuclear envelope (NE) by ESCRT-III	1	39	0.00256866	0.457804	0.457804
R-HSA-6811558	PI5P, PP2A and IER3 Regulate PI3K/AKT Signaling	3	129	0.00849634	0.329337	0.457804
R-HSA-1482801	Acyl chain remodelling of PS	2	31	0.00204176	0.0858127	0.457804
R-HSA-1237044	Erythrocytes take up carbon dioxide and release oxygen	1	24	0.00158072	0.313746	0.457804
R-HSA-163841	Gamma carboxylation, hypusine formation and arylsulfatase activation	3	74	0.00487387	0.111519	0.457804
R-HSA-420092	Glucagon-type ligand receptors	1	35	0.00230521	0.422631	0.457804
R-HSA-9018679	Biosynthesis of EPA-derived SPMs	1	33	0.00217348	0.404201	0.457804
R-HSA-9758890	Transport of RCbl within the body	1	14	0.000922084	0.197126	0.457804
R-HSA-8876725	Protein methylation	1	21	0.00138313	0.280653	0.457804
R-HSA-9018896	Biosynthesis of E-series 18(S)-resolvins	1	24	0.00158072	0.313746	0.457804
R-HSA-2559586	DNA Damage/Telomere Stress Induced Senescence	2	71	0.00467628	0.305808	0.457804
R-HSA-5663220	RHO GTPases Activate Formins	3	149	0.00981361	0.413825	0.457804
R-HSA-9031628	NGF-stimulated transcription	3	56	0.00368834	0.0589227	0.457804
R-HSA-2586552	Signaling by Leptin	1	13	0.000856221	0.18443	0.457804
R-HSA-6803205	TP53 regulates transcription of several additional cell death genes whose specific roles in p53-dependent apoptosis remain uncertain	2	28	0.00184417	0.0721327	0.457804
R-HSA-74160	Gene expression (Transcription)	31	1893	0.124679	0.426216	0.457804
R-HSA-2262752	Cellular responses to stress	20	1005	0.0661925	0.163464	0.457804
R-HSA-73614	Pyrimidine salvage	1	34	0.00223935	0.413488	0.457804
R-HSA-9010553	Regulation of expression of SLITs and ROBOs	5	183	0.012053	0.162058	0.457804
R-HSA-199418	Negative regulation of the PI3K/AKT network	3	137	0.00902325	0.363365	0.457804
R-HSA-8953897	Cellular responses to stimuli	20	1023	0.067378	0.182901	0.457804
R-HSA-5621575	CD209 (DC-SIGN) signaling	1	30	0.00197589	0.375453	0.457804
R-HSA-162710	Synthesis of glycosylphosphatidylinositol (GPI)	1	37	0.00243694	0.440493	0.457804
R-HSA-977225	Amyloid fiber formation	2	89	0.00586182	0.40688	0.457804
R-HSA-9615017	FOXO-mediated transcription of oxidative stress, metabolic and neuronal genes	2	49	0.00322729	0.179654	0.457804
R-HSA-447115	Interleukin-12 family signaling	3	96	0.00632286	0.191973	0.457804
R-HSA-8940973	RUNX2 regulates osteoblast differentiation	1	34	0.00223935	0.413488	0.457804
R-HSA-156584	Cytosolic sulfonation of small molecules	2	72	0.00474215	0.31155	0.457804
R-HSA-193807	Synthesis of bile acids and bile salts via 27-hydroxycholesterol	1	36	0.00237107	0.431632	0.457804
R-HSA-6803204	TP53 Regulates Transcription of Genes Involved in Cytochrome C Release	2	33	0.00217348	0.0953295	0.457804
R-HSA-417957	P2Y receptors	1	18	0.00118554	0.245971	0.457804
R-HSA-936440	Negative regulators of DDX58/IFIH1 signaling	1	37	0.00243694	0.440493	0.457804
R-HSA-212436	Generic Transcription Pathway	29	1588	0.104591	0.218882	0.457804
R-HSA-422475	Axon guidance	10	585	0.0385299	0.435422	0.457804
R-HSA-418038	Nucleotide-like (purinergic) receptors	1	23	0.00151485	0.302887	0.457804
R-HSA-5673001	RAF/MAP kinase cascade	8	322	0.0212079	0.136141	0.457804
R-HSA-73857	RNA Polymerase II Transcription	29	1730	0.113943	0.37985	0.457804
R-HSA-450282	MAPK targets/ Nuclear events mediated by MAP kinases	1	35	0.00230521	0.422631	0.457804
R-HSA-2151201	Transcriptional activation of mitochondrial biogenesis	2	88	0.00579596	0.40143	0.457804
R-HSA-5684996	MAPK1/MAPK3 signaling	8	329	0.021669	0.148051	0.457804
R-HSA-2408522	Selenoamino acid metabolism	5	180	0.0118554	0.154591	0.457804
R-HSA-1834949	Cytosolic sensors of pathogen-associated DNA	2	78	0.00513732	0.345761	0.457804
R-HSA-9768919	NPAS4 regulates expression of target genes	2	41	0.00270039	0.135986	0.457804
R-HSA-5423646	Aflatoxin activation and detoxification	2	49	0.00322729	0.179654	0.457804
R-HSA-373076	Class A/1 (Rhodopsin-like receptors)	11	414	0.0272673	0.0635787	0.457804
R-HSA-3700989	Transcriptional Regulation by TP53	10	484	0.0318778	0.23093	0.457804
R-HSA-1834941	STING mediated induction of host immune responses	1	24	0.00158072	0.313746	0.457804
R-HSA-6803157	Antimicrobial peptides	3	123	0.00810117	0.303784	0.457804
R-HSA-500792	GPCR ligand binding	12	608	0.0400448	0.248026	0.457804
R-HSA-2022377	Metabolism of Angiotensinogen to Angiotensins	1	27	0.0017783	0.345323	0.457804
R-HSA-2426168	Activation of gene expression by SREBF (SREBP)	2	71	0.00467628	0.305808	0.457804
R-HSA-5620971	Pyroptosis	2	34	0.00223935	0.100196	0.457804
R-HSA-9634815	Transcriptional Regulation by NPAS4	2	60	0.00395179	0.242331	0.457804
R-HSA-8853659	RET signaling	2	43	0.00283211	0.146675	0.457804
R-HSA-5683057	MAPK family signaling cascades	8	380	0.025028	0.24825	0.457804
R-HSA-1266695	Interleukin-7 signaling	1	31	0.00204176	0.385186	0.457804
R-HSA-1655829	Regulation of cholesterol biosynthesis by SREBP (SREBF)	2	87	0.00573009	0.395957	0.457804
R-HSA-216083	Integrin cell surface interactions	2	86	0.00566423	0.390461	0.457804
R-HSA-982772	Growth hormone receptor signaling	1	29	0.00191003	0.365566	0.457804
R-HSA-376176	Signaling by ROBO receptors	5	235	0.0154778	0.309159	0.457804
R-HSA-381119	Unfolded Protein Response (UPR)	4	155	0.0102088	0.226886	0.457804
R-HSA-8950505	Gene and protein expression by JAK-STAT signaling after Interleukin-12 stimulation	2	73	0.00480801	0.317283	0.457804
R-HSA-5218859	Regulated Necrosis	2	73	0.00480801	0.317283	0.457804
R-HSA-9020591	Interleukin-12 signaling	2	84	0.0055325	0.379404	0.457804
R-HSA-416476	G alpha (q) signalling events	5	284	0.0187051	0.45954	0.45954
R-HSA-74752	Signaling by Insulin receptor	2	99	0.00652045	0.459975	0.459975
R-HSA-73884	Base Excision Repair	2	100	0.00658631	0.465134	0.465134
R-HSA-1461957	Beta defensins	1	40	0.00263453	0.466259	0.466259
R-HSA-68616	Assembly of the ORC complex at the origin of replication	1	40	0.00263453	0.466259	0.466259
R-HSA-163359	Glucagon signaling in metabolic regulation	1	40	0.00263453	0.466259	0.466259
R-HSA-4090294	SUMOylation of intracellular receptors	1	40	0.00263453	0.466259	0.466259
R-HSA-6805567	Keratinization	4	226	0.0148851	0.473413	0.473413
R-HSA-392518	Signal amplification	1	41	0.00270039	0.474582	0.474582
R-HSA-6814122	Cooperation of PDCL (PhLP1) and TRiC/CCT in G-protein beta folding	1	41	0.00270039	0.474582	0.474582
R-HSA-8982491	Glycogen metabolism	1	41	0.00270039	0.474582	0.474582
R-HSA-389356	CD28 co-stimulation	1	41	0.00270039	0.474582	0.474582
R-HSA-391251	Protein folding	2	102	0.00671804	0.475364	0.475364
R-HSA-2682334	EPH-Ephrin signaling	2	102	0.00671804	0.475364	0.475364
R-HSA-388396	GPCR downstream signalling	13	794	0.0522953	0.476289	0.476289
R-HSA-983695	Antigen activates B Cell Receptor (BCR) leading to generation of second messengers	2	103	0.0067839	0.480434	0.480434
R-HSA-187687	Signalling to ERKs	1	42	0.00276625	0.482777	0.482777
R-HSA-163560	Triglyceride catabolism	1	42	0.00276625	0.482777	0.482777
R-HSA-110328	Recognition and association of DNA glycosylase with site containing an affected pyrimidine	1	42	0.00276625	0.482777	0.482777
R-HSA-168928	DDX58/IFIH1-mediated induction of interferon-alpha/beta	2	104	0.00684977	0.485475	0.485475
R-HSA-400253	Circadian Clock	2	105	0.00691563	0.490485	0.490485
R-HSA-2142753	Arachidonic acid metabolism	3	168	0.011065	0.490818	0.490818
R-HSA-749476	RNA Polymerase III Abortive And Retractive Initiation	1	43	0.00283211	0.490843	0.490843
R-HSA-74158	RNA Polymerase III Transcription	1	43	0.00283211	0.490843	0.490843
R-HSA-8941326	RUNX2 regulates bone development	1	43	0.00283211	0.490843	0.490843
R-HSA-212300	PRC2 methylates histones and DNA	1	44	0.00289798	0.498785	0.498785
R-HSA-3899300	SUMOylation of transcription cofactors	1	44	0.00289798	0.498785	0.498785
R-HSA-427359	SIRT1 negatively regulates rRNA expression	1	45	0.00296384	0.506603	0.506603
R-HSA-110331	Cleavage of the damaged purine	1	45	0.00296384	0.506603	0.506603
R-HSA-193775	Synthesis of bile acids and bile salts via 24-hydroxycholesterol	1	45	0.00296384	0.506603	0.506603
R-HSA-381340	Transcriptional regulation of white adipocyte differentiation	2	109	0.00717908	0.510217	0.510217
R-HSA-9006934	Signaling by Receptor Tyrosine Kinases	10	621	0.040901	0.510403	0.510403
R-HSA-9675108	Nervous system development	10	621	0.040901	0.510403	0.510403
R-HSA-9035034	RHOF GTPase cycle	1	46	0.0030297	0.5143	0.5143
R-HSA-73927	Depurination	1	46	0.0030297	0.5143	0.5143
R-HSA-975576	N-glycan antennae elongation in the medial/trans-Golgi	1	46	0.0030297	0.5143	0.5143
R-HSA-5357905	Regulation of TNFR1 signaling	1	46	0.0030297	0.5143	0.5143
R-HSA-9009391	Extra-nuclear estrogen signaling	2	111	0.00731081	0.519895	0.519895
R-HSA-9646399	Aggrephagy	1	47	0.00309557	0.521877	0.521877
R-HSA-9607240	FLT3 Signaling	1	48	0.00316143	0.529337	0.529337
R-HSA-9670095	Inhibition of DNA recombination at telomere	1	48	0.00316143	0.529337	0.529337
R-HSA-427389	ERCC6 (CSB) and EHMT2 (G9a) positively regulate rRNA expression	1	48	0.00316143	0.529337	0.529337
R-HSA-73933	Resolution of Abasic Sites (AP sites)	1	48	0.00316143	0.529337	0.529337
R-HSA-8853884	Transcriptional Regulation by VENTX	1	48	0.00316143	0.529337	0.529337
R-HSA-111885	Opioid Signalling	2	113	0.00744253	0.529445	0.529445
R-HSA-442755	Activation of NMDA receptors and postsynaptic events	2	113	0.00744253	0.529445	0.529445
R-HSA-68867	Assembly of the pre-replicative complex	2	114	0.0075084	0.534171	0.534171
R-HSA-5625886	Activated PKN1 stimulates transcription of AR (androgen receptor) regulated genes KLK2 and KLK3	1	49	0.00322729	0.53668	0.53668
R-HSA-6811438	Intra-Golgi traffic	1	49	0.00322729	0.53668	0.53668
R-HSA-9609736	Assembly and cell surface presentation of NMDA receptors	1	49	0.00322729	0.53668	0.53668
R-HSA-975138	TRAF6 mediated induction of NFkB and MAP kinases upon TLR7/8 or 9 activation	2	116	0.00764012	0.543527	0.543527
R-HSA-168164	Toll Like Receptor 3 (TLR3) Cascade	2	116	0.00764012	0.543527	0.543527
R-HSA-165159	MTOR signalling	1	50	0.00329316	0.54391	0.54391
R-HSA-991365	Activation of GABAB receptors	1	50	0.00329316	0.54391	0.54391
R-HSA-381676	Glucagon-like Peptide-1 (GLP1) regulates insulin secretion	1	50	0.00329316	0.54391	0.54391
R-HSA-977444	GABA B receptor activation	1	50	0.00329316	0.54391	0.54391
R-HSA-512988	Interleukin-3, Interleukin-5 and GM-CSF signaling	1	50	0.00329316	0.54391	0.54391
R-HSA-3108232	SUMO E3 ligases SUMOylate target proteins	3	183	0.012053	0.547968	0.547968
R-HSA-975155	MyD88 dependent cascade initiated on endosome	2	117	0.00770599	0.548155	0.548155
R-HSA-68882	Mitotic Anaphase	4	249	0.0163999	0.548884	0.548884
R-HSA-3214841	PKMTs methylate histone lysines	1	51	0.00335902	0.551027	0.551027
R-HSA-8854214	TBC/RABGAPs	1	51	0.00335902	0.551027	0.551027
R-HSA-1461973	Defensins	1	51	0.00335902	0.551027	0.551027
R-HSA-110329	Cleavage of the damaged pyrimidine	1	51	0.00335902	0.551027	0.551027
R-HSA-73928	Depyrimidination	1	51	0.00335902	0.551027	0.551027
R-HSA-2555396	Mitotic Metaphase and Anaphase	4	250	0.0164658	0.552039	0.552039
R-HSA-168181	Toll Like Receptor 7/8 (TLR7/8) Cascade	2	118	0.00777185	0.552751	0.552751
R-HSA-3928662	EPHB-mediated forward signaling	1	52	0.00342488	0.558034	0.558034
R-HSA-196741	Cobalamin (Cbl, vitamin B12) transport and metabolism	1	52	0.00342488	0.558034	0.558034
R-HSA-432040	Vasopressin regulates renal water homeostasis via Aquaporins	1	53	0.00349075	0.564931	0.564931
R-HSA-2172127	DAP12 interactions	1	53	0.00349075	0.564931	0.564931
R-HSA-937061	TRIF(TICAM1)-mediated TLR4 signaling	2	121	0.00796944	0.566341	0.566341
R-HSA-166166	MyD88-independent TLR4 cascade	2	121	0.00796944	0.566341	0.566341
R-HSA-168138	Toll Like Receptor 9 (TLR9) Cascade	2	121	0.00796944	0.566341	0.566341
R-HSA-983705	Signaling by the B Cell Receptor (BCR)	3	189	0.0124481	0.569759	0.569759
R-HSA-774815	Nucleosome assembly	1	54	0.00355661	0.571722	0.571722
R-HSA-606279	Deposition of new CENPA-containing nucleosomes at the centromere	1	54	0.00355661	0.571722	0.571722
R-HSA-75153	Apoptotic execution phase	1	54	0.00355661	0.571722	0.571722
R-HSA-3247509	Chromatin modifying enzymes	4	258	0.0169927	0.576859	0.576859
R-HSA-4839726	Chromatin organization	4	258	0.0169927	0.576859	0.576859
R-HSA-196849	Metabolism of water-soluble vitamins and cofactors	4	258	0.0169927	0.576859	0.576859
R-HSA-2299718	Condensation of Prophase Chromosomes	1	55	0.00362247	0.578407	0.578407
R-HSA-8955332	Carboxyterminal post-translational modifications of tubulin	1	55	0.00362247	0.578407	0.578407
R-HSA-3214858	RMTs methylate histone arginines	1	55	0.00362247	0.578407	0.578407
R-HSA-1483191	Synthesis of PC	1	55	0.00362247	0.578407	0.578407
R-HSA-437239	Recycling pathway of L1	1	55	0.00362247	0.578407	0.578407
R-HSA-445989	TAK1-dependent IKK and NF-kappa-B activation	1	55	0.00362247	0.578407	0.578407
R-HSA-2990846	SUMOylation	3	192	0.0126457	0.580411	0.580411
R-HSA-8953854	Metabolism of RNA	12	789	0.051966	0.58382	0.58382
R-HSA-5620924	Intraflagellar transport	1	56	0.00368834	0.584988	0.584988
R-HSA-9634597	GPER1 signaling	1	56	0.00368834	0.584988	0.584988
R-HSA-8963899	Plasma lipoprotein remodeling	1	56	0.00368834	0.584988	0.584988
R-HSA-75893	TNF signaling	1	56	0.00368834	0.584988	0.584988
R-HSA-8878171	Transcriptional regulation by RUNX1	4	261	0.0171903	0.585964	0.585964
R-HSA-5628897	TP53 Regulates Metabolic Genes	2	126	0.00829876	0.588327	0.588327
R-HSA-70268	Pyruvate metabolism	1	57	0.0037542	0.591466	0.591466
R-HSA-9013405	RHOD GTPase cycle	1	57	0.0037542	0.591466	0.591466
R-HSA-1592230	Mitochondrial biogenesis	2	128	0.00843048	0.596888	0.596888
R-HSA-912446	Meiotic recombination	1	58	0.00382006	0.597844	0.597844
R-HSA-6794361	Neurexins and neuroligins	1	60	0.00395179	0.610304	0.610304
R-HSA-4085001	Sialic acid metabolism	1	60	0.00395179	0.610304	0.610304
R-HSA-1852241	Organelle biogenesis and maintenance	5	338	0.0222617	0.612604	0.612604
R-HSA-69002	DNA Replication Pre-Initiation	2	132	0.00869393	0.613609	0.613609
R-HSA-168898	Toll-like Receptor Cascades	3	202	0.0133044	0.614699	0.614699
R-HSA-9639288	Amino acids regulate mTORC1	1	61	0.00401765	0.616389	0.616389
R-HSA-5676590	NIK-->noncanonical NF-kB signaling	1	61	0.00401765	0.616389	0.616389
R-HSA-8866654	E3 ubiquitin ligases ubiquitinate target proteins	1	61	0.00401765	0.616389	0.616389
R-HSA-166058	MyD88:MAL(TIRAP) cascade initiated on plasma membrane	2	133	0.0087598	0.617706	0.617706
R-HSA-168188	Toll Like Receptor TLR6:TLR2 Cascade	2	133	0.0087598	0.617706	0.617706
R-HSA-1221632	Meiotic synapsis	1	62	0.00408351	0.62238	0.62238
R-HSA-4551638	SUMOylation of chromatin organization proteins	1	62	0.00408351	0.62238	0.62238
R-HSA-3214815	HDACs deacetylate histones	1	63	0.00414938	0.628277	0.628277
R-HSA-418597	G alpha (z) signalling events	1	63	0.00414938	0.628277	0.628277
R-HSA-6811436	COPI-independent Golgi-to-ER retrograde traffic	1	63	0.00414938	0.628277	0.628277
R-HSA-73929	Base-Excision Repair, AP Site Formation	1	63	0.00414938	0.628277	0.628277
R-HSA-168179	Toll Like Receptor TLR1:TLR2 Cascade	2	136	0.00895739	0.629797	0.629797
R-HSA-181438	Toll Like Receptor 2 (TLR2) Cascade	2	136	0.00895739	0.629797	0.629797
R-HSA-1266738	Developmental Biology	19	1279	0.084239	0.630341	0.630341
R-HSA-174084	Autodegradation of Cdh1 by Cdh1:APC/C	1	64	0.00421524	0.634083	0.634083
R-HSA-68886	M Phase	6	416	0.0273991	0.637063	0.637063
R-HSA-69620	Cell Cycle Checkpoints	4	279	0.0183758	0.638144	0.638144
R-HSA-429914	Deadenylation-dependent mRNA decay	1	65	0.0042811	0.639798	0.639798
R-HSA-8935690	Digestion	1	65	0.0042811	0.639798	0.639798
R-HSA-5617833	Cilium Assembly	3	210	0.0138313	0.640745	0.640745
R-HSA-5607761	Dectin-1 mediated noncanonical NF-kB signaling	1	66	0.00434697	0.645424	0.645424
R-HSA-9029569	NR1H3 & NR1H2 regulate gene expression linked to cholesterol transport and efflux	1	66	0.00434697	0.645424	0.645424
R-HSA-8979227	Triglyceride metabolism	1	66	0.00434697	0.645424	0.645424
R-HSA-70263	Gluconeogenesis	1	66	0.00434697	0.645424	0.645424
R-HSA-114608	Platelet degranulation	2	141	0.0092867	0.649286	0.649286
R-HSA-5693565	Recruitment and ATM-mediated phosphorylation of repair and signaling proteins at DNA double strand breaks	1	67	0.00441283	0.650963	0.650963
R-HSA-201722	Formation of the beta-catenin:TCF transactivating complex	1	67	0.00441283	0.650963	0.650963
R-HSA-2022090	Assembly of collagen fibrils and other multimeric structures	1	67	0.00441283	0.650963	0.650963
R-HSA-174154	APC/C:Cdc20 mediated degradation of Securin	1	68	0.00447869	0.656416	0.656416
R-HSA-977443	GABA receptor activation	1	68	0.00447869	0.656416	0.656416
R-HSA-983189	Kinesins	1	68	0.00447869	0.656416	0.656416
R-HSA-3299685	Detoxification of Reactive Oxygen Species	1	68	0.00447869	0.656416	0.656416
R-HSA-1227986	Signaling by ERBB2	1	68	0.00447869	0.656416	0.656416
R-HSA-1442490	Collagen degradation	1	69	0.00454456	0.661784	0.661784
R-HSA-445717	Aquaporin-mediated transport	1	69	0.00454456	0.661784	0.661784
R-HSA-8956321	Nucleotide salvage	1	69	0.00454456	0.661784	0.661784
R-HSA-450294	MAP kinase activation	1	69	0.00454456	0.661784	0.661784
R-HSA-8943724	Regulation of PTEN gene transcription	1	70	0.00461042	0.667068	0.667068
R-HSA-9707616	Heme signaling	1	70	0.00461042	0.667068	0.667068
R-HSA-5658442	Regulation of RAS by GAPs	1	71	0.00467628	0.67227	0.67227
R-HSA-9616222	Transcriptional regulation of granulopoiesis	1	71	0.00467628	0.67227	0.67227
R-HSA-1483206	Glycerophospholipid biosynthesis	3	221	0.0145558	0.674509	0.674509
R-HSA-1474228	Degradation of the extracellular matrix	2	148	0.00974774	0.675197	0.675197
R-HSA-76005	Response to elevated platelet cytosolic Ca2+	2	148	0.00974774	0.675197	0.675197
R-HSA-5690714	CD22 mediated BCR regulation	1	72	0.00474215	0.677391	0.677391
R-HSA-1234176	Oxygen-dependent proline hydroxylation of Hypoxia-inducible Factor Alpha	1	72	0.00474215	0.677391	0.677391
R-HSA-1169091	Activation of NF-kappaB in B cells	1	72	0.00474215	0.677391	0.677391
R-HSA-6790901	rRNA modification in the nucleus and cytosol	1	72	0.00474215	0.677391	0.677391
R-HSA-8963743	Digestion and absorption	1	72	0.00474215	0.677391	0.677391
R-HSA-211976	Endogenous sterols	1	72	0.00474215	0.677391	0.677391
R-HSA-2132295	MHC class II antigen presentation	2	149	0.00981361	0.678769	0.678769
R-HSA-174184	Cdc20:Phospho-APC/C mediated degradation of Cyclin A	1	73	0.00480801	0.682433	0.682433
R-HSA-913709	O-linked glycosylation of mucins	1	73	0.00480801	0.682433	0.682433
R-HSA-179419	APC:Cdc20 mediated degradation of cell cycle proteins prior to satisfation of the cell cycle checkpoint	1	74	0.00487387	0.687396	0.687396
R-HSA-174178	APC/C:Cdh1 mediated degradation of Cdc20 and other APC/C:Cdh1 targeted proteins in late mitosis/early G1	1	74	0.00487387	0.687396	0.687396
R-HSA-5693606	DNA Double Strand Break Response	1	75	0.00493974	0.692282	0.692282
R-HSA-69017	CDK-mediated phosphorylation and removal of Cdc6	1	75	0.00493974	0.692282	0.692282
R-HSA-176409	APC/C:Cdc20 mediated degradation of mitotic proteins	1	76	0.0050056	0.697091	0.697091
R-HSA-3371497	HSP90 chaperone cycle for steroid hormone receptors (SHR) in the presence of ligand	1	76	0.0050056	0.697091	0.697091
R-HSA-176814	Activation of APC/C and APC/C:Cdc20 mediated degradation of mitotic proteins	1	77	0.00507146	0.701826	0.701826
R-HSA-191273	Cholesterol biosynthesis	1	77	0.00507146	0.701826	0.701826
R-HSA-112314	Neurotransmitter receptors and postsynaptic signal transmission	3	232	0.0152802	0.705892	0.705892
R-HSA-193368	Synthesis of bile acids and bile salts via 7alpha-hydroxycholesterol	1	78	0.00513732	0.706487	0.706487
R-HSA-448424	Interleukin-17 signaling	1	78	0.00513732	0.706487	0.706487
R-HSA-975634	Retinoid metabolism and transport	1	79	0.00520319	0.711076	0.711076
R-HSA-5357801	Programmed Cell Death	3	234	0.015412	0.711344	0.711344
R-HSA-5625740	RHO GTPases activate PKNs	1	80	0.00526905	0.715593	0.715593
R-HSA-69473	G2/M DNA damage checkpoint	1	80	0.00526905	0.715593	0.715593
R-HSA-196854	Metabolism of vitamins and cofactors	5	382	0.0251597	0.71674	0.71674
R-HSA-5578749	Transcriptional regulation by small RNAs	1	81	0.00533491	0.72004	0.72004
R-HSA-4086398	Ca2+ pathway	1	81	0.00533491	0.72004	0.72004
R-HSA-1445148	Translocation of SLC2A4 (GLUT4) to the plasma membrane	1	81	0.00533491	0.72004	0.72004
R-HSA-8852276	The role of GTSE1 in G2/M progression after G2 checkpoint	1	83	0.00546664	0.728727	0.728727
R-HSA-176408	Regulation of APC/C activators between G1/S and early anaphase	1	83	0.00546664	0.728727	0.728727
R-HSA-917937	Iron uptake and transport	1	83	0.00546664	0.728727	0.728727
R-HSA-198933	Immunoregulatory interactions between a Lymphoid and a non-Lymphoid cell	4	316	0.0208128	0.731312	0.731312
R-HSA-166016	Toll Like Receptor 4 (TLR4) Cascade	2	165	0.0108674	0.731673	0.731673
R-HSA-8852135	Protein ubiquitination	1	84	0.0055325	0.732969	0.732969
R-HSA-9024446	NR1H2 and NR1H3-mediated signaling	1	85	0.00559837	0.737146	0.737146
R-HSA-425393	Transport of inorganic cations/anions and amino acids/oligopeptides	2	167	0.0109991	0.73774	0.73774
R-HSA-383280	Nuclear Receptor transcription pathway	1	86	0.00566423	0.741257	0.741257
R-HSA-1234174	Cellular response to hypoxia	1	86	0.00566423	0.741257	0.741257
R-HSA-416482	G alpha (12/13) signalling events	1	86	0.00566423	0.741257	0.741257
R-HSA-1257604	PIP3 activates AKT signaling	4	321	0.0211421	0.742417	0.742417
R-HSA-5693532	DNA Double-Strand Break Repair	2	169	0.0111309	0.74369	0.74369
R-HSA-69306	DNA Replication	2	169	0.0111309	0.74369	0.74369
R-HSA-9609507	Protein localization	2	170	0.0111967	0.746622	0.746622
R-HSA-2995410	Nuclear Envelope (NE) Reassembly	1	88	0.00579596	0.749288	0.749288
R-HSA-195258	RHO GTPase Effectors	4	326	0.0214714	0.753173	0.753173
R-HSA-5693607	Processing of DNA double-strand break ends	1	89	0.00586182	0.75321	0.75321
R-HSA-1912408	Pre-NOTCH Transcription and Translation	1	89	0.00586182	0.75321	0.75321
R-HSA-9018677	Biosynthesis of DHA-derived SPMs	1	89	0.00586182	0.75321	0.75321
R-HSA-6806667	Metabolism of fat-soluble vitamins	1	89	0.00586182	0.75321	0.75321
R-HSA-1989781	PPARA activates gene expression	2	175	0.011526	0.760854	0.760854
R-HSA-1168372	Downstream signaling events of B Cell Receptor (BCR)	1	91	0.00599355	0.760872	0.760872
R-HSA-195253	Degradation of beta-catenin by the destruction complex	1	91	0.00599355	0.760872	0.760872
R-HSA-9707564	Cytoprotection by HMOX1	1	91	0.00599355	0.760872	0.760872
R-HSA-211859	Biological oxidations	7	551	0.0362906	0.763128	0.763128
R-HSA-453276	Regulation of mitotic cell cycle	1	92	0.00605941	0.764613	0.764613
R-HSA-174143	APC/C-mediated degradation of cell cycle proteins	1	92	0.00605941	0.764613	0.764613
R-HSA-1500620	Meiosis	1	92	0.00605941	0.764613	0.764613
R-HSA-195721	Signaling by WNT	4	332	0.0218666	0.765622	0.765622
R-HSA-400206	Regulation of lipid metabolism by PPARalpha	2	177	0.0116578	0.766351	0.766351
R-HSA-450531	Regulation of mRNA stability by proteins that bind AU-rich elements	1	93	0.00612527	0.768297	0.768297
R-HSA-6794362	Protein-protein interactions at synapses	1	93	0.00612527	0.768297	0.768297
R-HSA-8939211	ESR-mediated signaling	3	257	0.0169268	0.768552	0.768552
R-HSA-202733	Cell surface interactions at the vascular wall	3	257	0.0169268	0.768552	0.768552
R-HSA-69052	Switching of origins to a post-replicative state	1	94	0.00619113	0.771923	0.771923
R-HSA-6804756	Regulation of TP53 Activity through Phosphorylation	1	95	0.006257	0.775492	0.775492
R-HSA-392499	Metabolism of proteins	31	2214	0.145821	0.777454	0.777454
R-HSA-438064	Post NMDA receptor activation events	1	96	0.00632286	0.779006	0.779006
R-HSA-388841	Costimulation by the CD28 family	1	99	0.00652045	0.789222	0.789222
R-HSA-373080	Class B/2 (Secretin family receptors)	1	99	0.00652045	0.789222	0.789222
R-HSA-71406	Pyruvate metabolism and Citric Acid (TCA) cycle	1	100	0.00658631	0.792522	0.792522
R-HSA-174824	Plasma lipoprotein assembly, remodeling, and clearance	1	102	0.00671804	0.798967	0.798967
R-HSA-2029481	FCGR activation	1	103	0.0067839	0.802115	0.802115
R-HSA-5668541	TNFR2 non-canonical NF-kB pathway	1	104	0.00684977	0.805214	0.805214
R-HSA-1474290	Collagen formation	1	104	0.00684977	0.805214	0.805214
R-HSA-8939236	RUNX1 regulates transcription of genes involved in differentiation of HSCs	1	106	0.00698149	0.811267	0.811267
R-HSA-6811434	COPI-dependent Golgi-to-ER retrograde traffic	1	107	0.00704736	0.814223	0.814223
R-HSA-6807878	COPI-mediated anterograde transport	1	107	0.00704736	0.814223	0.814223
R-HSA-1296071	Potassium Channels	1	107	0.00704736	0.814223	0.814223
R-HSA-422356	Regulation of insulin secretion	1	108	0.00711322	0.817133	0.817133
R-HSA-157579	Telomere Maintenance	1	109	0.00717908	0.819997	0.819997
R-HSA-3214847	HATs acetylate histones	1	110	0.00724495	0.822817	0.822817
R-HSA-70171	Glycolysis	1	110	0.00724495	0.822817	0.822817
R-HSA-9006925	Intracellular signaling by second messengers	4	368	0.0242376	0.8303	0.8303
R-HSA-192105	Synthesis of bile acids and bile salts	1	113	0.00744253	0.831015	0.831015
R-HSA-2559580	Oxidative Stress Induced Senescence	1	114	0.0075084	0.833663	0.833663
R-HSA-1912422	Pre-NOTCH Expression and Processing	1	114	0.0075084	0.833663	0.833663
R-HSA-8856825	Cargo recognition for clathrin-mediated endocytosis	1	115	0.00757426	0.83627	0.83627
R-HSA-5619507	Activation of HOX genes during differentiation	1	116	0.00764012	0.838836	0.838836
R-HSA-5617472	Activation of anterior HOX genes in hindbrain development during early embryogenesis	1	116	0.00764012	0.838836	0.838836
R-HSA-76002	Platelet activation, signaling and aggregation	3	293	0.0192979	0.839292	0.839292
R-HSA-418346	Platelet homeostasis	1	118	0.00777185	0.843848	0.843848
R-HSA-611105	Respiratory electron transport	1	118	0.00777185	0.843848	0.843848
R-HSA-69275	G2/M Transition	2	212	0.013963	0.846152	0.846152
R-HSA-5607764	CLEC7A (Dectin-1) signaling	1	120	0.00790358	0.848705	0.848705
R-HSA-211000	Gene Silencing by RNA	1	120	0.00790358	0.848705	0.848705
R-HSA-453274	Mitotic G2-G2/M phases	2	214	0.0140947	0.849867	0.849867
R-HSA-211945	Phase I - Functionalization of compounds	3	301	0.0198248	0.852222	0.852222
R-HSA-201681	TCF dependent signaling in response to WNT	2	216	0.0142264	0.853501	0.853501
R-HSA-1474165	Reproduction	1	123	0.00810117	0.85571	0.85571
R-HSA-5610787	Hedgehog 'off' state	1	124	0.00816703	0.857972	0.857972
R-HSA-5693567	HDR through Homologous Recombination (HRR) or Single Strand Annealing (SSA)	1	124	0.00816703	0.857972	0.857972
R-HSA-382556	ABC-family proteins mediated transport	1	124	0.00816703	0.857972	0.857972
R-HSA-9006931	Signaling by Nuclear Receptors	4	387	0.025489	0.858021	0.858021
R-HSA-948021	Transport to the Golgi and subsequent modification	2	219	0.014424	0.858802	0.858802
R-HSA-194068	Bile acid and bile salt metabolism	1	125	0.00823289	0.860199	0.860199
R-HSA-5693538	Homology Directed Repair	1	130	0.00856221	0.870824	0.870824
R-HSA-373760	L1CAM interactions	1	130	0.00856221	0.870824	0.870824
R-HSA-2980736	Peptide hormone metabolism	1	130	0.00856221	0.870824	0.870824
R-HSA-1483257	Phospholipid metabolism	3	314	0.020681	0.87131	0.87131
R-HSA-9007101	Rab regulation of trafficking	1	131	0.00862807	0.87285	0.87285
R-HSA-446219	Synthesis of substrates in N-glycan biosythesis	1	131	0.00862807	0.87285	0.87285
R-HSA-1280218	Adaptive Immune System	12	1012	0.0666535	0.874666	0.874666
R-HSA-69239	Synthesis of DNA	1	132	0.00869393	0.874845	0.874845
R-HSA-5173105	O-linked glycosylation	1	133	0.0087598	0.876809	0.876809
R-HSA-68875	Mitotic Prophase	1	135	0.00889152	0.880644	0.880644
R-HSA-73886	Chromosome Maintenance	1	136	0.00895739	0.882517	0.882517
R-HSA-112316	Neuronal System	5	490	0.0322729	0.884594	0.884594
R-HSA-1428517	The citric acid (TCA) cycle and respiratory electron transport	2	238	0.0156754	0.888501	0.888501
R-HSA-1474244	Extracellular matrix organization	3	328	0.0216031	0.889408	0.889408
R-HSA-70326	Glucose metabolism	1	140	0.00922084	0.889721	0.889721
R-HSA-8957322	Metabolism of steroids	3	331	0.0218007	0.892979	0.892979
R-HSA-163685	Integration of energy metabolism	1	147	0.00968188	0.901285	0.901285
R-HSA-8878166	Transcriptional regulation by RUNX2	1	147	0.00968188	0.901285	0.901285
R-HSA-162582	Signal Transduction	40	3023	0.199104	0.901831	0.901831
R-HSA-199991	Membrane Trafficking	7	668	0.0439966	0.902033	0.902033
R-HSA-8856688	Golgi-to-ER retrograde transport	1	148	0.00974774	0.902835	0.902835
R-HSA-8951664	Neddylation	2	249	0.0163999	0.902944	0.902944
R-HSA-877300	Interferon gamma signaling	2	252	0.0165975	0.906571	0.906571
R-HSA-112315	Transmission across Chemical Synapses	3	344	0.0226569	0.907288	0.907288
R-HSA-69278	Cell Cycle, Mitotic	6	596	0.0392544	0.908045	0.908045
R-HSA-69481	G2/M Checkpoints	1	153	0.0100771	0.91023	0.91023
R-HSA-163200	Respiratory electron transport, ATP synthesis by chemiosmotic coupling, and heat production by uncoupling proteins.	1	153	0.0100771	0.91023	0.91023
R-HSA-9018519	Estrogen-dependent gene expression	1	154	0.0101429	0.911641	0.911641
R-HSA-9018678	Biosynthesis of specialized proresolving mediators (SPMs)	1	159	0.0104722	0.918368	0.918368
R-HSA-446193	Biosynthesis of the N-glycan precursor (dolichol lipid-linked oligosaccharide, LLO) and transfer to a nascent protein	1	159	0.0104722	0.918368	0.918368
R-HSA-156580	Phase II - Conjugation of compounds	2	263	0.017322	0.918813	0.918813
R-HSA-8856828	Clathrin-mediated endocytosis	1	161	0.010604	0.920914	0.920914
R-HSA-199977	ER to Golgi Anterograde Transport	1	164	0.0108016	0.924585	0.924585
R-HSA-73887	Death Receptor Signalling	1	164	0.0108016	0.924585	0.924585
R-HSA-9711123	Cellular response to chemical stress	2	269	0.0177172	0.924841	0.924841
R-HSA-3858494	Beta-catenin independent WNT signaling	1	166	0.0109333	0.926938	0.926938
R-HSA-5358351	Signaling by Hedgehog	1	168	0.011065	0.929218	0.929218
R-HSA-2187338	Visual phototransduction	1	169	0.0111309	0.930331	0.930331
R-HSA-6807070	PTEN Regulation	1	171	0.0112626	0.932505	0.932505
R-HSA-73894	DNA Repair	3	381	0.0250939	0.939052	0.939052
R-HSA-5633007	Regulation of TP53 Activity	1	178	0.0117236	0.939597	0.939597
R-HSA-69242	S Phase	1	179	0.0117895	0.940547	0.940547
R-HSA-1630316	Glycosaminoglycan metabolism	1	181	0.0119212	0.942404	0.942404
R-HSA-211897	Cytochrome P450 - arranged by substrate type	1	186	0.0122505	0.946797	0.946797
R-HSA-418555	G alpha (s) signalling events	1	189	0.0124481	0.949271	0.949271
R-HSA-109581	Apoptosis	1	192	0.0126457	0.95163	0.95163
R-HSA-2029480	Fcgamma receptor (FCGR) dependent phagocytosis	1	193	0.0127116	0.952392	0.952392
R-HSA-983231	Factors involved in megakaryocyte development and platelet production	1	194	0.0127774	0.953142	0.953142
R-HSA-983168	Antigen processing: Ubiquitination & Proteasome degradation	2	315	0.0207469	0.958865	0.958865
R-HSA-5621481	C-type lectin receptors (CLRs)	1	203	0.0133702	0.959383	0.959383
R-HSA-446203	Asparagine N-linked glycosylation	3	421	0.0277284	0.961897	0.961897
R-HSA-8978868	Fatty acid metabolism	3	431	0.028387	0.966199	0.966199
R-HSA-194315	Signaling by Rho GTPases	6	709	0.046697	0.967939	0.967939
R-HSA-597592	Post-translational protein modification	17	1604	0.105644	0.971386	0.971386
R-HSA-9716542	Signaling by Rho GTPases, Miro GTPases and RHOBTB3	6	725	0.0477508	0.972643	0.972643
R-HSA-1640170	Cell Cycle	6	734	0.0483435	0.975002	0.975002
R-HSA-71387	Metabolism of carbohydrates	3	456	0.0300336	0.975042	0.975042
R-HSA-5653656	Vesicle-mediated transport	7	828	0.0545347	0.976672	0.976672
R-HSA-71291	Metabolism of amino acids and derivatives	5	666	0.0438648	0.980068	0.980068
R-HSA-15869	Metabolism of nucleotides	1	256	0.016861	0.982527	0.982527
R-HSA-157118	Signaling by NOTCH	1	259	0.0170586	0.983344	0.983344
R-HSA-913531	Interferon Signaling	2	397	0.0261477	0.98651	0.98651
R-HSA-109582	Hemostasis	6	803	0.0528881	0.987744	0.987744
R-HSA-425407	SLC-mediated transmembrane transport	2	420	0.0276625	0.990207	0.990207
R-HSA-9012999	RHO GTPase cycle	2	460	0.030297	0.994426	0.994426
R-HSA-382551	Transport of small molecules	7	971	0.0639531	0.994561	0.994561
R-HSA-983169	Class I MHC mediated antigen processing & presentation	2	479	0.0315484	0.995747	0.995747
R-HSA-556833	Metabolism of lipids	12	1446	0.0952381	0.996173	0.996173
R-HSA-9752946	Expression and translocation of olfactory receptors	3	813	0.0535467	0.999785	0.999785
R-HSA-1430728	Metabolism	34	3641	0.239808	0.999921	0.999921
R-HSA-381753	Olfactory Signaling Pathway	3	887	0.0584206	0.999925	0.999925
R-HSA-9709957	Sensory Perception	4	1262	0.0831193	0.999998	0.999998

## Sheet: OneToTwoWeek_NegGenes_Pathways
Stable Identifier	Pathway Name	Entities Found	Entities Total	Entities Ratio	Entitis pValue	Entities FDR
R-HSA-909733	Interferon alpha/beta signaling	71	190	0.012514	1.11022e-16	1.90958e-14
R-HSA-913531	Interferon Signaling	100	397	0.0261477	1.11022e-16	1.90958e-14
R-HSA-168256	Immune System	197	2698	0.177699	1.11022e-16	1.90958e-14
R-HSA-877300	Interferon gamma signaling	63	252	0.0165975	1.11022e-16	1.90958e-14
R-HSA-1280215	Cytokine Signaling in Immune system	140	1107	0.0729105	1.11022e-16	1.90958e-14
R-HSA-1236974	ER-Phagosome pathway	30	173	0.0113943	8.88178e-16	1.2701e-13
R-HSA-1236977	Endosomal/Vacuolar pathway	22	82	0.00540078	1.33227e-15	1.63869e-13
R-HSA-1236975	Antigen processing-Cross presentation	31	195	0.0128433	2.9976e-15	3.20743e-13
R-HSA-983170	Antigen Presentation: Folding, assembly and peptide loading of class I MHC	22	108	0.00711322	3.0187e-13	2.86776e-11
R-HSA-6783783	Interleukin-10 signaling	19	86	0.00566423	3.23042e-12	2.77816e-10
R-HSA-983169	Class I MHC mediated antigen processing & presentation	42	479	0.0315484	1.378e-11	9.78378e-10
R-HSA-168249	Innate Immune System	75	1345	0.0885859	3.35344e-10	2.21327e-08
R-HSA-198933	Immunoregulatory interactions between a Lymphoid and a non-Lymphoid cell	31	316	0.0208128	5.53778e-10	3.37805e-08
R-HSA-1280218	Adaptive Immune System	61	1012	0.0666535	1.15447e-09	6.5805e-08
R-HSA-6798695	Neutrophil degranulation	35	480	0.0316143	7.26921e-08	3.63461e-06
R-HSA-1169410	Antiviral mechanism by IFN-stimulated genes	14	94	0.00619113	2.85047e-07	1.28271e-05
R-HSA-449147	Signaling by Interleukins	41	658	0.0433379	3.43521e-07	1.47714e-05
R-HSA-5620971	Pyroptosis	8	34	0.00223935	4.09305e-06	0.000159629
R-HSA-6785807	Interleukin-4 and Interleukin-13 signaling	19	211	0.0138971	4.32809e-06	0.000160139
R-HSA-5218859	Regulated Necrosis	11	73	0.00480801	4.7912e-06	0.000167692
R-HSA-1169408	ISG15 antiviral mechanism	11	83	0.00546664	1.56239e-05	0.000531212
R-HSA-69560	Transcriptional activation of p53 responsive genes	4	6	0.000395179	2.17498e-05	0.000674243
R-HSA-69895	Transcriptional activation of cell cycle inhibitor p21	4	6	0.000395179	2.17498e-05	0.000674243
R-HSA-5357801	Programmed Cell Death	18	234	0.015412	5.90672e-05	0.00177201
R-HSA-936440	Negative regulators of DDX58/IFIH1 signaling	7	37	0.00243694	6.42775e-05	0.00186405
R-HSA-1834949	Cytosolic sensors of pathogen-associated DNA	9	78	0.00513732	0.000254218	0.00686388
R-HSA-448706	Interleukin-1 processing	4	12	0.000790358	0.000307718	0.00800067
R-HSA-168928	DDX58/IFIH1-mediated induction of interferon-alpha/beta	10	104	0.00684977	0.000488537	0.012702
R-HSA-9020702	Interleukin-1 signaling	11	125	0.00823289	0.000539379	0.0134845
R-HSA-69580	p53-Dependent G1/S DNA damage checkpoint	8	70	0.00461042	0.000589662	0.0135622
R-HSA-69563	p53-Dependent G1 DNA Damage Response	8	70	0.00461042	0.000589662	0.0135622
R-HSA-8983711	OAS antiviral response	4	15	0.000987947	0.000706619	0.014839
R-HSA-69615	G1/S DNA Damage Checkpoints	8	72	0.00474215	0.00070652	0.014839
R-HSA-9617828	FOXO-mediated transcription of cell cycle genes	5	27	0.0017783	0.000791867	0.0166292
R-HSA-168898	Toll-like Receptor Cascades	14	202	0.0133044	0.00103817	0.0207634
R-HSA-5660668	CLEC7A/inflammasome pathway	3	8	0.000526905	0.00128744	0.0244613
R-HSA-446652	Interleukin-1 family signaling	13	183	0.012053	0.00124839	0.0244613
R-HSA-166016	Toll Like Receptor 4 (TLR4) Cascade	12	165	0.0108674	0.00156369	0.02971
R-HSA-1810476	RIP-mediated NFkB activation via ZBP1	4	19	0.0012514	0.00167674	0.0301814
R-HSA-5668541	TNFR2 non-canonical NF-kB pathway	9	104	0.00684977	0.00188682	0.0339627
R-HSA-918233	TRAF3-dependent IRF activation pathway	4	20	0.00131726	0.0020172	0.0342925
R-HSA-6804116	TP53 Regulates Transcription of Genes Involved in G1 Cell Cycle Arrest	4	20	0.00131726	0.0020172	0.0342925
R-HSA-2562578	TRIF-mediated programmed cell death	3	10	0.000658631	0.00241984	0.0411372
R-HSA-168188	Toll Like Receptor TLR6:TLR2 Cascade	10	133	0.0087598	0.00296617	0.0444926
R-HSA-166058	MyD88:MAL(TIRAP) cascade initiated on plasma membrane	10	133	0.0087598	0.00296617	0.0444926
R-HSA-1169091	Activation of NF-kappaB in B cells	7	72	0.00474215	0.00314465	0.0471697
R-HSA-1606322	ZBP1(DAI) mediated induction of type I IFNs	4	23	0.00151485	0.00331988	0.0485113
R-HSA-181438	Toll Like Receptor 2 (TLR2) Cascade	10	136	0.00895739	0.00346509	0.0485113
R-HSA-168179	Toll Like Receptor TLR1:TLR2 Cascade	10	136	0.00895739	0.00346509	0.0485113
R-HSA-975155	MyD88 dependent cascade initiated on endosome	9	117	0.00770599	0.00407232	0.0570124
R-HSA-168181	Toll Like Receptor 7/8 (TLR7/8) Cascade	9	118	0.00777185	0.00429947	0.0601926
R-HSA-166166	MyD88-independent TLR4 cascade	9	121	0.00796944	0.00504067	0.0631528
R-HSA-937061	TRIF(TICAM1)-mediated TLR4 signaling	9	121	0.00796944	0.00504067	0.0631528
R-HSA-168138	Toll Like Receptor 9 (TLR9) Cascade	9	121	0.00796944	0.00504067	0.0631528
R-HSA-933543	NF-kB activation through FADD/RIP-1 pathway mediated by caspase-8 and -10	3	14	0.000922084	0.00615124	0.0738149
R-HSA-187577	SCF(Skp2)-mediated degradation of p27/p21	6	62	0.00408351	0.00622101	0.0746521
R-HSA-933542	TRAF6 mediated NF-kB activation	4	30	0.00197589	0.00834329	0.0917762
R-HSA-1168372	Downstream signaling events of B Cell Receptor (BCR)	7	91	0.00599355	0.0107165	0.117882
R-HSA-9707587	Regulation of HMOX1 expression and activity	2	6	0.000395179	0.0110169	0.121185
R-HSA-8866911	TFAP2 (AP-2) family regulates transcription of cell cycle factors	2	6	0.000395179	0.0110169	0.121185
R-HSA-975138	TRAF6 mediated induction of NFkB and MAP kinases upon TLR7/8 or 9 activation	8	116	0.00764012	0.0121262	0.121262
R-HSA-9762114	GSK3B and BTRC:CUL1-mediated-degradation of NFE2L2	5	54	0.00355661	0.0144035	0.13805
R-HSA-5656169	Termination of translesion DNA synthesis	4	35	0.00230521	0.0139813	0.13805
R-HSA-5686938	Regulation of TLR by endogenous ligand	4	36	0.00237107	0.0153389	0.13805
R-HSA-3134963	DEx/H-box helicases activate type I IFN and inflammatory cytokines production	2	7	0.000461042	0.0147415	0.13805
R-HSA-5607764	CLEC7A (Dectin-1) signaling	8	120	0.00790358	0.01457	0.13805
R-HSA-8854050	FBXL7 down-regulates AURKA during mitotic entry and in early mitosis	5	55	0.00362247	0.0154638	0.139174
R-HSA-174113	SCF-beta-TrCP mediated degradation of Emi1	5	55	0.00362247	0.0154638	0.139174
R-HSA-936964	Activation of IRF3/IRF7 mediated by TBK1/IKK epsilon	3	20	0.00131726	0.0160027	0.144025
R-HSA-140534	Caspase activation via Death Receptors in the presence of ligand	3	20	0.00131726	0.0160027	0.144025
R-HSA-9604323	Negative regulation of NOTCH4 signaling	5	57	0.0037542	0.017738	0.159642
R-HSA-983168	Antigen processing: Ubiquitination & Proteasome degradation	15	315	0.0207469	0.0200301	0.160241
R-HSA-3134975	Regulation of innate immune responses to cytosolic DNA	3	21	0.00138313	0.0181784	0.160241
R-HSA-8941855	RUNX3 regulates CDKN1A transcription	2	8	0.000526905	0.0189293	0.160241
R-HSA-111457	Release of apoptotic factors from the mitochondria	2	8	0.000526905	0.0189293	0.160241
R-HSA-8939236	RUNX1 regulates transcription of genes involved in differentiation of HSCs	7	106	0.00698149	0.0225603	0.180483
R-HSA-9759194	Nuclear events mediated by NFE2L2	7	106	0.00698149	0.0225603	0.180483
R-HSA-5676590	NIK-->noncanonical NF-kB signaling	5	61	0.00401765	0.0229256	0.183404
R-HSA-5610780	Degradation of GLI1 by the proteasome	5	62	0.00408351	0.0243602	0.194882
R-HSA-5610783	Degradation of GLI2 by the proteasome	5	62	0.00408351	0.0243602	0.194882
R-HSA-5610785	GLI3 is processed to GLI3R by the proteasome	5	62	0.00408351	0.0243602	0.194882
R-HSA-937041	IKK complex recruitment mediated by RIP1	3	24	0.00158072	0.0256439	0.200132
R-HSA-5666185	RHO GTPases Activate Rhotekin and Rhophilins	2	10	0.000658631	0.0285902	0.200132
R-HSA-844456	The NLRP3 inflammasome	3	24	0.00158072	0.0256439	0.200132
R-HSA-933541	TRAF6 mediated IRF7 activation	4	44	0.00289798	0.0291869	0.204308
R-HSA-5689896	Ovarian tumor domain proteases	4	44	0.00289798	0.0291869	0.204308
R-HSA-69202	Cyclin E associated events during G1/S transition	6	88	0.00579596	0.0292986	0.20509
R-HSA-4608870	Asymmetric localization of PCP proteins	5	66	0.00434697	0.0306706	0.214694
R-HSA-5607761	Dectin-1 mediated noncanonical NF-kB signaling	5	66	0.00434697	0.0306706	0.214694
R-HSA-109581	Apoptosis	10	192	0.0126457	0.0311862	0.218304
R-HSA-69656	Cyclin A:Cdk2-associated events at S phase entry	6	90	0.00592768	0.0321467	0.225027
R-HSA-9755511	KEAP1-NFE2L2 pathway	8	141	0.0092867	0.0334998	0.234499
R-HSA-195253	Degradation of beta-catenin by the destruction complex	6	91	0.00599355	0.033636	0.235452
R-HSA-168164	Toll Like Receptor 3 (TLR3) Cascade	7	116	0.00764012	0.0342214	0.23955
R-HSA-164952	The role of Nef in HIV-1 replication and disease pathogenesis	3	29	0.00191003	0.0411968	0.247181
R-HSA-112409	RAF-independent MAPK1/3 activation	3	28	0.00184417	0.0377795	0.247181
R-HSA-110313	Translesion synthesis by Y family DNA polymerases bypasses lesions on DNA template	4	48	0.00316143	0.0381902	0.247181
R-HSA-8878159	Transcriptional regulation by RUNX3	7	118	0.00777185	0.0369576	0.247181
R-HSA-9648895	Response of EIF2AK1 (HRI) to heme deficiency	3	29	0.00191003	0.0411968	0.247181
R-HSA-5621481	C-type lectin receptors (CLRs)	10	203	0.0133702	0.0426883	0.25613
R-HSA-211733	Regulation of activated PAK-2p34 by proteasome mediated degradation	4	50	0.00329316	0.0432241	0.259344
R-HSA-111452	Activation and oligomerization of BAK protein	1	2	0.000131726	0.0508297	0.261921
R-HSA-1236973	Cross-presentation of particulate exogenous antigens (phagosomes)	2	13	0.000856221	0.0459329	0.261921
R-HSA-5357956	TNFR1-induced NFkappaB signaling pathway	3	30	0.00197589	0.0447644	0.261921
R-HSA-9758890	Transport of RCbl within the body	2	14	0.000922084	0.0523841	0.261921
R-HSA-77042	Formation of editosomes by ADAR proteins	1	2	0.000131726	0.0508297	0.261921
R-HSA-68949	Orc1 removal from chromatin	5	73	0.00480801	0.0439928	0.261921
R-HSA-400685	Sema4D in semaphorin signaling	3	31	0.00204176	0.0484804	0.261921
R-HSA-75205	Dissolution of Fibrin Clot	2	14	0.000922084	0.0523841	0.261921
R-HSA-5357769	Caspase activation via extrinsic apoptotic signalling pathway	3	32	0.00210762	0.0523425	0.261921
R-HSA-350562	Regulation of ornithine decarboxylase (ODC)	4	51	0.00335902	0.0458743	0.261921
R-HSA-1236978	Cross-presentation of soluble exogenous antigens (endosomes)	4	53	0.00349075	0.0514406	0.261921
R-HSA-202424	Downstream TCR signaling	7	124	0.00816703	0.0460166	0.261921
R-HSA-69613	p53-Independent G1/S DNA damage checkpoint	4	54	0.00355661	0.0543561	0.271781
R-HSA-69610	p53-Independent DNA Damage Response	4	54	0.00355661	0.0543561	0.271781
R-HSA-69601	Ubiquitin Mediated Degradation of Phosphorylated Cdc25A	4	54	0.00355661	0.0543561	0.271781
R-HSA-169911	Regulation of Apoptosis	4	54	0.00355661	0.0543561	0.271781
R-HSA-349425	Autodegradation of the E3 ubiquitin ligase COP1	4	54	0.00355661	0.0543561	0.271781
R-HSA-75815	Ubiquitin-dependent degradation of Cyclin D	4	54	0.00355661	0.0543561	0.271781
R-HSA-975110	TRAF6 mediated IRF7 activation in TLR7/8 or 9 signaling	2	17	0.00111967	0.0734616	0.293847
R-HSA-5675482	Regulation of necroptotic cell death	3	36	0.00237107	0.0692034	0.293847
R-HSA-5676594	TNF receptor superfamily (TNFSF) members mediating non-canonical NF-kB pathway	2	17	0.00111967	0.0734616	0.293847
R-HSA-975871	MyD88 cascade initiated on plasma membrane	6	109	0.00717908	0.0682155	0.293847
R-HSA-168142	Toll Like Receptor 10 (TLR10) Cascade	6	109	0.00717908	0.0682155	0.293847
R-HSA-168176	Toll Like Receptor 5 (TLR5) Cascade	6	109	0.00717908	0.0682155	0.293847
R-HSA-4641258	Degradation of DVL	4	57	0.0037542	0.063627	0.293847
R-HSA-6804759	Regulation of TP53 Activity through Association with Co-factors	2	17	0.00111967	0.0734616	0.293847
R-HSA-450408	AUF1 (hnRNP D0) binds and destabilizes mRNA	4	56	0.00368834	0.0604498	0.293847
R-HSA-4641257	Degradation of AXIN	4	57	0.0037542	0.063627	0.293847
R-HSA-8939902	Regulation of RUNX2 expression and activity	5	83	0.00546664	0.0682147	0.293847
R-HSA-622312	Inflammasomes	3	34	0.00223935	0.0604957	0.293847
R-HSA-176408	Regulation of APC/C activators between G1/S and early anaphase	5	83	0.00546664	0.0682147	0.293847
R-HSA-380108	Chemokine receptors bind chemokines	4	57	0.0037542	0.063627	0.293847
R-HSA-8852276	The role of GTSE1 in G2/M progression after G2 checkpoint	5	83	0.00546664	0.0682147	0.293847
R-HSA-5661231	Metallothioneins bind metals	2	16	0.00105381	0.0661677	0.293847
R-HSA-73893	DNA Damage Bypass	4	57	0.0037542	0.063627	0.293847
R-HSA-5687128	MAPK6/MAPK4 signaling	6	106	0.00698149	0.061408	0.293847
R-HSA-8941858	Regulation of RUNX3 expression and activity	4	57	0.0037542	0.063627	0.293847
R-HSA-69541	Stabilization of p53	4	59	0.00388593	0.0702387	0.293847
R-HSA-166020	Transfer of LPS from LBP carrier to CD14	1	3	0.000197589	0.0752697	0.301079
R-HSA-9634600	Regulation of glycolysis by fructose 2,6-bisphosphate metabolism	2	18	0.00118554	0.0809993	0.323997
R-HSA-975163	IRAK2 mediated activation of TAK1 complex upon TLR7/8 or 9 stimulation	2	18	0.00118554	0.0809993	0.323997
R-HSA-937072	TRAF6-mediated induction of TAK1 complex within TLR4 complex	2	19	0.0012514	0.0887633	0.324634
R-HSA-5213460	RIPK1-mediated regulated necrosis	3	42	0.00276625	0.0984146	0.324634
R-HSA-399997	Acetylcholine regulates insulin secretion	2	20	0.00131726	0.0967372	0.324634
R-HSA-432720	Lysosome Vesicle Biogenesis	3	43	0.00283211	0.103699	0.324634
R-HSA-75064	mRNA Editing: A to I Conversion	1	4	0.000263453	0.0990819	0.324634
R-HSA-75102	C6 deamination of adenosine	1	4	0.000263453	0.0990819	0.324634
R-HSA-174084	Autodegradation of Cdh1 by Cdh1:APC/C	4	64	0.00421524	0.0882309	0.324634
R-HSA-174154	APC/C:Cdc20 mediated degradation of Securin	4	68	0.00447869	0.104063	0.324634
R-HSA-69052	Switching of origins to a post-replicative state	5	94	0.00619113	0.101837	0.324634
R-HSA-202403	TCR signaling	7	147	0.00968188	0.0931006	0.324634
R-HSA-844615	The AIM2 inflammasome	1	4	0.000263453	0.0990819	0.324634
R-HSA-450294	MAP kinase activation	4	69	0.00454456	0.108211	0.324634
R-HSA-174143	APC/C-mediated degradation of cell cycle proteins	5	92	0.00605941	0.0951986	0.324634
R-HSA-453276	Regulation of mitotic cell cycle	5	92	0.00605941	0.0951986	0.324634
R-HSA-6791312	TP53 Regulates Transcription of Cell Cycle Genes	4	65	0.0042811	0.0920725	0.324634
R-HSA-5660526	Response to metal ions	2	21	0.00138313	0.104905	0.324634
R-HSA-9711123	Cellular response to chemical stress	11	269	0.0177172	0.097753	0.324634
R-HSA-8878166	Transcriptional regulation by RUNX2	7	147	0.00968188	0.0931006	0.324634
R-HSA-6803207	TP53 Regulates Transcription of Caspase Activators and Caspases	2	20	0.00131726	0.0967372	0.324634
R-HSA-5632684	Hedgehog 'on' state	5	92	0.00605941	0.0951986	0.324634
R-HSA-9013694	Signaling by NOTCH4	5	92	0.00605941	0.0951986	0.324634
R-HSA-9707616	Heme signaling	4	70	0.00461042	0.112433	0.337299
R-HSA-5658442	Regulation of RAS by GAPs	4	71	0.00467628	0.116727	0.35018
R-HSA-4086400	PCP/CE pathway	5	99	0.00652045	0.119406	0.358219
R-HSA-5357905	Regulation of TNFR1 signaling	3	46	0.0030297	0.120198	0.360593
R-HSA-168643	Nucleotide-binding domain, leucine rich repeat containing receptor (NLR) signaling pathways	4	72	0.00474215	0.121091	0.363272
R-HSA-1234176	Oxygen-dependent proline hydroxylation of Hypoxia-inducible Factor Alpha	4	72	0.00474215	0.121091	0.363272
R-HSA-5358346	Hedgehog ligand biogenesis	4	72	0.00474215	0.121091	0.363272
R-HSA-5625900	RHO GTPases activate CIT	2	23	0.00151485	0.121762	0.365287
R-HSA-111471	Apoptotic factor-mediated response	2	23	0.00151485	0.121762	0.365287
R-HSA-844623	The IPAF inflammasome	1	5	0.000329316	0.122282	0.366847
R-HSA-5626978	TNFR1-mediated ceramide production	1	6	0.000395179	0.144887	0.367992
R-HSA-450302	activated TAK1 mediates p38 MAPK activation	2	27	0.0017783	0.157177	0.367992
R-HSA-912694	Regulation of IFNA/IFNB signaling	2	28	0.00184417	0.166312	0.367992
R-HSA-9609523	Insertion of tail-anchored proteins into the endoplasmic reticulum membrane	2	25	0.00164658	0.139221	0.367992
R-HSA-75893	TNF signaling	3	56	0.00368834	0.181078	0.367992
R-HSA-1606341	IRF3 mediated activation of type 1 IFN	1	7	0.000461042	0.166911	0.367992
R-HSA-9705462	Inactivation of CSF3 (G-CSF) signaling	2	27	0.0017783	0.157177	0.367992
R-HSA-400451	Free fatty acids regulate insulin secretion	2	28	0.00184417	0.166312	0.367992
R-HSA-69236	G1 Phase	3	52	0.00342488	0.15577	0.367992
R-HSA-69231	Cyclin D associated events in G1	3	52	0.00342488	0.15577	0.367992
R-HSA-381340	Transcriptional regulation of white adipocyte differentiation	5	109	0.00717908	0.158406	0.367992
R-HSA-5627117	RHO GTPases Activate ROCKs	2	24	0.00158072	0.130423	0.367992
R-HSA-416572	Sema4D induced cell migration and growth-cone collapse	2	25	0.00164658	0.139221	0.367992
R-HSA-8964038	LDL clearance	2	28	0.00184417	0.166312	0.367992
R-HSA-199992	trans-Golgi Network Vesicle Budding	4	80	0.00526905	0.158367	0.367992
R-HSA-114608	Platelet degranulation	6	141	0.0092867	0.165838	0.367992
R-HSA-9013957	TLR3-mediated TICAM1-dependent programmed cell death	1	6	0.000395179	0.144887	0.367992
R-HSA-1566977	Fibronectin matrix formation	1	7	0.000461042	0.166911	0.367992
R-HSA-174184	Cdc20:Phospho-APC/C mediated degradation of Cyclin A	4	73	0.00480801	0.125524	0.367992
R-HSA-174178	APC/C:Cdh1 mediated degradation of Cdc20 and other APC/C:Cdh1 targeted proteins in late mitosis/early G1	4	74	0.00487387	0.130025	0.367992
R-HSA-8856825	Cargo recognition for clathrin-mediated endocytosis	5	115	0.00757426	0.183996	0.367992
R-HSA-446210	Synthesis of UDP-N-acetyl-glucosamine	2	29	0.00191003	0.175536	0.367992
R-HSA-3858494	Beta-catenin independent WNT signaling	7	166	0.0109333	0.146645	0.367992
R-HSA-69017	CDK-mediated phosphorylation and removal of Cdc6	4	75	0.00493974	0.134592	0.367992
R-HSA-448424	Interleukin-17 signaling	4	78	0.00513732	0.148676	0.367992
R-HSA-173736	Alternative complement activation	1	6	0.000395179	0.144887	0.367992
R-HSA-163358	PKA-mediated phosphorylation of key metabolic factors	1	7	0.000461042	0.166911	0.367992
R-HSA-71240	Tryptophan catabolism	3	48	0.00316143	0.131698	0.367992
R-HSA-453279	Mitotic G1 phase and G1/S transition	7	174	0.0114602	0.172782	0.367992
R-HSA-68867	Assembly of the pre-replicative complex	5	114	0.0075084	0.179628	0.367992
R-HSA-179419	APC:Cdc20 mediated degradation of cell cycle proteins prior to satisfation of the cell cycle checkpoint	4	74	0.00487387	0.130025	0.367992
R-HSA-1834941	STING mediated induction of host immune responses	2	24	0.00158072	0.130423	0.367992
R-HSA-176409	APC/C:Cdc20 mediated degradation of mitotic proteins	4	76	0.0050056	0.139224	0.367992
R-HSA-176814	Activation of APC/C and APC/C:Cdc20 mediated degradation of mitotic proteins	4	77	0.00507146	0.143919	0.367992
R-HSA-983705	Signaling by the B Cell Receptor (BCR)	8	189	0.0124481	0.12479	0.367992
R-HSA-9614085	FOXO-mediated transcription	5	110	0.00724495	0.162565	0.367992
R-HSA-8948751	Regulation of PTEN stability and activity	4	74	0.00487387	0.130025	0.367992
R-HSA-351202	Metabolism of polyamines	4	80	0.00526905	0.158367	0.367992
R-HSA-5669034	TNFs bind their physiological receptors	2	30	0.00197589	0.184838	0.369676
R-HSA-75158	TRAIL signaling	1	8	0.000526905	0.188369	0.376738
R-HSA-1234174	Cellular response to hypoxia	4	86	0.00566423	0.188744	0.377489
R-HSA-76005	Response to elevated platelet cytosolic Ca2+	6	148	0.00974774	0.192562	0.385124
R-HSA-1266695	Interleukin-7 signaling	2	31	0.00204176	0.194209	0.388417
R-HSA-69206	G1/S Transition	6	150	0.00987947	0.200485	0.40097
R-HSA-197264	Nicotinamide salvaging	3	59	0.00388593	0.200732	0.401464
R-HSA-8964026	Chylomicron clearance	1	9	0.000592768	0.209276	0.406655
R-HSA-8951430	RUNX3 regulates WNT signaling	1	10	0.000658631	0.229645	0.406655
R-HSA-4411364	Binding of TCF/LEF:CTNNB1 to target gene promoters	1	10	0.000658631	0.229645	0.406655
R-HSA-162791	Attachment of GPI anchor to uPAR	1	10	0.000658631	0.229645	0.406655
R-HSA-9768778	Regulation of NPAS4 mRNA translation	1	11	0.000724495	0.249491	0.406655
R-HSA-5218900	CASP8 activity is inhibited	1	12	0.000790358	0.268827	0.406655
R-HSA-5140745	WNT5A-dependent internalization of FZD2, FZD5 and ROR2	1	13	0.000856221	0.287666	0.406655
R-HSA-8948700	Competing endogenous RNAs (ceRNAs) regulate PTEN translation	1	19	0.0012514	0.390956	0.406655
R-HSA-73780	RNA Polymerase III Chain Elongation	1	19	0.0012514	0.390956	0.406655
R-HSA-202430	Translocation of ZAP-70 to Immunological synapse	2	42	0.00276625	0.299347	0.406655
R-HSA-8957275	Post-translational protein phosphorylation	4	109	0.00717908	0.317497	0.406655
R-HSA-2132295	MHC class II antigen presentation	5	149	0.00981361	0.348829	0.406655
R-HSA-389359	CD28 dependent Vav1 pathway	1	17	0.00111967	0.358303	0.406655
R-HSA-168638	NOD1/2 Signaling Pathway	2	41	0.00270039	0.289769	0.406655
R-HSA-4641265	Repression of WNT target genes	1	16	0.00105381	0.341328	0.406655
R-HSA-202427	Phosphorylation of CD3 and TCR zeta chains	2	45	0.00296384	0.327933	0.406655
R-HSA-434316	Fatty Acids bound to GPR40 (FFAR1) regulate insulin secretion	1	20	0.00131726	0.406655	0.406655
R-HSA-1855204	Synthesis of IP3 and IP4 in the cytosol	2	39	0.00256866	0.270573	0.406655
R-HSA-432722	Golgi Associated Vesicle Biogenesis	3	61	0.00401765	0.214103	0.406655
R-HSA-8856828	Clathrin-mediated endocytosis	6	161	0.010604	0.246021	0.406655
R-HSA-434313	Intracellular metabolism of fatty acids regulates insulin secretion	1	9	0.000592768	0.209276	0.406655
R-HSA-3371378	Regulation by c-FLIP	1	11	0.000724495	0.249491	0.406655
R-HSA-9619229	Activation of RAC1 downstream of NMDARs	1	12	0.000790358	0.268827	0.406655
R-HSA-433692	Proton-coupled monocarboxylate transport	1	14	0.000922084	0.306021	0.406655
R-HSA-202670	ERKs are inactivated	1	15	0.000987947	0.323904	0.406655
R-HSA-75892	Platelet Adhesion to exposed collagen	1	16	0.00105381	0.341328	0.406655
R-HSA-2559584	Formation of Senescence-Associated Heterochromatin Foci (SAHF)	1	17	0.00111967	0.358303	0.406655
R-HSA-9696273	RND1 GTPase cycle	2	43	0.00283211	0.308904	0.406655
R-HSA-9013973	TICAM1-dependent activation of IRF3/IRF7	1	14	0.000922084	0.306021	0.406655
R-HSA-209543	p75NTR recruits signalling complexes	1	16	0.00105381	0.341328	0.406655
R-HSA-456926	Thrombin signalling through proteinase activated receptors (PARs)	2	36	0.00237107	0.241768	0.406655
R-HSA-3295583	TRP channels	2	32	0.00210762	0.203638	0.406655
R-HSA-1679131	Trafficking and processing of endosomal TLR	1	16	0.00105381	0.341328	0.406655
R-HSA-8964043	Plasma lipoprotein clearance	2	46	0.0030297	0.337396	0.406655
R-HSA-9707564	Cytoprotection by HMOX1	4	91	0.00599355	0.215353	0.406655
R-HSA-166663	Initial triggering of complement	4	120	0.00790358	0.38194	0.406655
R-HSA-73887	Death Receptor Signalling	6	164	0.0108016	0.258937	0.406655
R-HSA-69416	Dimerization of procaspase-8	1	11	0.000724495	0.249491	0.406655
R-HSA-75072	mRNA Editing	1	12	0.000790358	0.268827	0.406655
R-HSA-2855086	Ficolins bind to repetitive carbohydrate structures on the target cell surface	1	12	0.000790358	0.268827	0.406655
R-HSA-428359	Insulin-like Growth Factor-2 mRNA Binding Proteins (IGF2BPs/IMPs/VICKZs) bind RNA	1	13	0.000856221	0.287666	0.406655
R-HSA-5357786	TNFR1-induced proapoptotic signaling	1	14	0.000922084	0.306021	0.406655
R-HSA-166662	Lectin pathway of complement activation	1	15	0.000987947	0.323904	0.406655
R-HSA-9674555	Signaling by CSF3 (G-CSF)	2	35	0.00230521	0.232191	0.406655
R-HSA-168927	TICAM1, RIP1-mediated IKK complex recruitment	1	19	0.0012514	0.390956	0.406655
R-HSA-4086398	Ca2+ pathway	3	81	0.00533491	0.353858	0.406655
R-HSA-193639	p75NTR signals via NF-kB	1	19	0.0012514	0.390956	0.406655
R-HSA-8853884	Transcriptional Regulation by VENTX	2	48	0.00316143	0.356197	0.406655
R-HSA-9616222	Transcriptional regulation of granulopoiesis	3	71	0.00467628	0.283194	0.406655
R-HSA-8951664	Neddylation	8	249	0.0163999	0.325802	0.406655
R-HSA-9662360	Sensory processing of sound by inner hair cells of the cochlea	3	76	0.0050056	0.318498	0.406655
R-HSA-163767	PP2A-mediated dephosphorylation of key metabolic factors	1	9	0.000592768	0.209276	0.406655
R-HSA-140342	Apoptosis induced DNA fragmentation	1	13	0.000856221	0.287666	0.406655
R-HSA-877312	Regulation of IFNG signaling	1	16	0.00105381	0.341328	0.406655
R-HSA-5684264	MAP3K8 (TPL2)-dependent MAPK1/3 activation	1	18	0.00118554	0.374842	0.406655
R-HSA-9708530	Regulation of BACH1 activity	1	20	0.00131726	0.406655	0.406655
R-HSA-114604	GPVI-mediated activation cascade	2	43	0.00283211	0.308904	0.406655
R-HSA-69242	S Phase	6	179	0.0117895	0.325772	0.406655
R-HSA-9659379	Sensory processing of sound	3	87	0.00573009	0.395961	0.406655
R-HSA-5635838	Activation of SMO	1	20	0.00131726	0.406655	0.406655
R-HSA-196741	Cobalamin (Cbl, vitamin B12) transport and metabolism	2	52	0.00342488	0.393186	0.406655
R-HSA-5610787	Hedgehog 'off' state	5	124	0.00816703	0.224928	0.406655
R-HSA-1170546	Prolactin receptor signaling	1	18	0.00118554	0.374842	0.406655
R-HSA-8878171	Transcriptional regulation by RUNX1	8	261	0.0171903	0.372353	0.406655
R-HSA-76002	Platelet activation, signaling and aggregation	10	293	0.0192979	0.238497	0.406655
R-HSA-6799990	Metal sequestration by antimicrobial proteins	1	13	0.000856221	0.287666	0.406655
R-HSA-3270619	IRF3-mediated induction of type I IFN	1	19	0.0012514	0.390956	0.406655
R-HSA-171007	p38MAPK events	1	19	0.0012514	0.390956	0.406655
R-HSA-389948	PD-1 signaling	2	45	0.00296384	0.327933	0.406655
R-HSA-5689603	UCH proteinases	4	98	0.00645459	0.254151	0.406655
R-HSA-416550	Sema4D mediated inhibition of cell attachment and migration	1	15	0.000987947	0.323904	0.406655
R-HSA-166658	Complement cascade	6	156	0.0102746	0.224939	0.406655
R-HSA-2871837	FCERI mediated NF-kB activation	6	175	0.011526	0.307656	0.406655
R-HSA-5683057	MAPK family signaling cascades	11	380	0.025028	0.405689	0.406655
R-HSA-2672351	Stimuli-sensing channels	4	120	0.00790358	0.38194	0.406655
R-HSA-5689880	Ub-specific processing proteases	7	206	0.0135678	0.293443	0.406655
R-HSA-373755	Semaphorin interactions	3	71	0.00467628	0.283194	0.406655
R-HSA-5358351	Signaling by Hedgehog	6	168	0.011065	0.276429	0.406655
R-HSA-380994	ATF4 activates genes in response to endoplasmic reticulum stress	2	34	0.00223935	0.222638	0.406655
R-HSA-69275	G2/M Transition	7	212	0.013963	0.318054	0.406655
R-HSA-453274	Mitotic G2-G2/M phases	7	214	0.0140947	0.32634	0.406655
R-HSA-416482	G alpha (12/13) signalling events	3	86	0.00566423	0.388986	0.406655
R-HSA-5688426	Deubiquitination	9	289	0.0190344	0.342589	0.406655
R-HSA-419812	Calcitonin-like ligand receptors	1	11	0.000724495	0.249491	0.406655
R-HSA-1433559	Regulation of KIT signaling	1	18	0.00118554	0.374842	0.406655
R-HSA-399955	SEMA3A-Plexin repulsion signaling by inhibiting Integrin adhesion	1	20	0.00131726	0.406655	0.406655
R-HSA-69002	DNA Replication Pre-Initiation	5	132	0.00869393	0.263343	0.406655
R-HSA-69306	DNA Replication	6	169	0.0111309	0.280846	0.406655
R-HSA-5675221	Negative regulation of MAPK pathway	2	49	0.00322729	0.365526	0.406655
R-HSA-73621	Pyrimidine catabolism	2	51	0.00335902	0.384024	0.406655
R-HSA-198323	AKT phosphorylates targets in the cytosol	1	16	0.00105381	0.341328	0.406655
R-HSA-69239	Synthesis of DNA	5	132	0.00869393	0.263343	0.406655
R-HSA-5683826	Surfactant metabolism	2	52	0.00342488	0.393186	0.406655
R-HSA-1502540	Signaling by Activin	1	17	0.00111967	0.358303	0.406655
R-HSA-196757	Metabolism of folate and pterines	2	47	0.00309557	0.346819	0.406655
R-HSA-189483	Heme degradation	2	40	0.00263453	0.280176	0.406655
R-HSA-381042	PERK regulates gene expression	2	42	0.00276625	0.299347	0.406655
R-HSA-1462054	Alpha-defensins	1	11	0.000724495	0.249491	0.406655
R-HSA-417957	P2Y receptors	1	18	0.00118554	0.374842	0.406655
R-HSA-196849	Metabolism of water-soluble vitamins and cofactors	8	258	0.0169927	0.360645	0.406655
R-HSA-8864260	Transcriptional regulation by the AP-2 (TFAP2) family of transcription factors	2	52	0.00342488	0.393186	0.406655
R-HSA-450531	Regulation of mRNA stability by proteins that bind AU-rich elements	4	93	0.00612527	0.226274	0.406655
R-HSA-382556	ABC-family proteins mediated transport	4	124	0.00816703	0.405285	0.406655
R-HSA-196807	Nicotinate metabolism	3	84	0.0055325	0.374979	0.406655
R-HSA-445989	TAK1-dependent IKK and NF-kappa-B activation	2	55	0.00362247	0.420287	0.420287
R-HSA-430039	mRNA decay by 5' to 3' exoribonuclease	1	21	0.00138313	0.421951	0.421951
R-HSA-3000471	Scavenging by Class B Receptors	1	21	0.00138313	0.421951	0.421951
R-HSA-6804114	TP53 Regulates Transcription of Genes Involved in G2 Cell Cycle Arrest	1	21	0.00138313	0.421951	0.421951
R-HSA-196783	Coenzyme A biosynthesis	1	21	0.00138313	0.421951	0.421951
R-HSA-381426	Regulation of Insulin-like Growth Factor (IGF) transport and uptake by Insulin-like Growth Factor Binding Proteins (IGFBPs)	4	127	0.00836462	0.422686	0.422686
R-HSA-4420097	VEGFA-VEGFR2 Pathway	4	129	0.00849634	0.434219	0.434219
R-HSA-1614517	Sulfide oxidation to sulfate	1	22	0.00144899	0.436854	0.436854
R-HSA-9768759	Regulation of NPAS4 gene expression	1	22	0.00144899	0.436854	0.436854
R-HSA-2022857	Keratan sulfate degradation	1	22	0.00144899	0.436854	0.436854
R-HSA-69620	Cell Cycle Checkpoints	8	279	0.0183758	0.442838	0.442838
R-HSA-73980	RNA Polymerase III Transcription Termination	1	23	0.00151485	0.451373	0.451373
R-HSA-432142	Platelet sensitization by LDL	1	23	0.00151485	0.451373	0.451373
R-HSA-418038	Nucleotide-like (purinergic) receptors	1	23	0.00151485	0.451373	0.451373
R-HSA-196791	Vitamin D (calciferol) metabolism	1	23	0.00151485	0.451373	0.451373
R-HSA-9013409	RHOJ GTPase cycle	2	59	0.00388593	0.455431	0.455431
R-HSA-202433	Generation of second messenger molecules	2	59	0.00388593	0.455431	0.455431
R-HSA-1257604	PIP3 activates AKT signaling	9	321	0.0211421	0.459817	0.459817
R-HSA-6807070	PTEN Regulation	5	171	0.0112626	0.460781	0.460781
R-HSA-5673001	RAF/MAP kinase cascade	9	322	0.0212079	0.463465	0.463465
R-HSA-449836	Other interleukin signaling	1	24	0.00158072	0.465519	0.465519
R-HSA-8866654	E3 ubiquitin ligases ubiquitinate target proteins	2	61	0.00401765	0.472539	0.472539
R-HSA-388841	Costimulation by the CD28 family	3	99	0.00652045	0.477547	0.477547
R-HSA-389513	CTLA4 inhibitory signaling	1	25	0.00164658	0.479301	0.479301
R-HSA-5620916	VxPx cargo-targeting to cilium	1	25	0.00164658	0.479301	0.479301
R-HSA-71288	Creatine metabolism	1	25	0.00164658	0.479301	0.479301
R-HSA-1362409	Mitochondrial iron-sulfur cluster biogenesis	1	25	0.00164658	0.479301	0.479301
R-HSA-1181150	Signaling by NODAL	1	25	0.00164658	0.479301	0.479301
R-HSA-1989781	PPARA activates gene expression	5	175	0.011526	0.480675	0.480675
R-HSA-5684996	MAPK1/MAPK3 signaling	9	329	0.021669	0.488863	0.488863
R-HSA-400206	Regulation of lipid metabolism by PPARalpha	5	177	0.0116578	0.490529	0.490529
R-HSA-977606	Regulation of Complement cascade	4	139	0.00915498	0.490771	0.490771
R-HSA-202040	G-protein activation	1	26	0.00171244	0.492728	0.492728
R-HSA-450321	JNK (c-Jun kinases) phosphorylation and activation mediated by activated human TAK1	1	26	0.00171244	0.492728	0.492728
R-HSA-1368082	RORA activates gene expression	1	26	0.00171244	0.492728	0.492728
R-HSA-198753	ERK/MAPK targets	1	26	0.00171244	0.492728	0.492728
R-HSA-140837	Intrinsic Pathway of Fibrin Clot Formation	1	26	0.00171244	0.492728	0.492728
R-HSA-422085	Synthesis, secretion, and deacylation of Ghrelin	1	26	0.00171244	0.492728	0.492728
R-HSA-210991	Basigin interactions	1	26	0.00171244	0.492728	0.492728
R-HSA-167044	Signalling to RAS	1	26	0.00171244	0.492728	0.492728
R-HSA-201681	TCF dependent signaling in response to WNT	6	216	0.0142264	0.49461	0.49461
R-HSA-194138	Signaling by VEGF	4	140	0.00922084	0.496303	0.496303
R-HSA-109606	Intrinsic Pathway for Apoptosis	2	64	0.00421524	0.497584	0.497584
R-HSA-76066	RNA Polymerase III Transcription Initiation From Type 2 Promoter	1	27	0.0017783	0.50581	0.50581
R-HSA-9617324	Negative regulation of NMDA receptor-mediated neuronal transmission	1	27	0.0017783	0.50581	0.50581
R-HSA-8964208	Phenylalanine metabolism	1	27	0.0017783	0.50581	0.50581
R-HSA-2995383	Initiation of Nuclear Envelope (NE) Reformation	1	27	0.0017783	0.50581	0.50581
R-HSA-174403	Glutathione synthesis and recycling	1	27	0.0017783	0.50581	0.50581
R-HSA-157118	Signaling by NOTCH	7	259	0.0170586	0.514211	0.514211
R-HSA-400253	Circadian Clock	3	105	0.00691563	0.516402	0.516402
R-HSA-76071	RNA Polymerase III Transcription Initiation From Type 3 Promoter	1	28	0.00184417	0.518556	0.518556
R-HSA-76061	RNA Polymerase III Transcription Initiation From Type 1 Promoter	1	28	0.00184417	0.518556	0.518556
R-HSA-389357	CD28 dependent PI3K/Akt signaling	1	28	0.00184417	0.518556	0.518556
R-HSA-189200	Cellular hexose transport	1	28	0.00184417	0.518556	0.518556
R-HSA-109582	Hemostasis	21	803	0.0528881	0.526374	0.526374
R-HSA-8943723	Regulation of PTEN mRNA translation	1	29	0.00191003	0.530973	0.530973
R-HSA-444209	Free fatty acid receptors	1	29	0.00191003	0.530973	0.530973
R-HSA-1855167	Synthesis of pyrophosphates in the cytosol	1	29	0.00191003	0.530973	0.530973
R-HSA-982772	Growth hormone receptor signaling	1	29	0.00191003	0.530973	0.530973
R-HSA-8854691	Interleukin-20 family signaling	1	29	0.00191003	0.530973	0.530973
R-HSA-163685	Integration of energy metabolism	4	147	0.00968188	0.534275	0.534275
R-HSA-422356	Regulation of insulin secretion	3	108	0.00711322	0.535241	0.535241
R-HSA-196854	Metabolism of vitamins and cofactors	10	382	0.0251597	0.539007	0.539007
R-HSA-418592	ADP signalling through P2Y purinoceptor 1	1	30	0.00197589	0.543071	0.543071
R-HSA-428930	Thromboxane signalling through TP receptor	1	30	0.00197589	0.543071	0.543071
R-HSA-5621575	CD209 (DC-SIGN) signaling	1	30	0.00197589	0.543071	0.543071
R-HSA-2559586	DNA Damage/Telomere Stress Induced Senescence	2	71	0.00467628	0.55298	0.55298
R-HSA-166786	Creation of C4 and C2 activators	3	111	0.00731081	0.553659	0.553659
R-HSA-389599	Alpha-oxidation of phytanate	1	31	0.00204176	0.554858	0.554858
R-HSA-1482801	Acyl chain remodelling of PS	1	31	0.00204176	0.554858	0.554858
R-HSA-69481	G2/M Checkpoints	4	153	0.0100771	0.565657	0.565657
R-HSA-8934593	Regulation of RUNX1 Expression and Activity	1	32	0.00210762	0.566342	0.566342
R-HSA-9615933	Postmitotic nuclear pore complex (NPC) reformation	1	32	0.00210762	0.566342	0.566342
R-HSA-2122948	Activated NOTCH1 Transmits Signal to the Nucleus	1	32	0.00210762	0.566342	0.566342
R-HSA-1660514	Synthesis of PIPs at the Golgi membrane	1	32	0.00210762	0.566342	0.566342
R-HSA-1855183	Synthesis of IP2, IP, and Ins in the cytosol	1	32	0.00210762	0.566342	0.566342
R-HSA-2454202	Fc epsilon receptor (FCERI) signaling	6	235	0.0154778	0.576231	0.576231
R-HSA-4641262	Disassembly of the destruction complex and recruitment of AXIN to the membrane	1	33	0.00217348	0.57753	0.57753
R-HSA-9013026	RHOB GTPase cycle	2	75	0.00493974	0.582646	0.582646
R-HSA-73614	Pyrimidine salvage	1	34	0.00223935	0.58843	0.58843
R-HSA-189445	Metabolism of porphyrins	2	76	0.0050056	0.589832	0.589832
R-HSA-2559583	Cellular Senescence	5	200	0.0131726	0.597968	0.597968
R-HSA-917729	Endosomal Sorting Complex Required For Transport (ESCRT)	1	35	0.00230521	0.599049	0.599049
R-HSA-199220	Vitamin B5 (pantothenate) metabolism	1	35	0.00230521	0.599049	0.599049
R-HSA-450282	MAPK targets/ Nuclear events mediated by MAP kinases	1	35	0.00230521	0.599049	0.599049
R-HSA-418990	Adherens junctions interactions	1	35	0.00230521	0.599049	0.599049
R-HSA-1592389	Activation of Matrix Metalloproteinases	1	35	0.00230521	0.599049	0.599049
R-HSA-8936459	RUNX1 regulates genes involved in megakaryocyte differentiation and platelet function	2	78	0.00513732	0.603929	0.603929
R-HSA-76046	RNA Polymerase III Transcription Initiation	1	36	0.00237107	0.609396	0.609396
R-HSA-9008059	Interleukin-37 signaling	1	36	0.00237107	0.609396	0.609396
R-HSA-9013106	RHOC GTPase cycle	2	79	0.00520319	0.610838	0.610838
R-HSA-975634	Retinoid metabolism and transport	2	79	0.00520319	0.610838	0.610838
R-HSA-375276	Peptide ligand-binding receptors	5	203	0.0133702	0.611029	0.611029
R-HSA-5625740	RHO GTPases activate PKNs	2	80	0.00526905	0.617656	0.617656
R-HSA-2129379	Molecules associated with elastic fibres	1	37	0.00243694	0.619475	0.619475
R-HSA-1474151	Tetrahydrobiopterin (BH4) synthesis, recycling, salvage and regulation	1	37	0.00243694	0.619475	0.619475
R-HSA-9006925	Intracellular signaling by second messengers	9	368	0.0242376	0.622545	0.622545
R-HSA-5668599	RHO GTPases Activate NADPH Oxidases	1	38	0.0025028	0.629296	0.629296
R-HSA-9013407	RHOH GTPase cycle	1	38	0.0025028	0.629296	0.629296
R-HSA-75105	Fatty acyl-CoA biosynthesis	2	82	0.00540078	0.631015	0.631015
R-HSA-983712	Ion channel transport	5	208	0.0136995	0.632243	0.632243
R-HSA-195721	Signaling by WNT	8	332	0.0218666	0.637015	0.637015
R-HSA-917937	Iron uptake and transport	2	83	0.00546664	0.637557	0.637557
R-HSA-5633008	TP53 Regulates Transcription of Cell Death Genes	2	83	0.00546664	0.637557	0.637557
R-HSA-9022692	Regulation of MECP2 expression and activity	1	39	0.00256866	0.638863	0.638863
R-HSA-1980143	Signaling by NOTCH1	2	84	0.0055325	0.644008	0.644008
R-HSA-8852135	Protein ubiquitination	2	84	0.0055325	0.644008	0.644008
R-HSA-9609507	Protein localization	4	170	0.0111967	0.647823	0.647823
R-HSA-390471	Association of TriC/CCT with target proteins during biosynthesis	1	40	0.00263453	0.648185	0.648185
R-HSA-68616	Assembly of the ORC complex at the origin of replication	1	40	0.00263453	0.648185	0.648185
R-HSA-6811558	PI5P, PP2A and IER3 Regulate PI3K/AKT Signaling	3	129	0.00849634	0.654512	0.654512
R-HSA-9012999	RHO GTPase cycle	11	460	0.030297	0.655753	0.655753
R-HSA-389356	CD28 co-stimulation	1	41	0.00270039	0.657266	0.657266
R-HSA-392518	Signal amplification	1	41	0.00270039	0.657266	0.657266
R-HSA-6814122	Cooperation of PDCL (PhLP1) and TRiC/CCT in G-protein beta folding	1	41	0.00270039	0.657266	0.657266
R-HSA-8953897	Cellular responses to stimuli	25	1023	0.067378	0.660398	0.660398
R-HSA-1655829	Regulation of cholesterol biosynthesis by SREBP (SREBF)	2	87	0.00573009	0.662817	0.662817
R-HSA-2559585	Oncogene Induced Senescence	1	42	0.00276625	0.666113	0.666113
R-HSA-187687	Signalling to ERKs	1	42	0.00276625	0.666113	0.666113
R-HSA-749476	RNA Polymerase III Abortive And Retractive Initiation	1	43	0.00283211	0.674733	0.674733
R-HSA-74158	RNA Polymerase III Transcription	1	43	0.00283211	0.674733	0.674733
R-HSA-9696264	RND3 GTPase cycle	1	43	0.00283211	0.674733	0.674733
R-HSA-8963691	Phenylalanine and tyrosine metabolism	1	43	0.00283211	0.674733	0.674733
R-HSA-1368108	BMAL1:CLOCK,NPAS2 activates circadian gene expression	1	43	0.00283211	0.674733	0.674733
R-HSA-140877	Formation of Fibrin Clot (Clotting Cascade)	1	43	0.00283211	0.674733	0.674733
R-HSA-977225	Amyloid fiber formation	2	89	0.00586182	0.674908	0.674908
R-HSA-6806667	Metabolism of fat-soluble vitamins	2	89	0.00586182	0.674908	0.674908
R-HSA-1483249	Inositol phosphate metabolism	2	90	0.00592768	0.68082	0.68082
R-HSA-3769402	Deactivation of the beta-catenin transactivating complex	1	44	0.00289798	0.683131	0.683131
R-HSA-2559582	Senescence-Associated Secretory Phenotype (SASP)	2	91	0.00599355	0.686645	0.686645
R-HSA-1566948	Elastic fibre formation	1	45	0.00296384	0.691312	0.691312
R-HSA-193775	Synthesis of bile acids and bile salts via 24-hydroxycholesterol	1	45	0.00296384	0.691312	0.691312
R-HSA-452723	Transcriptional regulation of pluripotent stem cells	1	45	0.00296384	0.691312	0.691312
R-HSA-2565942	Regulation of PLK1 Activity at G2/M Transition	2	92	0.00605941	0.692382	0.692382
R-HSA-199418	Negative regulation of the PI3K/AKT network	3	137	0.00902325	0.693758	0.693758
R-HSA-9035034	RHOF GTPase cycle	1	46	0.0030297	0.699283	0.699283
R-HSA-5218920	VEGFR2 mediated vascular permeability	1	46	0.0030297	0.699283	0.699283
R-HSA-9010553	Regulation of expression of SLITs and ROBOs	4	183	0.012053	0.703296	0.703296
R-HSA-8876198	RAB GEFs exchange GTP for GDP on RABs	2	94	0.00619113	0.703596	0.703596
R-HSA-381771	Synthesis, secretion, and inactivation of Glucagon-like Peptide-1 (GLP-1)	1	47	0.00309557	0.707048	0.707048
R-HSA-390466	Chaperonin-mediated protein folding	2	96	0.00632286	0.714468	0.714468
R-HSA-173623	Classical antibody-mediated complement activation	2	97	0.00638872	0.719778	0.719778
R-HSA-5674135	MAP2K and MAPK activation	1	49	0.00322729	0.721984	0.721984
R-HSA-379716	Cytosolic tRNA aminoacylation	1	50	0.00329316	0.729164	0.729164
R-HSA-373080	Class B/2 (Secretin family receptors)	2	99	0.00652045	0.730149	0.730149
R-HSA-9013423	RAC3 GTPase cycle	2	100	0.00658631	0.735211	0.735211
R-HSA-75876	Synthesis of very long-chain fatty acyl-CoAs	1	51	0.00335902	0.73616	0.73616
R-HSA-8854214	TBC/RABGAPs	1	51	0.00335902	0.73616	0.73616
R-HSA-400508	Incretin synthesis, secretion, and inactivation	1	51	0.00335902	0.73616	0.73616
R-HSA-1638074	Keratan sulfate/keratin metabolism	1	51	0.00335902	0.73616	0.73616
R-HSA-1461973	Defensins	1	51	0.00335902	0.73616	0.73616
R-HSA-1433557	Signaling by SCF-KIT	1	51	0.00335902	0.73616	0.73616
R-HSA-1614558	Degradation of cysteine and homocysteine	1	52	0.00342488	0.742975	0.742975
R-HSA-983231	Factors involved in megakaryocyte development and platelet production	4	194	0.0127774	0.745092	0.745092
R-HSA-174824	Plasma lipoprotein assembly, remodeling, and clearance	2	102	0.00671804	0.745094	0.745094
R-HSA-391251	Protein folding	2	102	0.00671804	0.745094	0.745094
R-HSA-2467813	Separation of Sister Chromatids	4	195	0.0128433	0.748659	0.748659
R-HSA-2172127	DAP12 interactions	1	53	0.00349075	0.749615	0.749615
R-HSA-75153	Apoptotic execution phase	1	54	0.00355661	0.756083	0.756083
R-HSA-437239	Recycling pathway of L1	1	55	0.00362247	0.762385	0.762385
R-HSA-2262752	Cellular responses to stress	23	1005	0.0661925	0.769625	0.769625
R-HSA-5620920	Cargo trafficking to the periciliary membrane	1	57	0.0037542	0.774506	0.774506
R-HSA-70268	Pyruvate metabolism	1	57	0.0037542	0.774506	0.774506
R-HSA-2122947	NOTCH1 Intracellular Domain Regulates Transcription	1	57	0.0037542	0.774506	0.774506
R-HSA-9013405	RHOD GTPase cycle	1	57	0.0037542	0.774506	0.774506
R-HSA-68882	Mitotic Anaphase	5	249	0.0163999	0.778007	0.778007
R-HSA-2555396	Mitotic Metaphase and Anaphase	5	250	0.0164658	0.780925	0.780925
R-HSA-70171	Glycolysis	2	110	0.00724495	0.781517	0.781517
R-HSA-193704	p75 NTR receptor-mediated signalling	2	110	0.00724495	0.781517	0.781517
R-HSA-9013148	CDC42 GTPase cycle	3	159	0.0104722	0.78419	0.78419
R-HSA-6794361	Neurexins and neuroligins	1	60	0.00395179	0.79154	0.79154
R-HSA-9634815	Transcriptional Regulation by NPAS4	1	60	0.00395179	0.79154	0.79154
R-HSA-2559580	Oxidative Stress Induced Senescence	2	114	0.0075084	0.797961	0.797961
R-HSA-202733	Cell surface interactions at the vascular wall	5	257	0.0169268	0.800531	0.800531
R-HSA-163125	Post-translational modification: synthesis of GPI-anchored proteins	2	115	0.00757426	0.801897	0.801897
R-HSA-1221632	Meiotic synapsis	1	62	0.00408351	0.802177	0.802177
R-HSA-6811436	COPI-independent Golgi-to-ER retrograde traffic	1	63	0.00414938	0.807291	0.807291
R-HSA-9013406	RHOQ GTPase cycle	1	63	0.00414938	0.807291	0.807291
R-HSA-9753281	Paracetamol ADME	1	63	0.00414938	0.807291	0.807291
R-HSA-418597	G alpha (z) signalling events	1	63	0.00414938	0.807291	0.807291
R-HSA-193648	NRAGE signals death through JNK	1	64	0.00421524	0.812272	0.812272
R-HSA-9662361	Sensory processing of sound by outer hair cells of the cochlea	1	64	0.00421524	0.812272	0.812272
R-HSA-5621480	Dectin-2 family	1	65	0.0042811	0.817126	0.817126
R-HSA-429914	Deadenylation-dependent mRNA decay	1	65	0.0042811	0.817126	0.817126
R-HSA-9029569	NR1H3 & NR1H2 regulate gene expression linked to cholesterol transport and efflux	1	66	0.00434697	0.821854	0.821854
R-HSA-201722	Formation of the beta-catenin:TCF transactivating complex	1	67	0.00441283	0.82646	0.82646
R-HSA-9033241	Peroxisomal protein import	1	67	0.00441283	0.82646	0.82646
R-HSA-112043	PLC beta mediated events	1	67	0.00441283	0.82646	0.82646
R-HSA-8873719	RAB geranylgeranylation	1	68	0.00447869	0.830948	0.830948
R-HSA-8978934	Metabolism of cofactors	1	68	0.00447869	0.830948	0.830948
R-HSA-156590	Glutathione conjugation	1	68	0.00447869	0.830948	0.830948
R-HSA-3299685	Detoxification of Reactive Oxygen Species	1	68	0.00447869	0.830948	0.830948
R-HSA-421270	Cell-cell junction organization	1	68	0.00447869	0.830948	0.830948
R-HSA-379724	tRNA Aminoacylation	1	68	0.00447869	0.830948	0.830948
R-HSA-6803157	Antimicrobial peptides	2	123	0.00810117	0.83101	0.83101
R-HSA-1268020	Mitochondrial protein import	1	69	0.00454456	0.835319	0.835319
R-HSA-1660499	Synthesis of PIPs at the plasma membrane	1	69	0.00454456	0.835319	0.835319
R-HSA-8956321	Nucleotide salvage	1	69	0.00454456	0.835319	0.835319
R-HSA-6784531	tRNA processing in the nucleus	1	70	0.00461042	0.839578	0.839578
R-HSA-2426168	Activation of gene expression by SREBF (SREBP)	1	71	0.00467628	0.843727	0.843727
R-HSA-373076	Class A/1 (Rhodopsin-like receptors)	8	414	0.0272673	0.846899	0.846899
R-HSA-936837	Ion transport by P-type ATPases	1	72	0.00474215	0.847769	0.847769
R-HSA-112040	G-protein mediated events	1	73	0.00480801	0.851707	0.851707
R-HSA-2980736	Peptide hormone metabolism	2	130	0.00856221	0.853263	0.853263
R-HSA-9007101	Rab regulation of trafficking	2	131	0.00862807	0.856215	0.856215
R-HSA-446219	Synthesis of substrates in N-glycan biosythesis	2	131	0.00862807	0.856215	0.856215
R-HSA-376176	Signaling by ROBO receptors	4	235	0.0154778	0.861993	0.861993
R-HSA-3371497	HSP90 chaperone cycle for steroid hormone receptors (SHR) in the presence of ligand	1	76	0.0050056	0.862921	0.862921
R-HSA-193368	Synthesis of bile acids and bile salts via 7alpha-hydroxycholesterol	1	78	0.00513732	0.869922	0.869922
R-HSA-418555	G alpha (s) signalling events	3	189	0.0124481	0.870886	0.870886
R-HSA-499943	Interconversion of nucleotide di- and triphosphates	1	80	0.00526905	0.876567	0.876567
R-HSA-198725	Nuclear Events (kinase and transcription factor activation)	1	80	0.00526905	0.876567	0.876567
R-HSA-1445148	Translocation of SLC2A4 (GLUT4) to the plasma membrane	1	81	0.00533491	0.879762	0.879762
R-HSA-3108214	SUMOylation of DNA damage response and repair proteins	1	81	0.00533491	0.879762	0.879762
R-HSA-204998	Cell death signalling via NRAGE, NRIF and NADE	1	81	0.00533491	0.879762	0.879762
R-HSA-70326	Glucose metabolism	2	140	0.00922084	0.880439	0.880439
R-HSA-1222556	ROS and RNS production in phagocytes	1	82	0.00540078	0.882874	0.882874
R-HSA-187037	Signaling by NTRK1 (TRKA)	2	143	0.00941843	0.887639	0.887639
R-HSA-8956319	Nucleotide catabolism	2	144	0.00948429	0.889949	0.889949
R-HSA-9024446	NR1H2 and NR1H3-mediated signaling	1	85	0.00559837	0.891736	0.891736
R-HSA-216083	Integrin cell surface interactions	1	86	0.00566423	0.894539	0.894539
R-HSA-2995410	Nuclear Envelope (NE) Reassembly	1	88	0.00579596	0.899929	0.899929
R-HSA-2151201	Transcriptional activation of mitochondrial biogenesis	1	88	0.00579596	0.899929	0.899929
R-HSA-5663220	RHO GTPases Activate Formins	2	149	0.00981361	0.90085	0.90085
R-HSA-1912408	Pre-NOTCH Transcription and Translation	1	89	0.00586182	0.90252	0.90252
R-HSA-390918	Peroxisomal lipid metabolism	1	90	0.00592768	0.905045	0.905045
R-HSA-1500620	Meiosis	1	92	0.00605941	0.909899	0.909899
R-HSA-9013404	RAC2 GTPase cycle	1	92	0.00605941	0.909899	0.909899
R-HSA-1614635	Sulfur amino acid metabolism	1	92	0.00605941	0.909899	0.909899
R-HSA-6794362	Protein-protein interactions at synapses	1	93	0.00612527	0.912233	0.912233
R-HSA-381119	Unfolded Protein Response (UPR)	2	155	0.0102088	0.912602	0.912602
R-HSA-6807505	RNA polymerase II transcribes snRNA genes	1	94	0.00619113	0.914506	0.914506
R-HSA-5419276	Mitochondrial translation termination	1	94	0.00619113	0.914506	0.914506
R-HSA-5389840	Mitochondrial translation elongation	1	94	0.00619113	0.914506	0.914506
R-HSA-446728	Cell junction organization	1	95	0.006257	0.916721	0.916721
R-HSA-5368286	Mitochondrial translation initiation	1	96	0.00632286	0.918878	0.918878
R-HSA-438064	Post NMDA receptor activation events	1	96	0.00632286	0.918878	0.918878
R-HSA-446193	Biosynthesis of the N-glycan precursor (dolichol lipid-linked oligosaccharide, LLO) and transfer to a nascent protein	2	159	0.0104722	0.919699	0.919699
R-HSA-5620912	Anchoring of the basal body to the plasma membrane	1	99	0.00652045	0.925021	0.925021
R-HSA-8986944	Transcriptional Regulation by MECP2	1	100	0.00658631	0.926964	0.926964
R-HSA-71406	Pyruvate metabolism and Citric Acid (TCA) cycle	1	100	0.00658631	0.926964	0.926964
R-HSA-112310	Neurotransmitter release cycle	1	100	0.00658631	0.926964	0.926964
R-HSA-5368287	Mitochondrial translation	1	102	0.00671804	0.930701	0.930701
R-HSA-166520	Signaling by NTRKs	2	166	0.0109333	0.930831	0.930831
R-HSA-2029481	FCGR activation	1	103	0.0067839	0.932497	0.932497
R-HSA-983695	Antigen activates B Cell Receptor (BCR) leading to generation of second messengers	1	103	0.0067839	0.932497	0.932497
R-HSA-199991	Membrane Trafficking	12	668	0.0439966	0.933604	0.933604
R-HSA-2187338	Visual phototransduction	2	169	0.0111309	0.935142	0.935142
R-HSA-77289	Mitochondrial Fatty Acid Beta-Oxidation	1	105	0.00691563	0.935951	0.935951
R-HSA-3700989	Transcriptional Regulation by TP53	8	484	0.0318778	0.937414	0.937414
R-HSA-416476	G alpha (q) signalling events	4	284	0.0187051	0.93884	0.93884
R-HSA-2730905	Role of LAT2/NTAL/LAB on calcium mobilization	1	107	0.00704736	0.939228	0.939228
R-HSA-6807878	COPI-mediated anterograde transport	1	107	0.00704736	0.939228	0.939228
R-HSA-5633007	Regulation of TP53 Activity	2	178	0.0117236	0.9466	0.9466
R-HSA-1483255	PI Metabolism	1	112	0.00737667	0.946709	0.946709
R-HSA-1640170	Cell Cycle	13	734	0.0483435	0.947314	0.947314
R-HSA-111885	Opioid Signalling	1	113	0.00744253	0.948091	0.948091
R-HSA-442755	Activation of NMDA receptors and postsynaptic events	1	113	0.00744253	0.948091	0.948091
R-HSA-192105	Synthesis of bile acids and bile salts	1	113	0.00744253	0.948091	0.948091
R-HSA-372790	Signaling by GPCR	16	875	0.0576302	0.949174	0.949174
R-HSA-1912422	Pre-NOTCH Expression and Processing	1	114	0.0075084	0.949437	0.949437
R-HSA-418346	Platelet homeostasis	1	118	0.00777185	0.954483	0.954483
R-HSA-611105	Respiratory electron transport	1	118	0.00777185	0.954483	0.954483
R-HSA-388396	GPCR downstream signalling	14	794	0.0522953	0.95508	0.95508
R-HSA-500792	GPCR ligand binding	10	608	0.0400448	0.956681	0.956681
R-HSA-9013149	RAC1 GTPase cycle	2	191	0.0125799	0.959804	0.959804
R-HSA-1474165	Reproduction	1	123	0.00810117	0.96009	0.96009
R-HSA-2871796	FCERI mediated MAPK activation	1	124	0.00816703	0.961126	0.961126
R-HSA-194068	Bile acid and bile salt metabolism	1	125	0.00823289	0.962135	0.962135
R-HSA-5628897	TP53 Regulates Metabolic Genes	1	126	0.00829876	0.963118	0.963118
R-HSA-15869	Metabolism of nucleotides	3	256	0.016861	0.963356	0.963356
R-HSA-1592230	Mitochondrial biogenesis	1	128	0.00843048	0.965008	0.965008
R-HSA-2871809	FCERI mediated Ca+2 mobilization	1	129	0.00849634	0.965916	0.965916
R-HSA-418594	G alpha (i) signalling events	6	426	0.0280577	0.966692	0.966692
R-HSA-373760	L1CAM interactions	1	130	0.00856221	0.966801	0.966801
R-HSA-1500931	Cell-Cell communication	1	134	0.00882566	0.970117	0.970117
R-HSA-9006936	Signaling by TGFB family members	1	136	0.00895739	0.971649	0.971649
R-HSA-1474244	Extracellular matrix organization	4	328	0.0216031	0.972213	0.972213
R-HSA-6809371	Formation of the cornified envelope	1	138	0.00908911	0.973103	0.973103
R-HSA-8957322	Metabolism of steroids	4	331	0.0218007	0.973713	0.973713
R-HSA-69278	Cell Cycle, Mitotic	9	596	0.0392544	0.974093	0.974093
R-HSA-194315	Signaling by Rho GTPases	11	709	0.046697	0.978595	0.978595
R-HSA-8856688	Golgi-to-ER retrograde transport	1	148	0.00974774	0.979329	0.979329
R-HSA-1474228	Degradation of the extracellular matrix	1	148	0.00974774	0.979329	0.979329
R-HSA-1632852	Macroautophagy	1	150	0.00987947	0.98039	0.98039
R-HSA-71291	Metabolism of amino acids and derivatives	10	666	0.0438648	0.980525	0.980525
R-HSA-163200	Respiratory electron transport, ATP synthesis by chemiosmotic coupling, and heat production by uncoupling proteins.	1	153	0.0100771	0.98188	0.98188
R-HSA-8980692	RHOA GTPase cycle	1	154	0.0101429	0.982352	0.982352
R-HSA-9018519	Estrogen-dependent gene expression	1	154	0.0101429	0.982352	0.982352
R-HSA-9716542	Signaling by Rho GTPases, Miro GTPases and RHOBTB3	11	725	0.0477508	0.982866	0.982866
R-HSA-5653656	Vesicle-mediated transport	13	828	0.0545347	0.983865	0.983865
R-HSA-68886	M Phase	5	416	0.0273991	0.984332	0.984332
R-HSA-422475	Axon guidance	8	585	0.0385299	0.985908	0.985908
R-HSA-1428517	The citric acid (TCA) cycle and respiratory electron transport	2	238	0.0156754	0.985989	0.985989
R-HSA-199977	ER to Golgi Anterograde Transport	1	164	0.0108016	0.986441	0.986441
R-HSA-425366	Transport of bile salts and organic acids, metal ions and amine compounds	1	165	0.0108674	0.986794	0.986794
R-HSA-9612973	Autophagy	1	166	0.0109333	0.987137	0.987137
R-HSA-2173782	Binding and Uptake of Ligands by Scavenger Receptors	1	168	0.011065	0.987798	0.987798
R-HSA-73894	DNA Repair	4	381	0.0250939	0.989857	0.989857
R-HSA-382551	Transport of small molecules	15	971	0.0639531	0.991188	0.991188
R-HSA-195258	RHO GTPase Effectors	3	326	0.0214714	0.991242	0.991242
R-HSA-1630316	Glycosaminoglycan metabolism	1	181	0.0119212	0.991341	0.991341
R-HSA-3108232	SUMO E3 ligases SUMOylate target proteins	1	183	0.012053	0.991786	0.991786
R-HSA-72306	tRNA processing	1	184	0.0121188	0.992	0.992
R-HSA-9675108	Nervous system development	8	621	0.040901	0.9921	0.9921
R-HSA-2990846	SUMOylation	1	192	0.0126457	0.993524	0.993524
R-HSA-2029480	Fcgamma receptor (FCGR) dependent phagocytosis	1	193	0.0127116	0.993693	0.993693
R-HSA-446203	Asparagine N-linked glycosylation	4	421	0.0277284	0.995418	0.995418
R-HSA-597592	Post-translational protein modification	27	1604	0.105644	0.995925	0.995925
R-HSA-5617833	Cilium Assembly	1	210	0.0138313	0.995976	0.995976
R-HSA-6811442	Intra-Golgi and retrograde Golgi-to-ER traffic	1	219	0.014424	0.996828	0.996828
R-HSA-948021	Transport to the Golgi and subsequent modification	1	219	0.014424	0.996828	0.996828
R-HSA-1483206	Glycerophospholipid biosynthesis	1	221	0.0145558	0.996992	0.996992
R-HSA-6805567	Keratinization	1	226	0.0148851	0.997365	0.997365
R-HSA-1483257	Phospholipid metabolism	2	314	0.020681	0.997616	0.997616
R-HSA-9748784	Drug ADME	1	230	0.0151485	0.99763	0.99763
R-HSA-112314	Neurotransmitter receptors and postsynaptic signal transmission	1	232	0.0152802	0.997752	0.997752
R-HSA-1852241	Organelle biogenesis and maintenance	2	338	0.0222617	0.998655	0.998655
R-HSA-72766	Translation	2	339	0.0223276	0.998686	0.998686
R-HSA-112315	Transmission across Chemical Synapses	2	344	0.0226569	0.998835	0.998835
R-HSA-8939211	ESR-mediated signaling	1	257	0.0169268	0.998841	0.998841
R-HSA-9006934	Signaling by Receptor Tyrosine Kinases	6	621	0.040901	0.998984	0.998984
R-HSA-156580	Phase II - Conjugation of compounds	1	263	0.017322	0.999012	0.999012
R-HSA-1266738	Developmental Biology	18	1279	0.084239	0.999051	0.999051
R-HSA-8978868	Fatty acid metabolism	3	431	0.028387	0.999115	0.999115
R-HSA-71387	Metabolism of carbohydrates	3	456	0.0300336	0.999497	0.999497
R-HSA-8953854	Metabolism of RNA	8	789	0.051966	0.99959	0.99959
R-HSA-112316	Neuronal System	3	490	0.0322729	0.999769	0.999769
R-HSA-392499	Metabolism of proteins	35	2214	0.145821	0.999783	0.999783
R-HSA-425407	SLC-mediated transmembrane transport	2	420	0.0276625	0.999816	0.999816
R-HSA-9006931	Signaling by Nuclear Receptors	1	387	0.025489	0.999964	0.999964
R-HSA-212436	Generic Transcription Pathway	19	1588	0.104591	0.999984	0.999984
R-HSA-162582	Signal Transduction	48	3023	0.199104	0.999985	0.999985
R-HSA-73857	RNA Polymerase II Transcription	20	1730	0.113943	0.999996	0.999996
R-HSA-74160	Gene expression (Transcription)	21	1893	0.124679	0.999999	0.999999
R-HSA-211859	Biological oxidations	1	551	0.0362906	1	1
R-HSA-556833	Metabolism of lipids	12	1446	0.0952381	1	1
R-HSA-1430728	Metabolism	46	3641	0.239808	1	1
R-HSA-9709957	Sensory Perception	5	1262	0.0831193	1	1

## Sheet: TwoToFourWeek_NegGenes_Pathways
Stable Identifier	Pathway Name	Entities Found	Entities Total	Entities Ratio	Entitis pValue	Entities FDR
R-HSA-69278	Cell Cycle, Mitotic	36	596	0.0392544	5.62617e-12	4.19149e-09
R-HSA-381119	Unfolded Protein Response (UPR)	18	155	0.0102088	8.35e-11	3.1062e-08
R-HSA-381038	XBP1(S) activates chaperone genes	14	95	0.006257	5.53966e-10	1.37383e-07
R-HSA-381070	IRE1alpha activates chaperones	14	101	0.00665218	1.20224e-09	2.23616e-07
R-HSA-1640170	Cell Cycle	36	734	0.0483435	1.59641e-09	2.37865e-07
R-HSA-453279	Mitotic G1 phase and G1/S transition	15	174	0.0114602	1.52645e-07	1.89279e-05
R-HSA-69205	G1/S-Specific Transcription	8	43	0.00283211	5.26629e-07	5.58226e-05
R-HSA-69206	G1/S Transition	13	150	0.00987947	9.82934e-07	9.14128e-05
R-HSA-5334118	DNA methylation	7	36	0.00237107	2.05121e-06	0.000168199
R-HSA-69620	Cell Cycle Checkpoints	17	279	0.0183758	2.63078e-06	0.000194677
R-HSA-69306	DNA Replication	13	169	0.0111309	3.57022e-06	0.000239205
R-HSA-212300	PRC2 methylates histones and DNA	7	44	0.00289798	7.51815e-06	0.000466125
R-HSA-73728	RNA Polymerase I Promoter Opening	6	34	0.00223935	1.91696e-05	0.00109267
R-HSA-1799339	SRP-dependent cotranslational protein targeting to membrane	10	119	0.00783771	2.30051e-05	0.00112725
R-HSA-2299718	Condensation of Prophase Chromosomes	7	55	0.00362247	3.10034e-05	0.00133315
R-HSA-68886	M Phase	19	416	0.0273991	3.80373e-05	0.00155953
R-HSA-68616	Assembly of the ORC complex at the origin of replication	6	40	0.00263453	4.70175e-05	0.00183368
R-HSA-69002	DNA Replication Pre-Initiation	10	132	0.00869393	5.44129e-05	0.00201328
R-HSA-427359	SIRT1 negatively regulates rRNA expression	6	45	0.00296384	8.93335e-05	0.00311007
R-HSA-68867	Assembly of the pre-replicative complex	9	114	0.0075084	9.42446e-05	0.00311007
R-HSA-201722	Formation of the beta-catenin:TCF transactivating complex	7	67	0.00441283	0.000105375	0.00323685
R-HSA-381183	ATF6 (ATF6-alpha) activates chaperone genes	4	15	0.000987947	0.000103274	0.00323685
R-HSA-2559582	Senescence-Associated Secretory Phenotype (SASP)	8	91	0.00599355	0.000111615	0.00323685
R-HSA-2262752	Cellular responses to stress	32	1005	0.0661925	0.000116637	0.00326584
R-HSA-427389	ERCC6 (CSB) and EHMT2 (G9a) positively regulate rRNA expression	6	48	0.00316143	0.000126563	0.00341721
R-HSA-5625886	Activated PKN1 stimulates transcription of AR (androgen receptor) regulated genes KLK2 and KLK3	6	49	0.00322729	0.000141388	0.00367609
R-HSA-9616222	Transcriptional regulation of granulopoiesis	7	71	0.00467628	0.000150027	0.00375068
R-HSA-8953897	Cellular responses to stimuli	32	1023	0.067378	0.000160702	0.00385685
R-HSA-381033	ATF6 (ATF6-alpha) activates chaperones	4	17	0.00111967	0.000166261	0.00399027
R-HSA-69481	G2/M Checkpoints	10	153	0.0100771	0.000179338	0.00412477
R-HSA-73884	Base Excision Repair	8	100	0.00658631	0.00021058	0.00463275
R-HSA-171306	Packaging Of Telomere Ends	5	34	0.00223935	0.000222917	0.00468125
R-HSA-606279	Deposition of new CENPA-containing nucleosomes at the centromere	6	54	0.00355661	0.000237412	0.00474824
R-HSA-774815	Nucleosome assembly	6	54	0.00355661	0.000237412	0.00474824
R-HSA-5693538	Homology Directed Repair	9	130	0.00856221	0.000247978	0.00495956
R-HSA-176417	Phosphorylation of Emi1	3	8	0.000526905	0.000295848	0.00562112
R-HSA-427413	NoRC negatively regulates rRNA expression	7	80	0.00526905	0.000307357	0.00583978
R-HSA-68875	Mitotic Prophase	9	135	0.00889152	0.00032572	0.00586295
R-HSA-912446	Meiotic recombination	6	58	0.00382006	0.000346145	0.00588446
R-HSA-110330	Recognition and association of DNA glycosylase with site containing an affected purine	5	39	0.00256866	0.00041556	0.00706453
R-HSA-73772	RNA Polymerase I Promoter Escape	6	61	0.00401765	0.000450657	0.00721052
R-HSA-5250924	B-WICH complex positively regulates rRNA expression	6	62	0.00408351	0.000490471	0.00784753
R-HSA-3214815	HDACs deacetylate histones	6	63	0.00414938	0.000532971	0.00799456
R-HSA-156711	Polo-like kinase mediated events	4	23	0.00151485	0.000517707	0.00799456
R-HSA-5250941	Negative epigenetic regulation of rRNA expression	7	89	0.00586182	0.000576089	0.00811422
R-HSA-5693607	Processing of DNA double-strand break ends	7	89	0.00586182	0.000576089	0.00811422
R-HSA-110328	Recognition and association of DNA glycosylase with site containing an affected pyrimidine	5	42	0.00276625	0.000579587	0.00811422
R-HSA-174143	APC/C-mediated degradation of cell cycle proteins	7	92	0.00605941	0.000698572	0.00978001
R-HSA-453276	Regulation of mitotic cell cycle	7	92	0.00605941	0.000698572	0.00978001
R-HSA-195258	RHO GTPase Effectors	14	326	0.0214714	0.000729959	0.0102194
R-HSA-110331	Cleavage of the damaged purine	5	45	0.00296384	0.000787978	0.0102437
R-HSA-5693567	HDR through Homologous Recombination (HRR) or Single Strand Annealing (SSA)	8	124	0.00816703	0.000856156	0.01113
R-HSA-73927	Depurination	5	46	0.0030297	0.000868502	0.0112905
R-HSA-9670095	Inhibition of DNA recombination at telomere	5	48	0.00316143	0.00104774	0.0125729
R-HSA-2559586	DNA Damage/Telomere Stress Induced Senescence	6	71	0.00467628	0.000985012	0.0125729
R-HSA-446203	Asparagine N-linked glycosylation	16	421	0.0277284	0.00112419	0.0134902
R-HSA-176409	APC/C:Cdc20 mediated degradation of mitotic proteins	6	76	0.0050056	0.00138945	0.0153454
R-HSA-2500257	Resolution of Sister Chromatid Cohesion	8	134	0.00882566	0.00139503	0.0153454
R-HSA-110329	Cleavage of the damaged pyrimidine	5	51	0.00335902	0.0013662	0.0153454
R-HSA-73928	Depyrimidination	5	51	0.00335902	0.0013662	0.0153454
R-HSA-176814	Activation of APC/C and APC/C:Cdc20 mediated degradation of mitotic proteins	6	77	0.00507146	0.00148363	0.0158259
R-HSA-8936459	RUNX1 regulates genes involved in megakaryocyte differentiation and platelet function	6	78	0.00513732	0.00158259	0.0158259
R-HSA-5693532	DNA Double-Strand Break Repair	9	169	0.0111309	0.0015616	0.0158259
R-HSA-73886	Chromosome Maintenance	8	136	0.00895739	0.00152962	0.0158259
R-HSA-8939236	RUNX1 regulates transcription of genes involved in differentiation of HSCs	7	106	0.00698149	0.00156803	0.0158259
R-HSA-5250913	Positive epigenetic regulation of rRNA expression	6	80	0.00526905	0.0017955	0.017955
R-HSA-5625740	RHO GTPases activate PKNs	6	80	0.00526905	0.0017955	0.017955
R-HSA-69473	G2/M DNA damage checkpoint	6	80	0.00526905	0.0017955	0.017955
R-HSA-157579	Telomere Maintenance	7	109	0.00717908	0.00183316	0.0183316
R-HSA-5578749	Transcriptional regulation by small RNAs	6	81	0.00533491	0.00190977	0.0190977
R-HSA-176408	Regulation of APC/C activators between G1/S and early anaphase	6	83	0.00546664	0.00215474	0.0198635
R-HSA-2555396	Mitotic Metaphase and Anaphase	11	250	0.0164658	0.00220706	0.0198635
R-HSA-2559580	Oxidative Stress Induced Senescence	7	114	0.0075084	0.00235093	0.0211584
R-HSA-73854	RNA Polymerase I Promoter Clearance	6	85	0.00559837	0.00242271	0.0218044
R-HSA-162658	Golgi Cisternae Pericentriolar Stack Reorganization	3	17	0.00111967	0.0025597	0.0230373
R-HSA-73864	RNA Polymerase I Transcription	6	87	0.00573009	0.002715	0.024435
R-HSA-1221632	Meiotic synapsis	5	62	0.00408351	0.0031601	0.0252808
R-HSA-1912408	Pre-NOTCH Transcription and Translation	6	89	0.00586182	0.00303298	0.0252808
R-HSA-977225	Amyloid fiber formation	6	89	0.00586182	0.00303298	0.0252808
R-HSA-1538133	G0 and Early G1	4	38	0.0025028	0.00321491	0.0257193
R-HSA-73929	Base-Excision Repair, AP Site Formation	5	63	0.00414938	0.00338073	0.0270458
R-HSA-1500620	Meiosis	6	92	0.00605941	0.00356107	0.0284885
R-HSA-141424	Amplification of signal from the kinetochores	6	94	0.00619113	0.00394922	0.0315938
R-HSA-141444	Amplification of signal from unattached kinetochores via a MAD2 inhibitory signal	6	94	0.00619113	0.00394922	0.0315938
R-HSA-69239	Synthesis of DNA	7	132	0.00869393	0.00519145	0.0376237
R-HSA-2559583	Cellular Senescence	9	200	0.0131726	0.00470834	0.0376237
R-HSA-400511	Synthesis, secretion, and inactivation of Glucose-dependent Insulinotropic Polypeptide (GIP)	3	22	0.00144899	0.00523925	0.0376237
R-HSA-69478	G2/M DNA replication checkpoint	2	7	0.000461042	0.00557714	0.03904
R-HSA-68882	Mitotic Anaphase	10	249	0.0163999	0.00644406	0.0451084
R-HSA-212165	Epigenetic regulation of gene expression	7	139	0.00915498	0.0068072	0.0476504
R-HSA-69242	S Phase	8	179	0.0117895	0.00782407	0.0547685
R-HSA-72766	Translation	12	339	0.0223276	0.00783565	0.0548495
R-HSA-422085	Synthesis, secretion, and deacylation of Ghrelin	3	26	0.00171244	0.0082626	0.0578382
R-HSA-3214847	HATs acetylate histones	6	110	0.00724495	0.00826936	0.0578855
R-HSA-69618	Mitotic Spindle Checkpoint	6	111	0.00731081	0.00862043	0.060343
R-HSA-194315	Signaling by Rho GTPases	20	709	0.046697	0.00865391	0.0605773
R-HSA-2980767	Activation of NIMA Kinases NEK9, NEK6, NEK7	2	9	0.000592768	0.00903214	0.063225
R-HSA-5617472	Activation of anterior HOX genes in hindbrain development during early embryogenesis	6	116	0.00764012	0.0105376	0.0632257
R-HSA-5619507	Activation of HOX genes during differentiation	6	116	0.00764012	0.0105376	0.0632257
R-HSA-5663220	RHO GTPases Activate Formins	7	149	0.00981361	0.00972736	0.0632257
R-HSA-1912422	Pre-NOTCH Expression and Processing	6	114	0.0075084	0.00973771	0.0632257
R-HSA-9716542	Signaling by Rho GTPases, Miro GTPases and RHOBTB3	20	725	0.0477508	0.0108524	0.0651146
R-HSA-110314	Recognition of DNA damage by PCNA-containing replication complex	3	30	0.00197589	0.0121288	0.0727731
R-HSA-5669034	TNFs bind their physiological receptors	3	30	0.00197589	0.0121288	0.0727731
R-HSA-5693571	Nonhomologous End-Joining (NHEJ)	4	56	0.00368834	0.0122081	0.0732485
R-HSA-211000	Gene Silencing by RNA	6	120	0.00790358	0.0122754	0.0736526
R-HSA-2467813	Separation of Sister Chromatids	8	195	0.0128433	0.0125898	0.0755386
R-HSA-9648025	EML4 and NUDC in mitotic spindle formation	6	121	0.00796944	0.0127396	0.0764375
R-HSA-380108	Chemokine receptors bind chemokines	4	57	0.0037542	0.0129477	0.0776861
R-HSA-3214842	HDMs demethylate histones	3	31	0.00204176	0.0132317	0.0793902
R-HSA-1474165	Reproduction	6	123	0.00810117	0.0137046	0.0822274
R-HSA-69273	Cyclin A/B1/B2 associated events during G2/M transition	3	32	0.00210762	0.0143899	0.0863396
R-HSA-110373	Resolution of AP sites via the multiple-nucleotide patch replacement pathway	3	32	0.00210762	0.0143899	0.0863396
R-HSA-176974	Unwinding of DNA	2	12	0.000790358	0.0155721	0.0934323
R-HSA-68962	Activation of the pre-replicative complex	3	36	0.00237107	0.0195826	0.0979131
R-HSA-68877	Mitotic Prometaphase	8	211	0.0138971	0.0192066	0.0979131
R-HSA-5689880	Ub-specific processing proteases	8	206	0.0135678	0.0169196	0.0979131
R-HSA-6791312	TP53 Regulates Transcription of Cell Cycle Genes	4	65	0.0042811	0.019899	0.0994951
R-HSA-201681	TCF dependent signaling in response to WNT	8	216	0.0142264	0.0217066	0.108533
R-HSA-5693565	Recruitment and ATM-mediated phosphorylation of repair and signaling proteins at DNA double strand breaks	4	67	0.00441283	0.0219345	0.109673
R-HSA-69190	DNA strand elongation	3	38	0.0025028	0.0225173	0.112586
R-HSA-2514853	Condensation of Prometaphase Chromosomes	2	15	0.000987947	0.0235991	0.117996
R-HSA-176187	Activation of ATR in response to replication stress	3	39	0.00256866	0.0240694	0.120347
R-HSA-5696400	Dual Incision in GG-NER	3	41	0.00270039	0.0273432	0.136716
R-HSA-901042	Calnexin/calreticulin cycle	3	41	0.00270039	0.0273432	0.136716
R-HSA-174184	Cdc20:Phospho-APC/C mediated degradation of Cyclin A	4	73	0.00480801	0.0287838	0.143919
R-HSA-68949	Orc1 removal from chromatin	4	73	0.00480801	0.0287838	0.143919
R-HSA-179419	APC:Cdc20 mediated degradation of cell cycle proteins prior to satisfation of the cell cycle checkpoint	4	74	0.00487387	0.0300353	0.150176
R-HSA-983705	Signaling by the B Cell Receptor (BCR)	7	189	0.0124481	0.0307415	0.153708
R-HSA-5693606	DNA Double Strand Break Response	4	75	0.00493974	0.0313185	0.156593
R-HSA-73894	DNA Repair	11	381	0.0250939	0.0394302	0.159526
R-HSA-446353	Cell-extracellular matrix interactions	2	19	0.0012514	0.0363586	0.159526
R-HSA-1362300	Transcription of E2F targets under negative control by p107 (RBL1) and p130 (RBL2) in complex with HDAC1	2	20	0.00131726	0.0398815	0.159526
R-HSA-9018519	Estrogen-dependent gene expression	6	154	0.0101429	0.0357189	0.159526
R-HSA-381771	Synthesis, secretion, and inactivation of Glucagon-like Peptide-1 (GLP-1)	3	47	0.00309557	0.0385094	0.159526
R-HSA-73933	Resolution of Abasic Sites (AP sites)	3	48	0.00316143	0.040564	0.162256
R-HSA-141405	Inhibition of the proteolytic activity of APC/C required for the onset of anaphase by mitotic spindle checkpoint components	2	21	0.00138313	0.0435279	0.174112
R-HSA-141430	Inactivation of APC/C via direct inhibition of the APC/C complex	2	21	0.00138313	0.0435279	0.174112
R-HSA-400508	Incretin synthesis, secretion, and inactivation	3	51	0.00335902	0.0470526	0.188211
R-HSA-5651801	PCNA-Dependent Long Patch Base Excision Repair	2	23	0.00151485	0.0511726	0.20469
R-HSA-8939211	ESR-mediated signaling	8	257	0.0169268	0.051315	0.20526
R-HSA-72695	Formation of the ternary complex, and subsequently, the 43S complex	3	54	0.00355661	0.0540193	0.216077
R-HSA-68881	Mitotic Metaphase/Anaphase Transition	1	4	0.000263453	0.0607842	0.216398
R-HSA-174048	APC/C:Cdc20 mediated degradation of Cyclin B	2	24	0.00158072	0.0551619	0.216398
R-HSA-179409	APC-Cdc20 mediated degradation of Nek2A	2	26	0.00171244	0.0634528	0.216398
R-HSA-5696397	Gap-filling DNA repair synthesis and ligation in GG-NER	2	27	0.0017783	0.0677462	0.216398
R-HSA-174113	SCF-beta-TrCP mediated degradation of Emi1	3	55	0.00362247	0.0564455	0.216398
R-HSA-73893	DNA Damage Bypass	3	57	0.0037542	0.0614504	0.216398
R-HSA-3214858	RMTs methylate histone arginines	3	55	0.00362247	0.0564455	0.216398
R-HSA-69052	Switching of origins to a post-replicative state	4	94	0.00619113	0.0617797	0.216398
R-HSA-532668	N-glycan trimming in the ER and Calnexin/Calreticulin cycle	3	57	0.0037542	0.0614504	0.216398
R-HSA-8878171	Transcriptional regulation by RUNX1	8	261	0.0171903	0.0551539	0.216398
R-HSA-1362277	Transcription of E2F targets under negative control by DREAM complex	2	25	0.00164658	0.0592567	0.216398
R-HSA-2995383	Initiation of Nuclear Envelope (NE) Reformation	2	27	0.0017783	0.0677462	0.216398
R-HSA-6804115	TP53 regulates transcription of additional cell cycle genes whose exact role in the p53 pathway remain uncertain	2	28	0.00184417	0.0721327	0.216398
R-HSA-392499	Metabolism of proteins	44	2214	0.145821	0.0564965	0.216398
R-HSA-8866654	E3 ubiquitin ligases ubiquitinate target proteins	3	61	0.00401765	0.0720542	0.216398
R-HSA-72649	Translation initiation complex formation	3	62	0.00408351	0.0748253	0.224476
R-HSA-170145	Phosphorylation of proteins involved in the G2/M transition by Cyclin A:Cdc2 complexes	1	5	0.000329316	0.0753963	0.226189
R-HSA-1280218	Adaptive Immune System	22	1012	0.0666535	0.0763624	0.229087
R-HSA-6791226	Major pathway of rRNA processing in the nucleolus and cytosol	6	189	0.0124481	0.0789441	0.236832
R-HSA-195721	Signaling by WNT	9	332	0.0218666	0.0799796	0.239939
R-HSA-983695	Antigen activates B Cell Receptor (BCR) leading to generation of second messengers	4	103	0.0067839	0.080175	0.240525
R-HSA-72702	Ribosomal scanning and start codon recognition	3	64	0.00421524	0.0805068	0.24152
R-HSA-5668541	TNFR2 non-canonical NF-kB pathway	4	104	0.00684977	0.0823699	0.24711
R-HSA-1266695	Interleukin-7 signaling	2	31	0.00204176	0.0858127	0.257438
R-HSA-72662	Activation of the mRNA upon binding of the cap-binding complex and eIFs, and subsequent binding to 43S	3	66	0.00434697	0.0863697	0.259109
R-HSA-5688426	Deubiquitination	8	289	0.0190344	0.0871048	0.261314
R-HSA-6811434	COPI-dependent Golgi-to-ER retrograde traffic	4	107	0.00704736	0.0891303	0.267391
R-HSA-9754119	Drug-mediated inhibition of CDK4/CDK6 activity	1	6	0.000395179	0.089782	0.269346
R-HSA-174154	APC/C:Cdc20 mediated degradation of Securin	3	68	0.00447869	0.0924082	0.277225
R-HSA-901032	ER Quality Control Compartment (ERQC)	2	33	0.00217348	0.0953295	0.285988
R-HSA-352230	Amino acid transport across the plasma membrane	3	69	0.00454456	0.0954915	0.286474
R-HSA-68911	G2 Phase	1	7	0.000461042	0.103945	0.31155
R-HSA-68689	CDC6 association with the ORC:origin complex	1	8	0.000526905	0.117888	0.31155
R-HSA-113507	E2F-enabled inhibition of pre-replication complex formation	1	9	0.000592768	0.131615	0.31155
R-HSA-8951430	RUNX3 regulates WNT signaling	1	10	0.000658631	0.14513	0.31155
R-HSA-4411364	Binding of TCF/LEF:CTNNB1 to target gene promoters	1	10	0.000658631	0.14513	0.31155
R-HSA-196025	Formation of annular gap junctions	1	11	0.000724495	0.158435	0.31155
R-HSA-1169092	Activation of RAS in B cells	1	11	0.000724495	0.158435	0.31155
R-HSA-190873	Gap junction degradation	1	12	0.000790358	0.171534	0.31155
R-HSA-3000484	Scavenging by Class F Receptors	1	16	0.00105381	0.22193	0.31155
R-HSA-8964315	G beta:gamma signalling through BTK	1	19	0.0012514	0.257713	0.31155
R-HSA-5656121	Translesion synthesis by POLI	1	20	0.00131726	0.269273	0.31155
R-HSA-430039	mRNA decay by 5' to 3' exoribonuclease	1	21	0.00138313	0.280653	0.31155
R-HSA-5655862	Translesion synthesis by POLK	1	21	0.00138313	0.280653	0.31155
R-HSA-418217	G beta:gamma signalling through PLC beta	1	23	0.00151485	0.302887	0.31155
R-HSA-69017	CDK-mediated phosphorylation and removal of Cdc6	3	75	0.00493974	0.114841	0.31155
R-HSA-6782210	Gap-filling DNA repair synthesis and ligation in TC-NER	2	66	0.00434697	0.276986	0.31155
R-HSA-975956	Nonsense Mediated Decay (NMD) independent of the Exon Junction Complex (EJC)	3	101	0.00665218	0.211954	0.31155
R-HSA-72689	Formation of a pool of free 40S subunits	3	106	0.00698149	0.232362	0.31155
R-HSA-72706	GTP hydrolysis and joining of the 60S ribosomal subunit	3	120	0.00790358	0.291038	0.31155
R-HSA-3214841	PKMTs methylate histone lysines	2	51	0.00335902	0.190887	0.31155
R-HSA-5656169	Termination of translesion DNA synthesis	2	35	0.00230521	0.105131	0.31155
R-HSA-110313	Translesion synthesis by Y family DNA polymerases bypasses lesions on DNA template	2	48	0.00316143	0.174077	0.31155
R-HSA-4839726	Chromatin organization	7	258	0.0169927	0.113546	0.31155
R-HSA-3247509	Chromatin modifying enzymes	7	258	0.0169927	0.113546	0.31155
R-HSA-8964616	G beta:gamma signalling through CDC42	1	21	0.00138313	0.280653	0.31155
R-HSA-6807878	COPI-mediated anterograde transport	3	107	0.00704736	0.236487	0.31155
R-HSA-927802	Nonsense-Mediated Decay (NMD)	3	124	0.00816703	0.308039	0.31155
R-HSA-110312	Translesion synthesis by REV1	1	19	0.0012514	0.257713	0.31155
R-HSA-156902	Peptide chain elongation	3	97	0.00638872	0.195931	0.31155
R-HSA-975957	Nonsense Mediated Decay (NMD) enhanced by the Exon Junction Complex (EJC)	3	124	0.00816703	0.308039	0.31155
R-HSA-69091	Polymerase switching	1	16	0.00105381	0.22193	0.31155
R-HSA-69109	Leading Strand Synthesis	1	16	0.00105381	0.22193	0.31155
R-HSA-5696399	Global Genome Nucleotide Excision Repair (GG-NER)	3	92	0.00605941	0.176357	0.31155
R-HSA-5690714	CD22 mediated BCR regulation	2	72	0.00474215	0.31155	0.31155
R-HSA-72200	mRNA Editing: C to U Conversion	1	10	0.000658631	0.14513	0.31155
R-HSA-5674135	MAP2K and MAPK activation	2	49	0.00322729	0.179654	0.31155
R-HSA-174178	APC/C:Cdh1 mediated degradation of Cdc20 and other APC/C:Cdh1 targeted proteins in late mitosis/early G1	3	74	0.00487387	0.111519	0.31155
R-HSA-72764	Eukaryotic Translation Termination	3	106	0.00698149	0.232362	0.31155
R-HSA-5658442	Regulation of RAS by GAPs	2	71	0.00467628	0.305808	0.31155
R-HSA-202424	Downstream TCR signaling	3	124	0.00816703	0.308039	0.31155
R-HSA-4641265	Repression of WNT target genes	1	16	0.00105381	0.22193	0.31155
R-HSA-187577	SCF(Skp2)-mediated degradation of p27/p21	2	62	0.00408351	0.253875	0.31155
R-HSA-193648	NRAGE signals death through JNK	2	64	0.00421524	0.26543	0.31155
R-HSA-199977	ER to Golgi Anterograde Transport	4	164	0.0108016	0.257145	0.31155
R-HSA-8868773	rRNA processing in the nucleus and cytosol	6	208	0.0136995	0.111001	0.31155
R-HSA-5696398	Nucleotide Excision Repair	3	119	0.00783771	0.286797	0.31155
R-HSA-75094	Formation of the Editosome	1	8	0.000526905	0.117888	0.31155
R-HSA-1462054	Alpha-defensins	1	11	0.000724495	0.158435	0.31155
R-HSA-2468052	Establishment of Sister Chromatid Cohesion	1	13	0.000856221	0.18443	0.31155
R-HSA-68952	DNA replication initiation	1	13	0.000856221	0.18443	0.31155
R-HSA-110362	POLB-Dependent Long Patch Base Excision Repair	1	15	0.000987947	0.209625	0.31155
R-HSA-9706574	RHOBTB GTPase Cycle	2	36	0.00237107	0.11013	0.31155
R-HSA-176412	Phosphorylation of the APC/C	1	20	0.00131726	0.269273	0.31155
R-HSA-3301854	Nuclear Pore Complex (NPC) Disassembly	2	42	0.00276625	0.141309	0.31155
R-HSA-500657	Presynaptic function of Kainate receptors	1	23	0.00151485	0.302887	0.31155
R-HSA-1169091	Activation of NF-kappaB in B cells	2	72	0.00474215	0.31155	0.31155
R-HSA-379716	Cytosolic tRNA aminoacylation	2	50	0.00329316	0.185258	0.31155
R-HSA-1168372	Downstream signaling events of B Cell Receptor (BCR)	3	91	0.00599355	0.17251	0.31155
R-HSA-156842	Eukaryotic Translation Elongation	3	102	0.00671804	0.216005	0.31155
R-HSA-948021	Transport to the Golgi and subsequent modification	6	219	0.014424	0.132183	0.31155
R-HSA-72312	rRNA processing	6	246	0.0162023	0.191398	0.31155
R-HSA-5685939	HDR through MMEJ (alt-NHEJ)	1	17	0.00111967	0.234045	0.31155
R-HSA-453274	Mitotic G2-G2/M phases	6	214	0.0140947	0.122327	0.31155
R-HSA-69275	G2/M Transition	6	212	0.013963	0.11849	0.31155
R-HSA-480985	Synthesis of dolichyl-phosphate-glucose	1	9	0.000592768	0.131615	0.31155
R-HSA-112313	Neurotransmitter uptake and metabolism In glial cells	1	10	0.000658631	0.14513	0.31155
R-HSA-210455	Astrocytic Glutamate-Glutamine Uptake And Metabolism	1	10	0.000658631	0.14513	0.31155
R-HSA-446205	Synthesis of GDP-mannose	1	11	0.000724495	0.158435	0.31155
R-HSA-6783984	Glycine degradation	1	15	0.000987947	0.209625	0.31155
R-HSA-4655427	SUMOylation of DNA methylation proteins	1	16	0.00105381	0.22193	0.31155
R-HSA-176407	Conversion from APC/C:Cdc20 to APC/C:Cdh1 in late anaphase	1	22	0.00144899	0.291857	0.31155
R-HSA-4419969	Depolymerisation of the Nuclear Lamina	1	23	0.00151485	0.302887	0.31155
R-HSA-5358346	Hedgehog ligand biogenesis	3	72	0.00474215	0.104989	0.31155
R-HSA-156827	L13a-mediated translational silencing of Ceruloplasmin expression	3	120	0.00790358	0.291038	0.31155
R-HSA-2980766	Nuclear Envelope Breakdown	2	65	0.0042811	0.271209	0.31155
R-HSA-1679131	Trafficking and processing of endosomal TLR	1	16	0.00105381	0.22193	0.31155
R-HSA-983189	Kinesins	2	68	0.00447869	0.288532	0.31155
R-HSA-6782135	Dual incision in TC-NER	2	68	0.00447869	0.288532	0.31155
R-HSA-2408557	Selenocysteine synthesis	3	112	0.00737667	0.257291	0.31155
R-HSA-8856688	Golgi-to-ER retrograde transport	4	148	0.00974774	0.204039	0.31155
R-HSA-2465910	MASTL Facilitates Mitotic Progression	1	12	0.000790358	0.171534	0.31155
R-HSA-68884	Mitotic Telophase/Cytokinesis	1	15	0.000987947	0.209625	0.31155
R-HSA-879415	Advanced glycosylation endproduct receptor signaling	1	16	0.00105381	0.22193	0.31155
R-HSA-77348	Beta oxidation of octanoyl-CoA to hexanoyl-CoA	1	18	0.00118554	0.245971	0.31155
R-HSA-6790901	rRNA modification in the nucleus and cytosol	2	72	0.00474215	0.31155	0.31155
R-HSA-9633012	Response of EIF2AK4 (GCN2) to amino acid deficiency	3	115	0.00757426	0.269892	0.31155
R-HSA-379724	tRNA Aminoacylation	2	68	0.00447869	0.288532	0.31155
R-HSA-73817	Purine ribonucleoside monophosphate biosynthesis	2	48	0.00316143	0.174077	0.31155
R-HSA-75072	mRNA Editing	1	12	0.000790358	0.171534	0.31155
R-HSA-180786	Extension of Telomeres	2	67	0.00441283	0.282761	0.31155
R-HSA-2559585	Oncogene Induced Senescence	2	42	0.00276625	0.141309	0.31155
R-HSA-198933	Immunoregulatory interactions between a Lymphoid and a non-Lymphoid cell	8	316	0.0208128	0.126339	0.31155
R-HSA-446388	Regulation of cytoskeletal remodeling and cell spreading by IPP complex components	1	8	0.000526905	0.117888	0.31155
R-HSA-6799990	Metal sequestration by antimicrobial proteins	1	13	0.000856221	0.18443	0.31155
R-HSA-75035	Chk1/Chk2(Cds1) mediated inactivation of Cyclin B:Cdk1 complex	1	15	0.000987947	0.209625	0.31155
R-HSA-964739	N-glycan trimming and elongation in the cis-Golgi	1	18	0.00118554	0.245971	0.31155
R-HSA-70350	Fructose catabolism	1	20	0.00131726	0.269273	0.31155
R-HSA-77346	Beta oxidation of decanoyl-CoA to octanoyl-CoA-CoA	1	21	0.00138313	0.280653	0.31155
R-HSA-3000480	Scavenging by Class A Receptors	2	49	0.00322729	0.179654	0.31155
R-HSA-8852276	The role of GTSE1 in G2/M progression after G2 checkpoint	3	83	0.00546664	0.142689	0.31155
R-HSA-382556	ABC-family proteins mediated transport	3	124	0.00816703	0.308039	0.31155
R-HSA-442380	Zinc influx into cells by the SLC39 gene family	1	11	0.000724495	0.158435	0.31155
R-HSA-975577	N-Glycan antennae elongation	1	19	0.0012514	0.257713	0.31155
R-HSA-71262	Carnitine synthesis	1	20	0.00131726	0.269273	0.31155
R-HSA-8963684	Tyrosine catabolism	1	20	0.00131726	0.269273	0.31155
R-HSA-77288	mitochondrial fatty acid beta-oxidation of unsaturated fatty acids	1	21	0.00138313	0.280653	0.31155
R-HSA-5625900	RHO GTPases activate CIT	1	23	0.00151485	0.302887	0.31155
R-HSA-8956320	Nucleotide biosynthesis	2	61	0.00401765	0.248101	0.31155
R-HSA-6803157	Antimicrobial peptides	3	123	0.00810117	0.303784	0.31155
R-HSA-8876198	RAB GEFs exchange GTP for GDP on RABs	3	94	0.00619113	0.18412	0.31155
R-HSA-442660	Na+/Cl- dependent neurotransmitter transporters	2	51	0.00335902	0.190887	0.31155
R-HSA-418889	Caspase activation via Dependence Receptors in the absence of ligand	1	12	0.000790358	0.171534	0.31155
R-HSA-6798163	Choline catabolism	1	22	0.00144899	0.291857	0.31155
R-HSA-597592	Post-translational protein modification	31	1604	0.105644	0.130544	0.31155
R-HSA-69615	G1/S DNA Damage Checkpoints	2	72	0.00474215	0.31155	0.31155
R-HSA-2173795	Downregulation of SMAD2/3:SMAD4 transcriptional activity	2	38	0.0025028	0.12031	0.31155
R-HSA-140877	Formation of Fibrin Clot (Clotting Cascade)	2	43	0.00283211	0.146675	0.31155
R-HSA-196757	Metabolism of folate and pterines	2	47	0.00309557	0.168529	0.31155
R-HSA-9006931	Signaling by Nuclear Receptors	8	387	0.025489	0.263514	0.31155
R-HSA-6804114	TP53 Regulates Transcription of Genes Involved in G2 Cell Cycle Arrest	1	21	0.00138313	0.280653	0.31155
R-HSA-8956321	Nucleotide salvage	2	69	0.00454456	0.294297	0.31155
R-HSA-69580	p53-Dependent G1/S DNA damage checkpoint	2	70	0.00461042	0.300056	0.31155
R-HSA-69563	p53-Dependent G1 DNA Damage Response	2	70	0.00461042	0.300056	0.31155
R-HSA-15869	Metabolism of nucleotides	6	256	0.016861	0.215565	0.31155
R-HSA-435354	Zinc transporters	1	18	0.00118554	0.245971	0.31155
R-HSA-111471	Apoptotic factor-mediated response	1	23	0.00151485	0.302887	0.31155
R-HSA-6785807	Interleukin-4 and Interleukin-13 signaling	5	211	0.0138971	0.237889	0.31155
R-HSA-8852135	Protein ubiquitination	3	84	0.0055325	0.146317	0.31155
R-HSA-375276	Peptide ligand-binding receptors	5	203	0.0133702	0.215227	0.31155
R-HSA-425366	Transport of bile salts and organic acids, metal ions and amine compounds	4	165	0.0108674	0.260558	0.31155
R-HSA-6804116	TP53 Regulates Transcription of Genes Involved in G1 Cell Cycle Arrest	1	20	0.00131726	0.269273	0.31155
R-HSA-2173793	Transcriptional activity of SMAD2/SMAD3:SMAD4 heterotrimer	2	64	0.00421524	0.26543	0.31155
R-HSA-71291	Metabolism of amino acids and derivatives	13	666	0.0438648	0.248218	0.31155
R-HSA-9768919	NPAS4 regulates expression of target genes	2	41	0.00270039	0.135986	0.31155
R-HSA-157118	Signaling by NOTCH	7	259	0.0170586	0.115216	0.31155
R-HSA-9634815	Transcriptional Regulation by NPAS4	2	60	0.00395179	0.242331	0.31155
R-HSA-2408522	Selenoamino acid metabolism	4	180	0.0118554	0.312626	0.312626
R-HSA-110320	Translesion Synthesis by POLH	1	24	0.00158072	0.313746	0.313746
R-HSA-392851	Prostacyclin signalling through prostacyclin receptor	1	24	0.00158072	0.313746	0.313746
R-HSA-9013422	RHOBTB1 GTPase cycle	1	24	0.00158072	0.313746	0.313746
R-HSA-9013418	RHOBTB2 GTPase cycle	1	24	0.00158072	0.313746	0.313746
R-HSA-113510	E2F mediated regulation of DNA replication	1	24	0.00158072	0.313746	0.313746
R-HSA-9754189	Germ layer formation at gastrulation	1	24	0.00158072	0.313746	0.313746
R-HSA-912631	Regulation of signaling by CBL	1	24	0.00158072	0.313746	0.313746
R-HSA-5685942	HDR through Homologous Recombination (HRR)	2	73	0.00480801	0.317283	0.317283
R-HSA-389661	Glyoxylate metabolism and glycine degradation	2	73	0.00480801	0.317283	0.317283
R-HSA-5653656	Vesicle-mediated transport	15	828	0.0545347	0.319767	0.319767
R-HSA-9010553	Regulation of expression of SLITs and ROBOs	4	183	0.012053	0.323177	0.323177
R-HSA-977347	Serine biosynthesis	1	25	0.00164658	0.324437	0.324437
R-HSA-140875	Common Pathway of Fibrin Clot Formation	1	25	0.00164658	0.324437	0.324437
R-HSA-72737	Cap-dependent Translation Initiation	3	130	0.00856221	0.333598	0.333598
R-HSA-72613	Eukaryotic Translation Initiation	3	130	0.00856221	0.333598	0.333598
R-HSA-2980736	Peptide hormone metabolism	3	130	0.00856221	0.333598	0.333598
R-HSA-202040	G-protein activation	1	26	0.00171244	0.334962	0.334962
R-HSA-392170	ADP signalling through P2Y purinoceptor 12	1	26	0.00171244	0.334962	0.334962
R-HSA-69186	Lagging Strand Synthesis	1	26	0.00171244	0.334962	0.334962
R-HSA-140837	Intrinsic Pathway of Fibrin Clot Formation	1	26	0.00171244	0.334962	0.334962
R-HSA-210991	Basigin interactions	1	26	0.00171244	0.334962	0.334962
R-HSA-9007101	Rab regulation of trafficking	3	131	0.00862807	0.337857	0.337857
R-HSA-446219	Synthesis of substrates in N-glycan biosythesis	3	131	0.00862807	0.337857	0.337857
R-HSA-204005	COPII-mediated vesicle transport	2	77	0.00507146	0.340094	0.340094
R-HSA-5652084	Fructose metabolism	1	27	0.0017783	0.345323	0.345323
R-HSA-9755088	Ribavirin ADME	1	27	0.0017783	0.345323	0.345323
R-HSA-9013408	RHOG GTPase cycle	2	78	0.00513732	0.345761	0.345761
R-HSA-9013106	RHOC GTPase cycle	2	79	0.00520319	0.351413	0.351413
R-HSA-199991	Membrane Trafficking	12	668	0.0439966	0.356439	0.356439
R-HSA-499943	Interconversion of nucleotide di- and triphosphates	2	80	0.00526905	0.357048	0.357048
R-HSA-4086398	Ca2+ pathway	2	81	0.00533491	0.362666	0.362666
R-HSA-204998	Cell death signalling via NRAGE, NRIF and NADE	2	81	0.00533491	0.362666	0.362666
R-HSA-392451	G beta:gamma signalling through PI3Kgamma	1	29	0.00191003	0.365566	0.365566
R-HSA-446210	Synthesis of UDP-N-acetyl-glucosamine	1	29	0.00191003	0.365566	0.365566
R-HSA-9634638	Estrogen-dependent nuclear events downstream of ESR-membrane signaling	1	29	0.00191003	0.365566	0.365566
R-HSA-428930	Thromboxane signalling through TP receptor	1	30	0.00197589	0.375453	0.375453
R-HSA-418592	ADP signalling through P2Y purinoceptor 1	1	30	0.00197589	0.375453	0.375453
R-HSA-9758941	Gastrulation	1	30	0.00197589	0.375453	0.375453
R-HSA-114608	Platelet degranulation	3	141	0.0092867	0.380291	0.380291
R-HSA-6781827	Transcription-Coupled Nucleotide Excision Repair (TC-NER)	2	85	0.00559837	0.384944	0.384944
R-HSA-1296059	G protein gated Potassium channels	1	31	0.00204176	0.385186	0.385186
R-HSA-1296041	Activation of G protein gated Potassium channels	1	31	0.00204176	0.385186	0.385186
R-HSA-997272	Inhibition of voltage gated Ca2+ channels via Gbeta/gamma subunits	1	31	0.00204176	0.385186	0.385186
R-HSA-174411	Polymerase switching on the C-strand of the telomere	1	31	0.00204176	0.385186	0.385186
R-HSA-1482801	Acyl chain remodelling of PS	1	31	0.00204176	0.385186	0.385186
R-HSA-416482	G alpha (12/13) signalling events	2	86	0.00566423	0.390461	0.390461
R-HSA-400042	Adrenaline,noradrenaline inhibits insulin secretion	1	32	0.00210762	0.394768	0.394768
R-HSA-5689901	Metalloprotease DUBs	1	32	0.00210762	0.394768	0.394768
R-HSA-5357769	Caspase activation via extrinsic apoptotic signalling pathway	1	32	0.00210762	0.394768	0.394768
R-HSA-8934593	Regulation of RUNX1 Expression and Activity	1	32	0.00210762	0.394768	0.394768
R-HSA-69202	Cyclin E associated events during G1/S transition	2	88	0.00579596	0.40143	0.40143
R-HSA-2995410	Nuclear Envelope (NE) Reassembly	2	88	0.00579596	0.40143	0.40143
R-HSA-445095	Interaction between L1 and Ankyrins	1	33	0.00217348	0.404201	0.404201
R-HSA-425410	Metal ion SLC transporters	1	33	0.00217348	0.404201	0.404201
R-HSA-202403	TCR signaling	3	147	0.00968188	0.405489	0.405489
R-HSA-76005	Response to elevated platelet cytosolic Ca2+	3	148	0.00974774	0.409662	0.409662
R-HSA-69656	Cyclin A:Cdk2-associated events at S phase entry	2	90	0.00592768	0.412306	0.412306
R-HSA-171319	Telomere Extension By Telomerase	1	34	0.00223935	0.413488	0.413488
R-HSA-451326	Activation of kainate receptors upon glutamate binding	1	34	0.00223935	0.413488	0.413488
R-HSA-73614	Pyrimidine salvage	1	34	0.00223935	0.413488	0.413488
R-HSA-5620971	Pyroptosis	1	34	0.00223935	0.413488	0.413488
R-HSA-2132295	MHC class II antigen presentation	3	149	0.00981361	0.413825	0.413825
R-HSA-195253	Degradation of beta-catenin by the destruction complex	2	91	0.00599355	0.417707	0.417707
R-HSA-418990	Adherens junctions interactions	1	35	0.00230521	0.422631	0.422631
R-HSA-420092	Glucagon-type ligand receptors	1	35	0.00230521	0.422631	0.422631
R-HSA-1592389	Activation of Matrix Metalloproteinases	1	35	0.00230521	0.422631	0.422631
R-HSA-2565942	Regulation of PLK1 Activity at G2/M Transition	2	92	0.00605941	0.423084	0.423084
R-HSA-2424491	DAP12 signaling	1	36	0.00237107	0.431632	0.431632
R-HSA-456926	Thrombin signalling through proteinase activated receptors (PARs)	1	36	0.00237107	0.431632	0.431632
R-HSA-2022854	Keratan sulfate biosynthesis	1	36	0.00237107	0.431632	0.431632
R-HSA-5626467	RHO GTPases activate IQGAPs	1	36	0.00237107	0.431632	0.431632
R-HSA-8980692	RHOA GTPase cycle	3	154	0.0101429	0.434498	0.434498
R-HSA-446728	Cell junction organization	2	95	0.006257	0.439057	0.439057
R-HSA-6804756	Regulation of TP53 Activity through Phosphorylation	2	95	0.006257	0.439057	0.439057
R-HSA-5694530	Cargo concentration in the ER	1	37	0.00243694	0.440493	0.440493
R-HSA-8963693	Aspartate and asparagine metabolism	1	37	0.00243694	0.440493	0.440493
R-HSA-390466	Chaperonin-mediated protein folding	2	96	0.00632286	0.444328	0.444328
R-HSA-1296065	Inwardly rectifying K+ channels	1	38	0.0025028	0.449216	0.449216
R-HSA-6811442	Intra-Golgi and retrograde Golgi-to-ER traffic	4	219	0.014424	0.449509	0.449509
R-HSA-5689603	UCH proteinases	2	98	0.00645459	0.454788	0.454788
R-HSA-446193	Biosynthesis of the N-glycan precursor (dolichol lipid-linked oligosaccharide, LLO) and transfer to a nascent protein	3	159	0.0104722	0.454899	0.454899
R-HSA-397795	G-protein beta:gamma signalling	1	39	0.00256866	0.457804	0.457804
R-HSA-5685938	HDR through Single Strand Annealing (SSA)	1	39	0.00256866	0.457804	0.457804
R-HSA-8856828	Clathrin-mediated endocytosis	3	161	0.010604	0.462975	0.462975
R-HSA-390471	Association of TriC/CCT with target proteins during biosynthesis	1	40	0.00263453	0.466259	0.466259
R-HSA-5696394	DNA Damage Recognition in GG-NER	1	40	0.00263453	0.466259	0.466259
R-HSA-163359	Glucagon signaling in metabolic regulation	1	40	0.00263453	0.466259	0.466259
R-HSA-392518	Signal amplification	1	41	0.00270039	0.474582	0.474582
R-HSA-5663213	RHO GTPases Activate WASPs and WAVEs	1	41	0.00270039	0.474582	0.474582
R-HSA-6814122	Cooperation of PDCL (PhLP1) and TRiC/CCT in G-protein beta folding	1	41	0.00270039	0.474582	0.474582
R-HSA-391251	Protein folding	2	102	0.00671804	0.475364	0.475364
R-HSA-202430	Translocation of ZAP-70 to Immunological synapse	1	42	0.00276625	0.482777	0.482777
R-HSA-5693616	Presynaptic phase of homologous DNA pairing and strand exchange	1	42	0.00276625	0.482777	0.482777
R-HSA-8964539	Glutamate and glutamine metabolism	1	42	0.00276625	0.482777	0.482777
R-HSA-3858494	Beta-catenin independent WNT signaling	3	166	0.0109333	0.482933	0.482933
R-HSA-76002	Platelet activation, signaling and aggregation	5	293	0.0192979	0.486518	0.486518
R-HSA-425393	Transport of inorganic cations/anions and amino acids/oligopeptides	3	167	0.0109991	0.486883	0.486883
R-HSA-425407	SLC-mediated transmembrane transport	7	420	0.0276625	0.487889	0.487889
R-HSA-2173782	Binding and Uptake of Ligands by Scavenger Receptors	3	168	0.011065	0.490818	0.490818
R-HSA-5358351	Signaling by Hedgehog	3	168	0.011065	0.490818	0.490818
R-HSA-114604	GPVI-mediated activation cascade	1	43	0.00283211	0.490843	0.490843
R-HSA-8963691	Phenylalanine and tyrosine metabolism	1	43	0.00283211	0.490843	0.490843
R-HSA-6804757	Regulation of TP53 Degradation	1	43	0.00283211	0.490843	0.490843
R-HSA-109582	Hemostasis	13	803	0.0528881	0.492695	0.492695
R-HSA-3769402	Deactivation of the beta-catenin transactivating complex	1	44	0.00289798	0.498785	0.498785
R-HSA-5357801	Programmed Cell Death	4	234	0.015412	0.500247	0.500247
R-HSA-170834	Signaling by TGF-beta Receptor Complex	2	107	0.00704736	0.500413	0.500413
R-HSA-418594	G alpha (i) signalling events	7	426	0.0280577	0.50275	0.50275
R-HSA-376176	Signaling by ROBO receptors	4	235	0.0154778	0.503561	0.503561
R-HSA-202427	Phosphorylation of CD3 and TCR zeta chains	1	45	0.00296384	0.506603	0.506603
R-HSA-389948	PD-1 signaling	1	45	0.00296384	0.506603	0.506603
R-HSA-5693579	Homologous DNA Pairing and Strand Exchange	1	45	0.00296384	0.506603	0.506603
R-HSA-74217	Purine salvage	1	45	0.00296384	0.506603	0.506603
R-HSA-8957275	Post-translational protein phosphorylation	2	109	0.00717908	0.510217	0.510217
R-HSA-9035034	RHOF GTPase cycle	1	46	0.0030297	0.5143	0.5143
R-HSA-975576	N-glycan antennae elongation in the medial/trans-Golgi	1	46	0.0030297	0.5143	0.5143
R-HSA-6806003	Regulation of TP53 Expression and Degradation	1	46	0.0030297	0.5143	0.5143
R-HSA-193704	p75 NTR receptor-mediated signalling	2	110	0.00724495	0.515072	0.515072
R-HSA-9009391	Extra-nuclear estrogen signaling	2	111	0.00731081	0.519895	0.519895
R-HSA-9711097	Cellular response to starvation	3	176	0.0115919	0.521753	0.521753
R-HSA-5696395	Formation of Incision Complex in GG-NER	1	47	0.00309557	0.521877	0.521877
R-HSA-8853884	Transcriptional Regulation by VENTX	1	48	0.00316143	0.529337	0.529337
R-HSA-71240	Tryptophan catabolism	1	48	0.00316143	0.529337	0.529337
R-HSA-174417	Telomere C-strand (Lagging Strand) Synthesis	1	49	0.00322729	0.53668	0.53668
R-HSA-5675221	Negative regulation of MAPK pathway	1	49	0.00322729	0.53668	0.53668
R-HSA-8856825	Cargo recognition for clathrin-mediated endocytosis	2	115	0.00757426	0.538865	0.538865
R-HSA-211733	Regulation of activated PAK-2p34 by proteasome mediated degradation	1	50	0.00329316	0.54391	0.54391
R-HSA-991365	Activation of GABAB receptors	1	50	0.00329316	0.54391	0.54391
R-HSA-381676	Glucagon-like Peptide-1 (GLP1) regulates insulin secretion	1	50	0.00329316	0.54391	0.54391
R-HSA-977444	GABA B receptor activation	1	50	0.00329316	0.54391	0.54391
R-HSA-71403	Citric acid cycle (TCA cycle)	1	50	0.00329316	0.54391	0.54391
R-HSA-512988	Interleukin-3, Interleukin-5 and GM-CSF signaling	1	50	0.00329316	0.54391	0.54391
R-HSA-3108232	SUMO E3 ligases SUMOylate target proteins	3	183	0.012053	0.547968	0.547968
R-HSA-983168	Antigen processing: Ubiquitination & Proteasome degradation	5	315	0.0207469	0.550266	0.550266
R-HSA-1461973	Defensins	1	51	0.00335902	0.551027	0.551027
R-HSA-350562	Regulation of ornithine decarboxylase (ODC)	1	51	0.00335902	0.551027	0.551027
R-HSA-1638074	Keratan sulfate/keratin metabolism	1	51	0.00335902	0.551027	0.551027
R-HSA-75876	Synthesis of very long-chain fatty acyl-CoAs	1	51	0.00335902	0.551027	0.551027
R-HSA-8878159	Transcriptional regulation by RUNX3	2	118	0.00777185	0.552751	0.552751
R-HSA-69231	Cyclin D associated events in G1	1	52	0.00342488	0.558034	0.558034
R-HSA-69236	G1 Phase	1	52	0.00342488	0.558034	0.558034
R-HSA-190828	Gap junction trafficking	1	52	0.00342488	0.558034	0.558034
R-HSA-1614558	Degradation of cysteine and homocysteine	1	52	0.00342488	0.558034	0.558034
R-HSA-3928662	EPHB-mediated forward signaling	1	52	0.00342488	0.558034	0.558034
R-HSA-5607764	CLEC7A (Dectin-1) signaling	2	120	0.00790358	0.561844	0.561844
R-HSA-2172127	DAP12 interactions	1	53	0.00349075	0.564931	0.564931
R-HSA-432040	Vasopressin regulates renal water homeostasis via Aquaporins	1	53	0.00349075	0.564931	0.564931
R-HSA-1236978	Cross-presentation of soluble exogenous antigens (endosomes)	1	53	0.00349075	0.564931	0.564931
R-HSA-77286	mitochondrial fatty acid beta-oxidation of saturated fatty acids	1	53	0.00349075	0.564931	0.564931
R-HSA-5673001	RAF/MAP kinase cascade	5	322	0.0212079	0.569752	0.569752
R-HSA-69613	p53-Independent G1/S DNA damage checkpoint	1	54	0.00355661	0.571722	0.571722
R-HSA-9762114	GSK3B and BTRC:CUL1-mediated-degradation of NFE2L2	1	54	0.00355661	0.571722	0.571722
R-HSA-69601	Ubiquitin Mediated Degradation of Phosphorylated Cdc25A	1	54	0.00355661	0.571722	0.571722
R-HSA-69610	p53-Independent DNA Damage Response	1	54	0.00355661	0.571722	0.571722
R-HSA-349425	Autodegradation of the E3 ubiquitin ligase COP1	1	54	0.00355661	0.571722	0.571722
R-HSA-75815	Ubiquitin-dependent degradation of Cyclin D	1	54	0.00355661	0.571722	0.571722
R-HSA-169911	Regulation of Apoptosis	1	54	0.00355661	0.571722	0.571722
R-HSA-202733	Cell surface interactions at the vascular wall	4	257	0.0169268	0.573799	0.573799
R-HSA-8854050	FBXL7 down-regulates AURKA during mitotic entry and in early mitosis	1	55	0.00362247	0.578407	0.578407
R-HSA-437239	Recycling pathway of L1	1	55	0.00362247	0.578407	0.578407
R-HSA-3928665	EPH-ephrin mediated repulsion of cells	1	55	0.00362247	0.578407	0.578407
R-HSA-1483191	Synthesis of PC	1	55	0.00362247	0.578407	0.578407
R-HSA-2990846	SUMOylation	3	192	0.0126457	0.580411	0.580411
R-HSA-109581	Apoptosis	3	192	0.0126457	0.580411	0.580411
R-HSA-9012999	RHO GTPase cycle	7	460	0.030297	0.58388	0.58388
R-HSA-2029480	Fcgamma receptor (FCGR) dependent phagocytosis	3	193	0.0127116	0.583924	0.583924
R-HSA-9634597	GPER1 signaling	1	56	0.00368834	0.584988	0.584988
R-HSA-450408	AUF1 (hnRNP D0) binds and destabilizes mRNA	1	56	0.00368834	0.584988	0.584988
R-HSA-983231	Factors involved in megakaryocyte development and platelet production	3	194	0.0127774	0.587419	0.587419
R-HSA-5684996	MAPK1/MAPK3 signaling	5	329	0.021669	0.5888	0.5888
R-HSA-4641258	Degradation of DVL	1	57	0.0037542	0.591466	0.591466
R-HSA-4641257	Degradation of AXIN	1	57	0.0037542	0.591466	0.591466
R-HSA-157858	Gap junction trafficking and regulation	1	57	0.0037542	0.591466	0.591466
R-HSA-9604323	Negative regulation of NOTCH4 signaling	1	57	0.0037542	0.591466	0.591466
R-HSA-8941858	Regulation of RUNX3 expression and activity	1	57	0.0037542	0.591466	0.591466
R-HSA-9013405	RHOD GTPase cycle	1	57	0.0037542	0.591466	0.591466
R-HSA-381426	Regulation of Insulin-like Growth Factor (IGF) transport and uptake by Insulin-like Growth Factor Binding Proteins (IGFBPs)	2	127	0.00836462	0.592624	0.592624
R-HSA-9748787	Azathioprine ADME	1	58	0.00382006	0.597844	0.597844
R-HSA-70895	Branched-chain amino acid catabolism	1	58	0.00382006	0.597844	0.597844
R-HSA-2029485	Role of phospholipids in phagocytosis	2	129	0.00849634	0.601118	0.601118
R-HSA-202433	Generation of second messenger molecules	1	59	0.00388593	0.604123	0.604123
R-HSA-69541	Stabilization of p53	1	59	0.00388593	0.604123	0.604123
R-HSA-168256	Immune System	41	2698	0.177699	0.613001	0.613001
R-HSA-445355	Smooth Muscle Contraction	1	61	0.00401765	0.616389	0.616389
R-HSA-5676590	NIK-->noncanonical NF-kB signaling	1	61	0.00401765	0.616389	0.616389
R-HSA-1500931	Cell-Cell communication	2	134	0.00882566	0.621769	0.621769
R-HSA-5610780	Degradation of GLI1 by the proteasome	1	62	0.00408351	0.62238	0.62238
R-HSA-5610785	GLI3 is processed to GLI3R by the proteasome	1	62	0.00408351	0.62238	0.62238
R-HSA-5610783	Degradation of GLI2 by the proteasome	1	62	0.00408351	0.62238	0.62238
R-HSA-4551638	SUMOylation of chromatin organization proteins	1	62	0.00408351	0.62238	0.62238
R-HSA-418597	G alpha (z) signalling events	1	63	0.00414938	0.628277	0.628277
R-HSA-9753281	Paracetamol ADME	1	63	0.00414938	0.628277	0.628277
R-HSA-6798695	Neutrophil degranulation	7	480	0.0316143	0.628485	0.628485
R-HSA-9006936	Signaling by TGFB family members	2	136	0.00895739	0.629797	0.629797
R-HSA-174084	Autodegradation of Cdh1 by Cdh1:APC/C	1	64	0.00421524	0.634083	0.634083
R-HSA-9662361	Sensory processing of sound by outer hair cells of the cochlea	1	64	0.00421524	0.634083	0.634083
R-HSA-109606	Intrinsic Pathway for Apoptosis	1	64	0.00421524	0.634083	0.634083
R-HSA-429914	Deadenylation-dependent mRNA decay	1	65	0.0042811	0.639798	0.639798
R-HSA-977606	Regulation of Complement cascade	2	139	0.00915498	0.641589	0.641589
R-HSA-4608870	Asymmetric localization of PCP proteins	1	66	0.00434697	0.645424	0.645424
R-HSA-5607761	Dectin-1 mediated noncanonical NF-kB signaling	1	66	0.00434697	0.645424	0.645424
R-HSA-70263	Gluconeogenesis	1	66	0.00434697	0.645424	0.645424
R-HSA-8873719	RAB geranylgeranylation	1	68	0.00447869	0.656416	0.656416
R-HSA-977443	GABA receptor activation	1	68	0.00447869	0.656416	0.656416
R-HSA-421270	Cell-cell junction organization	1	68	0.00447869	0.656416	0.656416
R-HSA-445717	Aquaporin-mediated transport	1	69	0.00454456	0.661784	0.661784
R-HSA-1442490	Collagen degradation	1	69	0.00454456	0.661784	0.661784
R-HSA-9707616	Heme signaling	1	70	0.00461042	0.667068	0.667068
R-HSA-8878166	Transcriptional regulation by RUNX2	2	147	0.00968188	0.671592	0.671592
R-HSA-1234176	Oxygen-dependent proline hydroxylation of Hypoxia-inducible Factor Alpha	1	72	0.00474215	0.677391	0.677391
R-HSA-6782315	tRNA modification in the nucleus and cytosol	1	72	0.00474215	0.677391	0.677391
R-HSA-5218859	Regulated Necrosis	1	73	0.00480801	0.682433	0.682433
R-HSA-8948751	Regulation of PTEN stability and activity	1	74	0.00487387	0.687396	0.687396
R-HSA-9013026	RHOB GTPase cycle	1	75	0.00493974	0.692282	0.692282
R-HSA-9662360	Sensory processing of sound by inner hair cells of the cochlea	1	76	0.0050056	0.697091	0.697091
R-HSA-1650814	Collagen biosynthesis and modifying enzymes	1	76	0.0050056	0.697091	0.697091
R-HSA-166658	Complement cascade	2	156	0.0102746	0.702887	0.702887
R-HSA-449147	Signaling by Interleukins	9	658	0.0433379	0.706862	0.706862
R-HSA-2029482	Regulation of actin dynamics for phagocytic cup formation	2	158	0.0104064	0.709497	0.709497
R-HSA-5683057	MAPK family signaling cascades	5	380	0.025028	0.712468	0.712468
R-HSA-2454202	Fc epsilon receptor (FCERI) signaling	3	235	0.0154778	0.71404	0.71404
R-HSA-351202	Metabolism of polyamines	1	80	0.00526905	0.715593	0.715593
R-HSA-1445148	Translocation of SLC2A4 (GLUT4) to the plasma membrane	1	81	0.00533491	0.72004	0.72004
R-HSA-3108214	SUMOylation of DNA damage response and repair proteins	1	81	0.00533491	0.72004	0.72004
R-HSA-75105	Fatty acyl-CoA biosynthesis	1	82	0.00540078	0.724418	0.724418
R-HSA-73887	Death Receptor Signalling	2	164	0.0108016	0.728595	0.728595
R-HSA-8939902	Regulation of RUNX2 expression and activity	1	83	0.00546664	0.728727	0.728727
R-HSA-917937	Iron uptake and transport	1	83	0.00546664	0.728727	0.728727
R-HSA-196807	Nicotinate metabolism	1	84	0.0055325	0.732969	0.732969
R-HSA-383280	Nuclear Receptor transcription pathway	1	86	0.00566423	0.741257	0.741257
R-HSA-6796648	TP53 Regulates Transcription of DNA Repair Genes	1	86	0.00566423	0.741257	0.741257
R-HSA-1234174	Cellular response to hypoxia	1	86	0.00566423	0.741257	0.741257
R-HSA-9659379	Sensory processing of sound	1	87	0.00573009	0.745304	0.745304
R-HSA-2151201	Transcriptional activation of mitochondrial biogenesis	1	88	0.00579596	0.749288	0.749288
R-HSA-1236974	ER-Phagosome pathway	2	173	0.0113943	0.755246	0.755246
R-HSA-2871837	FCERI mediated NF-kB activation	2	175	0.011526	0.760854	0.760854
R-HSA-1989781	PPARA activates gene expression	2	175	0.011526	0.760854	0.760854
R-HSA-983169	Class I MHC mediated antigen processing & presentation	6	479	0.0315484	0.763876	0.763876
R-HSA-9013404	RAC2 GTPase cycle	1	92	0.00605941	0.764613	0.764613
R-HSA-5632684	Hedgehog 'on' state	1	92	0.00605941	0.764613	0.764613
R-HSA-9013694	Signaling by NOTCH4	1	92	0.00605941	0.764613	0.764613
R-HSA-1614635	Sulfur amino acid metabolism	1	92	0.00605941	0.764613	0.764613
R-HSA-400206	Regulation of lipid metabolism by PPARalpha	2	177	0.0116578	0.766351	0.766351
R-HSA-450531	Regulation of mRNA stability by proteins that bind AU-rich elements	1	93	0.00612527	0.768297	0.768297
R-HSA-5633007	Regulation of TP53 Activity	2	178	0.0117236	0.769058	0.769058
R-HSA-196849	Metabolism of water-soluble vitamins and cofactors	3	258	0.0169927	0.770817	0.770817
R-HSA-3700989	Transcriptional Regulation by TP53	6	484	0.0318778	0.772376	0.772376
R-HSA-373076	Class A/1 (Rhodopsin-like receptors)	5	414	0.0272673	0.779023	0.779023
R-HSA-4086400	PCP/CE pathway	1	99	0.00652045	0.789222	0.789222
R-HSA-373080	Class B/2 (Secretin family receptors)	1	99	0.00652045	0.789222	0.789222
R-HSA-388841	Costimulation by the CD28 family	1	99	0.00652045	0.789222	0.789222
R-HSA-9013423	RAC3 GTPase cycle	1	100	0.00658631	0.792522	0.792522
R-HSA-71406	Pyruvate metabolism and Citric Acid (TCA) cycle	1	100	0.00658631	0.792522	0.792522
R-HSA-8953854	Metabolism of RNA	10	789	0.051966	0.795391	0.795391
R-HSA-2682334	EPH-Ephrin signaling	1	102	0.00671804	0.798967	0.798967
R-HSA-909733	Interferon alpha/beta signaling	2	190	0.012514	0.799475	0.799475
R-HSA-2029481	FCGR activation	1	103	0.0067839	0.802115	0.802115
R-HSA-1474290	Collagen formation	1	104	0.00684977	0.805214	0.805214
R-HSA-168928	DDX58/IFIH1-mediated induction of interferon-alpha/beta	1	104	0.00684977	0.805214	0.805214
R-HSA-77289	Mitochondrial Fatty Acid Beta-Oxidation	1	105	0.00691563	0.808264	0.808264
R-HSA-1236975	Antigen processing-Cross presentation	2	195	0.0128433	0.81107	0.81107
R-HSA-2168880	Scavenging of heme from plasma	1	106	0.00698149	0.811267	0.811267
R-HSA-5687128	MAPK6/MAPK4 signaling	1	106	0.00698149	0.811267	0.811267
R-HSA-9759194	Nuclear events mediated by NFE2L2	1	106	0.00698149	0.811267	0.811267
R-HSA-1296071	Potassium Channels	1	107	0.00704736	0.814223	0.814223
R-HSA-422356	Regulation of insulin secretion	1	108	0.00711322	0.817133	0.817133
R-HSA-983170	Antigen Presentation: Folding, assembly and peptide loading of class I MHC	1	108	0.00711322	0.817133	0.817133
R-HSA-5621481	C-type lectin receptors (CLRs)	2	203	0.0133702	0.828385	0.828385
R-HSA-111885	Opioid Signalling	1	113	0.00744253	0.831015	0.831015
R-HSA-382551	Transport of small molecules	12	971	0.0639531	0.838108	0.838108
R-HSA-418346	Platelet homeostasis	1	118	0.00777185	0.843848	0.843848
R-HSA-5610787	Hedgehog 'off' state	1	124	0.00816703	0.857972	0.857972
R-HSA-9020702	Interleukin-1 signaling	1	125	0.00823289	0.860199	0.860199
R-HSA-1483206	Glycerophospholipid biosynthesis	2	221	0.0145558	0.862238	0.862238
R-HSA-1592230	Mitochondrial biogenesis	1	128	0.00843048	0.866674	0.866674
R-HSA-2871809	FCERI mediated Ca+2 mobilization	1	129	0.00849634	0.868765	0.868765
R-HSA-6811558	PI5P, PP2A and IER3 Regulate PI3K/AKT Signaling	1	129	0.00849634	0.868765	0.868765
R-HSA-4420097	VEGFA-VEGFR2 Pathway	1	129	0.00849634	0.868765	0.868765
R-HSA-373760	L1CAM interactions	1	130	0.00856221	0.870824	0.870824
R-HSA-212436	Generic Transcription Pathway	20	1588	0.104591	0.875547	0.875547
R-HSA-9748784	Drug ADME	2	230	0.0151485	0.876775	0.876775
R-HSA-199418	Negative regulation of the PI3K/AKT network	1	137	0.00902325	0.884361	0.884361
R-HSA-70326	Glucose metabolism	1	140	0.00922084	0.889721	0.889721
R-HSA-194138	Signaling by VEGF	1	140	0.00922084	0.889721	0.889721
R-HSA-9755511	KEAP1-NFE2L2 pathway	1	141	0.0092867	0.891452	0.891452
R-HSA-163685	Integration of energy metabolism	1	147	0.00968188	0.901285	0.901285
R-HSA-168249	Innate Immune System	16	1345	0.0885859	0.902822	0.902822
R-HSA-1474228	Degradation of the extracellular matrix	1	148	0.00974774	0.902835	0.902835
R-HSA-8951664	Neddylation	2	249	0.0163999	0.902944	0.902944
R-HSA-877300	Interferon gamma signaling	2	252	0.0165975	0.906571	0.906571
R-HSA-500792	GPCR ligand binding	6	608	0.0400448	0.917282	0.917282
R-HSA-162582	Signal Transduction	39	3023	0.199104	0.9282	0.9282
R-HSA-6807070	PTEN Regulation	1	171	0.0112626	0.932505	0.932505
R-HSA-388396	GPCR downstream signalling	8	794	0.0522953	0.933425	0.933425
R-HSA-1280215	Cytokine Signaling in Immune system	12	1107	0.0729105	0.934421	0.934421
R-HSA-196854	Metabolism of vitamins and cofactors	3	382	0.0251597	0.939751	0.939751
R-HSA-1630316	Glycosaminoglycan metabolism	1	181	0.0119212	0.942404	0.942404
R-HSA-446652	Interleukin-1 family signaling	1	183	0.012053	0.944203	0.944203
R-HSA-73857	RNA Polymerase II Transcription	20	1730	0.113943	0.945044	0.945044
R-HSA-72306	tRNA processing	1	184	0.0121188	0.945081	0.945081
R-HSA-72163	mRNA Splicing - Major Pathway	1	188	0.0123823	0.948459	0.948459
R-HSA-418555	G alpha (s) signalling events	1	189	0.0124481	0.949271	0.949271
R-HSA-422475	Axon guidance	5	585	0.0385299	0.953561	0.953561
R-HSA-72172	mRNA Splicing	1	199	0.0131068	0.956719	0.956719
R-HSA-1483257	Phospholipid metabolism	2	314	0.020681	0.958315	0.958315
R-HSA-168898	Toll-like Receptor Cascades	1	202	0.0133044	0.958733	0.958733
R-HSA-1257604	PIP3 activates AKT signaling	2	321	0.0211421	0.962026	0.962026
R-HSA-1474244	Extracellular matrix organization	2	328	0.0216031	0.965421	0.965421
R-HSA-372790	Signaling by GPCR	8	875	0.0576302	0.966918	0.966918
R-HSA-9675108	Nervous system development	5	621	0.040901	0.967885	0.967885
R-HSA-74160	Gene expression (Transcription)	21	1893	0.124679	0.968977	0.968977
R-HSA-112315	Transmission across Chemical Synapses	2	344	0.0226569	0.972122	0.972122
R-HSA-397014	Muscle contraction	1	232	0.0152802	0.97439	0.97439
R-HSA-112314	Neurotransmitter receptors and postsynaptic signal transmission	1	232	0.0152802	0.97439	0.97439
R-HSA-71387	Metabolism of carbohydrates	3	456	0.0300336	0.975042	0.975042
R-HSA-1428517	The citric acid (TCA) cycle and respiratory electron transport	1	238	0.0156754	0.976723	0.976723
R-HSA-9006925	Intracellular signaling by second messengers	2	368	0.0242376	0.979887	0.979887
R-HSA-1266738	Developmental Biology	12	1279	0.084239	0.982953	0.982953
R-HSA-72203	Processing of Capped Intron-Containing Pre-mRNA	1	259	0.0170586	0.983344	0.983344
R-HSA-9711123	Cellular response to chemical stress	1	269	0.0177172	0.9858	0.9858
R-HSA-913531	Interferon Signaling	2	397	0.0261477	0.98651	0.98651
R-HSA-416476	G alpha (q) signalling events	1	284	0.0187051	0.988824	0.988824
R-HSA-8978868	Fatty acid metabolism	2	431	0.028387	0.991606	0.991606
R-HSA-1852241	Organelle biogenesis and maintenance	1	338	0.0222617	0.99529	0.99529
R-HSA-112316	Neuronal System	2	490	0.0322729	0.996366	0.996366
R-HSA-9006934	Signaling by Receptor Tyrosine Kinases	1	621	0.040901	0.999952	0.999952
R-HSA-1430728	Metabolism	29	3641	0.239808	0.999998	0.999998
R-HSA-556833	Metabolism of lipids	5	1446	0.0952381	0.999999	0.999999
R-HSA-9709957	Sensory Perception	1	1262	0.0831193	1	1
